# Supplementary material for: Summary of the Available Molecular Methods for Detection of SARS-CoV-2 during the Ongoing Pandemic
Source: Int J Mol Sci. 2021 Jan 28;22(3):1298. doi: 10.3390/ijms22031298 (PMC7865767; doi:10.3390/ijms22031298)
Supplement: Supplementary file 1 [file ijms-22-01298-s001.xlsx]

## Sheet: nextstrain_ncov_global_gisaid_s
List of Laboratories submitting sequencing data to GISAID
Strain	GISAID Clade	Age	Clade	Country	Country of exposure	Admin Division	Division of exposure	gisaid_epi_isl	Host	Originating Lab	Pangolin lineage	Submission Date	Region	Sex	Submitting Lab	url	Collection Data	Author	Location	genbank_accession
SouthAfrica/NHLS-UCT-GS-0038/2020	G	37	19A	South Africa	South Africa	Western Cape Province	Western Cape Province	EPI_ISL_640060	Human	Groote Schuur Hospital wc GSH	B.1.153	One month ago	Africa	Male	NHLS/UCT		2020-03-17	Arash Iranzadeh et al
Zimbabwe/ZW-1193B/2020	G	28	20B	Zimbabwe	Zimbabwe	Zimbabwe	Zimbabwe	EPI_ISL_647971	Human	National Microbiology Reference Laboratory	B.1.23	One month ago	Africa	Female	Quadram Institute Bioscience		2020-06-01	Thanh Le Viet et al
DRC/D09-0700/2020	G	60	20A	Democratic Republic of the Congo	Democratic Republic of the Congo	Kinshasa	Kinshasa	EPI_ISL_636987	Human	Virology Lab, National Institute for Biomedical Research (INRB)	B.1	One month ago	Africa	Male	Project group Epidemology of Highly Pathogenic Microorganisms, Robert Koch-Institute		2020-06-08	Jean-Jacques Muyembe Tamfum et al
EquatorialGuinea/18251/2020	G	35	20A	Equatorial Guinea	Equatorial Guinea	Bioko Norte	Bioko Norte	EPI_ISL_649161	Human	Laboratorio de Investigaciones de Baney	B.1	One month ago	Africa	Male	University Hospital Basel, Clinical Bacteriology		2020-06-13	Carlos Cortes et al	Malabo
EquatorialGuinea/46215/2020	G	40	20A	Equatorial Guinea	Equatorial Guinea	Bioko Norte	Bioko Norte	EPI_ISL_649172	Human	Laboratorio de Investigaciones de Baney	B.1	One month ago	Africa	Female	University Hospital Basel, Clinical Bacteriology		2020-08-02	Carlos Cortes et al	Baney
BurkinaFaso/2-040-1615/2020	G	28	20A	Burkina Faso	Burkina Faso	Hauts-Bassins	Hauts-Bassins	EPI_ISL_660490	Human	Laboratoire de Microbiologie CHU Souro Sanou	B.1.5	One week ago	Africa	Female	Centre Muraz		2020-08-12	Abdoul-Salam Ouedraogo et al	Hound√©
SouthAfrica/NHLS-UCT-GS-0024/2020	G	66	20A	South Africa	South Africa	Western Cape Province	Western Cape Province	EPI_ISL_640025	Human	Mitchells Plain CHC wc MHC	B.1.5.19	One month ago	Africa	Female	NHLS/UCT		2020-08-14	Arash Iranzadeh et al	Mitchells Plain
SouthAfrica/KRISP-K004299/2020	G	20	20A	South Africa	South Africa	KwaZulu-Natal	KwaZulu-Natal	EPI_ISL_660179	Human	NHLS-IALCH	B.1.5.16	One week ago	Africa	Female	KRISP, KZN Research Innovation and Sequencing Platform		2020-08-14	Gazy I et al	eThekwini
SouthAfrica/NHLS-UCT-GS-0026/2020	G	57	20A	South Africa	South Africa	Western Cape Province	Western Cape Province	EPI_ISL_640027	Human	George Hospital wc GRH	B.1.5	One month ago	Africa	Male	NHLS/UCT		2020-08-16	Arash Iranzadeh et al	George
SouthAfrica/NHLS-UCT-GS-0031/2020	G	71	20A	South Africa	South Africa	Western Cape Province	Western Cape Province	EPI_ISL_640032	Human	Victoria Hospital wc VHW	B.1.5	One month ago	Africa	Male	NHLS/UCT		2020-08-18	Arash Iranzadeh et al
SouthAfrica/NHLS-UCT-GS-0033/2020	G	39	20A	South Africa	South Africa	Western Cape Province	Western Cape Province	EPI_ISL_640034	Human	Sedgefield Clinic wc SGE	B.1	One month ago	Africa	Male	NHLS/UCT		2020-08-20	Arash Iranzadeh et al	Knysna
SouthAfrica/NHLS-UCT-GS-1770/2020	G	67	20A	South Africa	South Africa	Western Cape Province	Western Cape Province	EPI_ISL_640107	Human	2 Military Hospital wc MAA	B.1.5	One month ago	Africa	Male	NHLS/UCT		2020-09-01	Arash Iranzadeh et al
BurkinaFaso/2342/2020	G	49	20A	Burkina Faso	Burkina Faso	Hauts-Bassins	Hauts-Bassins	EPI_ISL_660491	Human	Laboratoire de Microbiologie CHU Souro Sanou	B.1.5	One week ago	Africa	Female	Centre Muraz		2020-09-09	Abdoul-Salam Ouedraogo et al	Bobo Dioulasso
SouthAfrica/NHLS-UCT-GS-2031/2020	G	41	20A	South Africa	South Africa	Western Cape Province	Western Cape Province	EPI_ISL_640123	Human	False Bay Hospital wc FBH	B.1.5	One month ago	Africa	Female	NHLS/UCT		2020-09-18	Arash Iranzadeh et al
SouthAfrica/NHLS-UCT-GS-2078/2020	G	30	20A	South Africa	South Africa	Western Cape Province	Western Cape Province	EPI_ISL_640126	Human	Victoria Hospital wc VHW	B.1.5.19	One month ago	Africa	Female	NHLS/UCT		2020-09-21	Arash Iranzadeh et al
SouthAfrica/KRISP-K003994/2020	G	64	20A	South Africa	South Africa	KwaZulu-Natal	KwaZulu-Natal	EPI_ISL_634982	Human	National Health Laboratory Service - Inkosi Albert Luthuli Central Hospital (NHLS-IALCH)	B.1	One month ago	Africa	Female	KRISP, KZN Research Innovation and Sequencing Platform		2020-09-26	Giandhari J et al A	uMgungundlovu
SouthAfrica/KRISP-K003992/2020	G	17	20B	South Africa	South Africa	KwaZulu-Natal	KwaZulu-Natal	EPI_ISL_634980	Human	National Health Laboratory Service - Inkosi Albert Luthuli Central Hospital (NHLS-IALCH)	B.1	One month ago	Africa	Female	KRISP, KZN Research Innovation and Sequencing Platform		2020-09-27	Giandhari J et al A	uMkhanyakude
SouthAfrica/NHLS-UCT-GS-3472/2020	G	27	20A	South Africa	South Africa	Western Cape Province	Western Cape Province	EPI_ISL_640136	Human	Red Cross Children's Hospital wc RXH	B.1.5	One month ago	Africa	Female	NHLS/UCT		2020-09-28	Arash Iranzadeh et al
SouthAfrica/Tygerberg_337_CC2/2020	G	18	20A	South Africa	South Africa	Western Cape Province	Western Cape Province	EPI_ISL_660144	Human	PathCare	B.1.5	One week ago	Africa	Female	National Health Laboratory Service (NHLS), Tygerberg		2020-10-09	Susan Engelbrecht et al	Cape Town
SouthAfrica/NHLS-UCT-GS-3516/2020	G	25	20A	South Africa	South Africa	Western Cape Province	Western Cape Province	EPI_ISL_640139	Human	Groote Schuur Hospital wc GSH	B.1.5	One month ago	Africa	Male	NHLS/UCT		2020-10-09	Arash Iranzadeh et al
SouthAfrica/NHLS-UCT-GS-3559/2020	G	15	20A	South Africa	South Africa	Western Cape Province	Western Cape Province	EPI_ISL_640095	Human	Du Noon CDC wc DNC	B.1	One month ago	Africa	Male	NHLS/UCT		2020-10-09	Arash Iranzadeh et al
SouthAfrica/Tygerberg_323_CC2/2020	G	19	20A	South Africa	South Africa	Western Cape Province	Western Cape Province	EPI_ISL_660132	Human	Lancet	B.1.5	One week ago	Africa	Female	National Health Laboratory Service (NHLS), Tygerberg		2020-10-11	Susan Engelbrecht et al	Cape Town
SouthAfrica/Tygerberg_359_CC2/2020	G	13	20A	South Africa	South Africa	Western Cape Province	Western Cape Province	EPI_ISL_660154	Human	PathCare	B.1.5	One week ago	Africa	Male	National Health Laboratory Service (NHLS), Tygerberg		2020-10-12	Susan Engelbrecht et al	Cape Town
SouthAfrica/KRISP-K004059/2020	G	60	20A	South Africa	South Africa	KwaZulu-Natal	KwaZulu-Natal	EPI_ISL_635038	Human	National Health Laboratory Service - Inkosi Albert Luthuli Central Hospital (NHLS-IALCH)	B.1.5	One month ago	Africa	Female	KRISP, KZN Research Innovation and Sequencing Platform		2020-10-18	Giandhari J et al A	Ugu
SouthAfrica/KRISP-K004061/2020	G	23	20A	South Africa	South Africa	KwaZulu-Natal	KwaZulu-Natal	EPI_ISL_635040	Human	National Health Laboratory Service - Inkosi Albert Luthuli Central Hospital (NHLS-IALCH)	B.1.5	One month ago	Africa	Male	KRISP, KZN Research Innovation and Sequencing Platform		2020-10-18	Giandhari J et al A	Ugu
SouthAfrica/KRISP-K004053/2020	G	11	20A	South Africa	South Africa	KwaZulu-Natal	KwaZulu-Natal	EPI_ISL_635032	Human	National Health Laboratory Service - Inkosi Albert Luthuli Central Hospital (NHLS-IALCH)	B.1.5	One month ago	Africa	Male	KRISP, KZN Research Innovation and Sequencing Platform		2020-10-18	Giandhari J et al A	Ugu
SouthAfrica/KRISP-K004055/2020	G	56	20A	South Africa	South Africa	KwaZulu-Natal	KwaZulu-Natal	EPI_ISL_635034	Human	National Health Laboratory Service - Inkosi Albert Luthuli Central Hospital (NHLS-IALCH)	B.1.5	One month ago	Africa	Male	KRISP, KZN Research Innovation and Sequencing Platform		2020-10-19	Giandhari J et al A	Ugu
SouthAfrica/KRISP-K004049/2020	G	71	20A	South Africa	South Africa	KwaZulu-Natal	KwaZulu-Natal	EPI_ISL_635028	Human	National Health Laboratory Service - Inkosi Albert Luthuli Central Hospital (NHLS-IALCH)	B.1.5	One month ago	Africa	Female	KRISP, KZN Research Innovation and Sequencing Platform		2020-10-20	Giandhari J et al A	Ugu
SouthAfrica/KRISP-K004334/2020	G	67	20A	South Africa	South Africa	KwaZulu-Natal	KwaZulu-Natal	EPI_ISL_660210	Human	NHLS-IALCH	B.1.5	One week ago	Africa	Male	KRISP, KZN Research Innovation and Sequencing Platform		2020-10-24	Giandhari J et al A	Ugu
SouthAfrica/KRISP-K004333/2020	G	57	20A	South Africa	South Africa	KwaZulu-Natal	KwaZulu-Natal	EPI_ISL_660209	Human	NHLS-IALCH	B.1.5.19	One week ago	Africa	Female	KRISP, KZN Research Innovation and Sequencing Platform		2020-10-24	Giandhari J et al A	uMkhanyakude
SouthAfrica/KRISP-K004323/2020	G	55	20A	South Africa	South Africa	KwaZulu-Natal	KwaZulu-Natal	EPI_ISL_660199	Human	NHLS-IALCH	B.1.5	One week ago	Africa	Male	KRISP, KZN Research Innovation and Sequencing Platform		2020-10-25	Giandhari J et al A	eThekwini
SouthAfrica/KRISP-K004317/2020	G	12	20A	South Africa	South Africa	KwaZulu-Natal	KwaZulu-Natal	EPI_ISL_660194	Human	NHLS-IALCH	B.1.5	One week ago	Africa	Female	KRISP, KZN Research Innovation and Sequencing Platform		2020-10-26	Giandhari J et al A	Ugu
SouthAfrica/KRISP-K004341/2020	G	87	20A	South Africa	South Africa	KwaZulu-Natal	KwaZulu-Natal	EPI_ISL_660217	Human	NHLS-IALCH	B.1.5	One week ago	Africa	Female	KRISP, KZN Research Innovation and Sequencing Platform		2020-10-28	Giandhari J et al A	Ugu
SouthAfrica/KRISP-K004633/2020	G	40	20A	South Africa	South Africa	KwaZulu-Natal	KwaZulu-Natal	EPI_ISL_660649	Human	NHLS-IALCH	B.1.5.19	One week ago	Africa	Female	KRISP, KZN Research Innovation and Sequencing Platform		2020-11-04	Giandhari J et al A	uMgungundlovu
SouthAfrica/KRISP-K004595/2020	G	13	20A	South Africa	South Africa	KwaZulu-Natal	KwaZulu-Natal	EPI_ISL_660625	Human	NHLS-IALCH	B.1.5.19	One week ago	Africa	Female	KRISP, KZN Research Innovation and Sequencing Platform		2020-11-05	Giandhari J et al A	uMkhanyakude
SouthAfrica/KRISP-K004535-CS1/2020	G	21	20A	South Africa	South Africa	KwaZulu-Natal	KwaZulu-Natal	EPI_ISL_660233	Human	KRISP, KZN Research Innovation and Sequencing Platform	B.1	One week ago	Africa	Male	KRISP, KZN Research Innovation and Sequencing Platform		2020-11-09	Giandhari J et al A	eThekwini
SouthAfrica/KRISP-EC-K005320/2020	G	45	20A	South Africa	South Africa	KwaZulu-Natal	KwaZulu-Natal	EPI_ISL_678611	Human	NHLS-IALCH	B.1.5	1-2 days ago	Africa	Male	KRISP, KZN Research Innovation and Sequencing Platform		2020-11-15	Giandhari J et al A	uThukela
SouthAfrica/KRISP-EC-K005312/2020	G	23	20A	South Africa	South Africa	KwaZulu-Natal	KwaZulu-Natal	EPI_ISL_678605	Human	NHLS-IALCH	B.1.5	1-2 days ago	Africa	Female	KRISP, KZN Research Innovation and Sequencing Platform		2020-11-16	Giandhari J et al A	uThukela
SouthAfrica/KRISP-EC-K005237/2020	G	62	20A	South Africa	South Africa	Eastern Cape	Eastern Cape	EPI_ISL_678593	Human	Netcare	B.1	1-2 days ago	Africa	Male	KRISP, KZN Research Innovation and Sequencing Platform		2020-11-18	Giandhari J et al A	Nelson Mandela Bay
SouthAfrica/KRISP-EC-K005255/2020	G	36	20A	South Africa	South Africa	Eastern Cape	Eastern Cape	EPI_ISL_678589	Human	Netcare	B.1.141	1-2 days ago	Africa	Female	KRISP, KZN Research Innovation and Sequencing Platform		2020-11-18	Giandhari J et al A	Nelson Mandela Bay
SouthAfrica/KRISP-EC-K005248/2020	G	38	20C	South Africa	South Africa	Eastern Cape	Eastern Cape	EPI_ISL_678548	Human	Netcare	B.1.8	1-2 days ago	Africa	Female	KRISP, KZN Research Innovation and Sequencing Platform		2020-11-18	Giandhari J et al A	Nelson Mandela Bay
SouthAfrica/KRISP-EC-K005252/2020	G	48	20C	South Africa	South Africa	Eastern Cape	Eastern Cape	EPI_ISL_678561	Human	Netcare	B.1	1-2 days ago	Africa	Male	KRISP, KZN Research Innovation and Sequencing Platform		2020-11-18	Giandhari J et al A	Nelson Mandela Bay
SouthAfrica/KRISP-EC-K005231/2020	G	26	20C	South Africa	South Africa	Eastern Cape	Eastern Cape	EPI_ISL_678594	Human	Netcare	B.1	1-2 days ago	Africa	Female	KRISP, KZN Research Innovation and Sequencing Platform		2020-11-18	Giandhari J et al A	Nelson Mandela Bay
SouthAfrica/KRISP-EC-K005259/2020	G	47	20B	South Africa	South Africa	Eastern Cape	Eastern Cape	EPI_ISL_678581	Human	Netcare	B.1.1	1-2 days ago	Africa	Male	KRISP, KZN Research Innovation and Sequencing Platform		2020-11-18	Giandhari J et al A	Nelson Mandela Bay
SouthAfrica/KRISP-EC-K005274/2020	G	57	20A	South Africa	South Africa	Eastern Cape	Eastern Cape	EPI_ISL_678585	Human	Netcare	B.1.5	1-2 days ago	Africa	Female	KRISP, KZN Research Innovation and Sequencing Platform		2020-11-19	Giandhari J et al A	Nelson Mandela Bay
SouthAfrica/KRISP-EC-K005302/2020	G	51	20A	South Africa	South Africa	Eastern Cape	Eastern Cape	EPI_ISL_678582	Human	Netcare	B.1	1-2 days ago	Africa	Male	KRISP, KZN Research Innovation and Sequencing Platform		2020-11-19	Giandhari J et al A	Nelson Mandela Bay
SouthAfrica/KRISP-EC-K005292/2020	G	43	20A	South Africa	South Africa	Eastern Cape	Eastern Cape	EPI_ISL_678580	Human	Netcare	B.1	1-2 days ago	Africa	Female	KRISP, KZN Research Innovation and Sequencing Platform		2020-11-19	Giandhari J et al A	Nelson Mandela Bay
SouthAfrica/KRISP-EC-K005279/2020	G	56	20A	South Africa	South Africa	Eastern Cape	Eastern Cape	EPI_ISL_678584	Human	Netcare	B.1	1-2 days ago	Africa	Female	KRISP, KZN Research Innovation and Sequencing Platform		2020-11-19	Giandhari J et al A	Nelson Mandela Bay
Jordan/MA-ALSR-2583/2020	G		20A	Jordan	Jordan	Mafraq	Mafraq	EPI_ISL_635780	Human	Biolab Diagnostic Laboratories	B.1.5	One month ago	Asia		Andersen lab at Scripps Research		2020-06-04	Issa Abu-Dayyeh et al
SaudiArabia/KAUST-RIYADH1268/2020	G		20A	Saudi Arabia	Saudi Arabia	Riyadh	Riyadh	EPI_ISL_678225	Human	Pathogen Genomics Lab King Abdullah University of Science and Technology(KAUST)	B.1.36	1-2 days ago	Asia		Pathogen Genomics Lab King Abdullah University of Science and Technology(KAUST)		2020-07-18	Sara Mfarrej et al
SaudiArabia/KAUST-RIYADH1251/2020	G		20A	Saudi Arabia	Saudi Arabia	Riyadh	Riyadh	EPI_ISL_678217	Human	Pathogen Genomics Lab King Abdullah University of Science and Technology(KAUST)	B.1.5	1-2 days ago	Asia		Pathogen Genomics Lab King Abdullah University of Science and Technology(KAUST)		2020-08-11	Sara Mfarrej et al
SaudiArabia/KAUST-RIYADH1235/2020	G		20A	Saudi Arabia	Saudi Arabia	Riyadh	Riyadh	EPI_ISL_678212	Human	Pathogen Genomics Lab King Abdullah University of Science and Technology(KAUST)	B.1.5	1-2 days ago	Asia		Pathogen Genomics Lab King Abdullah University of Science and Technology(KAUST)		2020-08-11	Muhammad Shuaib et al
Lebanon/LAU1-53249/2020	G	32	20A	Lebanon	Lebanon	Beirut	Beirut	EPI_ISL_637110	Human	Rafik Hariri University Hospital	B.1.5	One month ago	Asia	Female	Microbial Pathogenomics Lab		2020-08-13	Georgi Merhi et al
Lebanon/LAU3-53451/2020	G	38	20A	Lebanon	Lebanon	Beirut	Beirut	EPI_ISL_637112	Human	Rafik Hariri University Hospital	B.1.5	One month ago	Asia	Male	Microbial Pathogenomics Lab		2020-08-14	Georgi Merhi et al
Lebanon/LAU4-53460/2020	G	58	20A	Lebanon	Lebanon	Beirut	Beirut	EPI_ISL_637113	Human	Rafik Hariri University Hospital	B.1.5	One month ago	Asia	Male	Microbial Pathogenomics Lab		2020-08-14	Georgi Merhi et al
India/DL-69864-CSIR-IGIB/2020	G	31	20B	India	India	Delhi	Delhi	EPI_ISL_636771	Human	National Centre for Disease control (NCDC)	B.1	One month ago	Asia	Male	NCDC/CSIR-IGIB		2020-08-14	Mahesh S. Dhar1* et al
Malaysia/IMR_CV140342/2020	G		20A	Malaysia	Malaysia	Malaysia	Malaysia	EPI_ISL_644671	Human	Institute for Medical Research, Infectious Disease Research Centre, National Institutes of Health, Ministry of Health Malaysia	B.1.5	One month ago	Asia	Male	Institute for Medical Research, Infectious Disease Research Centre, National Institutes of Health, Ministry of Health Malaysia		2020-09-01	Suppiah J et al
Malaysia/IMR_CV140329/2020	G		20A	Malaysia	Malaysia	Malaysia	Malaysia	EPI_ISL_644672	Human	Institute for Medical Research, Infectious Disease Research Centre, National Institutes of Health, Ministry of Health Malaysia	B.1.5	One month ago	Asia	Male	Institute for Medical Research, Infectious Disease Research Centre, National Institutes of Health, Ministry of Health Malaysia		2020-09-01	Suppiah J et al
SriLanka/cov3576/2020	G	42	20C	Sri Lanka	Sri Lanka	Colombo	Colombo	EPI_ISL_668455	Human	Centre for Dengue Research, Department of Immunology and Molecular Medicine	B.1.5.6	3-7 days ago	Asia	Male	Centre for Dengue Research, Department of Immunology and Molecular Medicine		2020-11-02	Chandima Jeewandara et al A
SriLanka/C27607/2020	G	36	20C	Sri Lanka	Sri Lanka	Colombo	Colombo	EPI_ISL_668453	Human	Centre for Dengue Research, Department of Immunology and Molecular Medicine	B.1.5.6	3-7 days ago	Asia	Male	Centre for Dengue Research, Department of Immunology and Molecular Medicine		2020-11-03	Chandima Jeewandara et al A
SriLanka/C29572/2020	G	22	20C	Sri Lanka	Sri Lanka	Colombo	Colombo	EPI_ISL_668451	Human	Centre for Dengue Research, Department of Immunology and Molecular Medicine	B.1.5.6	3-7 days ago	Asia	Male	Centre for Dengue Research, Department of Immunology and Molecular Medicine		2020-11-06	Chandima Jeewandara et al A
France/ARA-SC402/2020	G	96	20A	France	France	Auvergne-Rh√¥ne-Alpes	Auvergne-Rh√¥ne-Alpes	EPI_ISL_660364	Human	CHU Clermont-Ferrand	B.1	One week ago	Europe	Female	CNR Virus des Infections Respiratoires - France SUD		2020-04-15	Antonin Bal et al	Clermont-Ferrand
Poland/PL_MCB_71/2020	G		20A	Poland	Poland	Poland	Poland	EPI_ISL_645070	Human	Human Genome Variation Research Group, Malopolska Centre of Biotechnology	B.1	One month ago	Europe		Human Genome Variation Research Group, Malopolska Centre of Biotechnology		2020-05-10	Kowalski et al		MW273853.1
Serbia/NoviSad-215042606/2020	G		20A	Serbia	Serbia	South Baƒçka District	South Baƒçka District	EPI_ISL_661192	Human	Scientific Veterinary Institute Novi Sad	B.1	One week ago	Europe		Veterinary Specialized Institute "Kraljevo", Serbia		2020-06-25	Vidanovic et al	Novi Sad
France/PAC-MEPHI-2281/2020	G		20A	France	France	Provence-Alpes-C√¥te d'Azur	Provence-Alpes-C√¥te d'Azur	EPI_ISL_644532	Human	MEPHI, Aix Marseille University	B.1.5.12	One month ago	Europe		MEPHI, Aix Marseille University		2020-08-03	Anthony LEVASSEUR et al	Marseille
NorthMacedonia/9675/2020	G	57	20A	North Macedonia	North Macedonia	Eastern Region	Eastern Region	EPI_ISL_678250	Human	Clinical Hospital - Shtip	B.1	1-2 days ago	Europe	Male	Research Center for Genetic Engineering and Biotechnology "Georgi D. Efremov‚Äù , Macedonian Academy of Sciences and Arts		2020-08-10	RCGEB - MASA et al	Shtip
Serbia/Sabac-000012108/2020	G		20B	Serbia	Serbia	Sabac	Sabac	EPI_ISL_678486	Human	Veterinary Specialized Institute "Sabac", Serbia	B.1.1.1	1-2 days ago	Europe		Veterinary Specialized Institute "Kraljevo", Serbia		2020-08-20	Vidanovic et al
Spain/CT-IBV-97009133/2020	G	57	20A	Spain	Spain	Catalunya	Catalunya	EPI_ISL_671811	Human	Hospital de la Santa Creu i Sant Pau. Servicio de Microbiolog√≠a	B.1.105	3-7 days ago	Europe	Female	SeqCOVID-SPAIN consortium/IBV(CSIC)		2020-08-29	Ferran Navarro et al	Barcelona
Hungary/UD-56273/2020	G	21	20B	Hungary	Hungary	Hajd√∫-Bihar County	Hajd√∫-Bihar County	EPI_ISL_671422	Human	University of Debrecen, Department of Medical Microbiology	B.1.5	3-7 days ago	Europe	Female	National Laboratory of Virology, Szent√°gothai Research Centre		2020-08-31	Endre G√°bor T√≥th et al
Belgium/ULG-10619/2020	G	54	20A	Belgium	Belgium	Li√®ge	Li√®ge	EPI_ISL_626252	Human	Department of Clinical Microbiology	B.1.78	One month ago	Europe	Male	GIGA Medical Genomics		2020-09-05	Keith Durkin et al
Lithuania/MR-LUHS-Eilnr452/2020	G	47	20A	Lithuania	Lithuania	Kauno Apskritis	Kauno Apskritis	EPI_ISL_636890	Human	Lithuanian University of Health Sciences Hospital, Department of Laboratory Medicine	B.1.131	One month ago	Europe	Male	Lithuanian University of Health Sciences, Molecular cardiology lab.		2020-09-08	Lukas Zemaitis et al
Lithuania/MR-LUHS-Eilnr474/2020	G	55	20A	Lithuania	Lithuania	Kauno Apskritis	Kauno Apskritis	EPI_ISL_636902	Human	Lithuanian University of Health Sciences Hospital, Department of Laboratory Medicine	B.1.131	One month ago	Europe	Female	Lithuanian University of Health Sciences, Molecular cardiology lab.		2020-09-12	Lukas Zemaitis et al
CzechRepublic/NRL_8923/2020	G	31	20A	Czech Republic	Czech Republic	Prague	Prague	EPI_ISL_626578	Human	The National Institute of Public Health	B.1.5	One month ago	Europe	Female	State Veterinary Institute Prague		2020-09-14	Nagy et al
CzechRepublic/NRL_8972-2/2020	G	37	20A	Czech Republic	Czech Republic	Prague	Prague	EPI_ISL_626581	Human	The National Institute of Public Health	B.1.5	One month ago	Europe	Male	State Veterinary Institute Prague		2020-09-15	Nagy et al
Germany/NW-HHU-245/2020	G		20A	Germany	Germany	North Rhine Westphalia	North Rhine Westphalia	EPI_ISL_631378	Human	University Hospital Cologne	B.1.5	One month ago	Europe		Center of Medical Microbiology, Virology, and Hospital Hygiene, University of Duesseldorf		2020-09-16	Maximilian Damagnez et al	Cologne
Sweden/20-22276/2020	G	81	20A	Sweden	Sweden	Skane	Skane	EPI_ISL_676531	Human	Klinisk mikrobiologi	B.1.78	3-7 days ago	Europe	Male	The Public Health Agency of Sweden		2020-09-17	Department of Microbiology et al
CzechRepublic/NRL_9179-1/2020	G	19	20A	Czech Republic	Czech Republic	Central Bohemian Region	Liberec Region	EPI_ISL_626571	Human	The National Institute of Public Health	B.1.5	One month ago	Europe	Male	State Veterinary Institute Prague		2020-09-19	Nagy et al	Kolin
Netherlands/ZH-EMC-704/2020	G		20A	Netherlands	Netherlands	South Holland	South Holland	EPI_ISL_632552	Human	Dutch COVID-19 response team	B.1.78	One month ago	Europe		Erasmus Medical Center		2020-09-25	Bas Oude Munnink et al
Spain/AR-IBV-98008066/2020	G	93	20A	Spain	Spain	Aragon	Aragon	EPI_ISL_654424	Human	Servicio de Microbiolog√≠a, Hospital Miguel Servet, Zaragoza	B.1	One week ago	Europe	Female	SeqCOVID-SPAIN consortium/IBV(CSIC)		2020-09-30	Antonio Rezusta L√≥pez et al	Zaragoza
CzechRepublic/NRL_9678/2020	G	78	20A	Czech Republic	Czech Republic	Southern Bohemia Region	Southern Bohemia Region	EPI_ISL_626600	Human	The National Institute of Public Health	B.1.5	One month ago	Europe	Female	State Veterinary Institute Prague		2020-09-30	Nagy et al	Dobr√° Voda
Netherlands/ZH-EMC-759/2020	G		20A	Netherlands	Netherlands	South Holland	South Holland	EPI_ISL_632596	Human	Dutch COVID-19 response team	B.1.78	One month ago	Europe		Erasmus Medical Center		2020-09-30	Bas Oude Munnink et al
Ireland/CO-NVRL-75IRL24658/2020	G		20A	Ireland	Ireland	Cork	Cork	EPI_ISL_671871	Human	National Virus Reference Laboratory	B.1.5	3-7 days ago	Europe	Male	National Virus Reference Laboratory		2020-10-06	Michael Carr et al
Netherlands/ZH-EMC-746/2020	G		20A	Netherlands	Netherlands	South Holland	South Holland	EPI_ISL_632587	Human	Dutch COVID-19 response team	B.1.78	One month ago	Europe		Erasmus Medical Center		2020-10-08	Bas Oude Munnink et al
CzechRepublic/NRL_9899/2020	G	34	20A	Czech Republic	Czech Republic	Plze≈à Region	Plze≈à Region	EPI_ISL_626622	Human	The National Institute of Public Health	B.1.5	One month ago	Europe	Male	State Veterinary Institute Prague		2020-10-12	Nagy et al
CzechRepublic/NRL_9891/2020	G	76	20A	Czech Republic	Czech Republic	Central Bohemian Region	Central Bohemian Region	EPI_ISL_626619	Human	The National Institute of Public Health	B.1.5	One month ago	Europe	Female	State Veterinary Institute Prague		2020-10-12	Nagy et al	Ben√°tky nad Jizerou
Germany/NW-HHU-326/2020	G		20A	Germany	Germany	North Rhine Westphalia	North Rhine Westphalia	EPI_ISL_666627	Human	ZOTZ KLIMAS MVZ D√ºsseldorf-Centrum GbR √úBAG f√ºr Labormedizin, Genetik, Zytologie, Pathologie	B.1.5	3-7 days ago	Europe		Center of Medical Microbiology, Virology, and Hospital Hygiene, University of Duesseldorf		2020-10-12	Maximilian Damagnez et al	Duesseldorf
Ireland/D-NVRL-75IRL88687/2020	G		20A	Ireland	Ireland	Dublin	Dublin	EPI_ISL_671899	Human	National Virus Reference Laboratory	B.1.5	3-7 days ago	Europe	Female	National Virus Reference Laboratory		2020-10-13	Michael Carr et al
Netherlands/ZH-EMC-797/2020	G		20A	Netherlands	Netherlands	South Holland	South Holland	EPI_ISL_632676	Human	Dutch COVID-19 response team	B.1.78	One month ago	Europe		Erasmus Medical Center		2020-10-14	Bas Oude Munnink et al
CzechRepublic/NRL-9990/2020	G	32	20A	Czech Republic	Czech Republic	Prague	Prague	EPI_ISL_660560	Human	The National Institute of Public Health	B.1.5	One week ago	Europe	Female	State Veterinary Institute Prague		2020-10-15	Nagy et al
Netherlands/ZH-EMC-879/2020	G		20A	Netherlands	Netherlands	South Holland	South Holland	EPI_ISL_632759	Human	Dutch COVID-19 response team	B.1.78	One month ago	Europe		Erasmus Medical Center		2020-10-16	Bas Oude Munnink et al
Norway/4549/2020	G		20A	Norway	Norway	Vestfold Og Telemark	Vestfold Og Telemark	EPI_ISL_635103	Human	Vestfold Hospital, Toensberg Department of Microbiology	B.1.5	One month ago	Europe		Norwegian Institute of Public Health, Department of Virology		2020-10-18	Kathrine Stene-Johansen et al
CzechRepublic/NRL-10145/2020	G	49	20A	Czech Republic	Czech Republic	Prague	Prague	EPI_ISL_660571	Human	The National Institute of Public Health	B.1.5	One week ago	Europe	Female	State Veterinary Institute Prague		2020-10-20	Nagy et al
CzechRepublic/NRL-10176/2020	G	35	20A	Czech Republic	Czech Republic	Central Bohemian Region	Central Bohemian Region	EPI_ISL_660566	Human	The National Institute of Public Health	B.1.5	One week ago	Europe	Female	State Veterinary Institute Prague		2020-10-20	Nagy et al	√önƒõtice
CzechRepublic/NRL-10218/2020	G	53	20A	Czech Republic	Czech Republic	Prague	Prague	EPI_ISL_660587	Human	The National Institute of Public Health	B.1.5	One week ago	Europe	Female	State Veterinary Institute Prague		2020-10-21	Nagy et al
CzechRepublic/NRL-10213/2020	G	33	20A	Czech Republic	Czech Republic	Prague	Prague	EPI_ISL_660586	Human	The National Institute of Public Health	B.1.5	One week ago	Europe	Female	State Veterinary Institute Prague		2020-10-21	Nagy et al
CzechRepublic/NRL-10225/2020	G	53	20A	Czech Republic	Czech Republic	Prague	Prague	EPI_ISL_660588	Human	The National Institute of Public Health	B.1.98	One week ago	Europe	Female	State Veterinary Institute Prague		2020-10-21	Nagy et al
Netherlands/LI-EMC-100/2020	G		20A	Netherlands	Netherlands	Limburg	Limburg	EPI_ISL_632761	Human	Dutch COVID-19 response team	B.1.78	One month ago	Europe		Erasmus Medical Center		2020-10-21	Bas Oude Munnink et al
CzechRepublic/NRL-10273/2020	G	70	20A	Czech Republic	Czech Republic	Prague	Prague	EPI_ISL_660595	Human	The National Institute of Public Health	B.1.5	One week ago	Europe	Male	State Veterinary Institute Prague		2020-10-22	Nagy et al
Belgium/ULG-10525/2020	G	36	20A	Belgium	Belgium	Li√®ge	Li√®ge	EPI_ISL_626327	Human	Department of Clinical Microbiology	B.1.78	One month ago	Europe	Male	GIGA Medical Genomics		2020-10-23	Keith Durkin et al
Belgium/ULG-10587/2020	G	49	20A	Belgium	Belgium	Li√®ge	Li√®ge	EPI_ISL_626302	Human	Department of Clinical Microbiology	B.1.78	One month ago	Europe	Female	GIGA Medical Genomics		2020-10-23	Keith Durkin et al
Netherlands/ZH-EMC-863/2020	G		20A	Netherlands	Netherlands	South Holland	South Holland	EPI_ISL_632748	Human	Dutch COVID-19 response team	B.1.78	One month ago	Europe		Erasmus Medical Center		2020-10-23	Bas Oude Munnink et al
Belgium/ULG-10637/2020	G	87	20A	Belgium	Belgium	Li√®ge	Li√®ge	EPI_ISL_636615	Human	Department of Clinical Microbiology	B.1.78	One month ago	Europe	Female	GIGA Medical Genomics		2020-10-25	Keith Durkin et al
Belgium/ULG-10630/2020	G	30	20A	Belgium	Belgium	Li√®ge	Li√®ge	EPI_ISL_636609	Human	Department of Clinical Microbiology	B.1.78	One month ago	Europe	Female	GIGA Medical Genomics		2020-10-26	Keith Durkin et al
Sweden/20-53291/2020	G	76	20A	Sweden	Sweden	Sormland	Sormland	EPI_ISL_661295	Human	Unilabs	B.1.177	One week ago	Europe	Female	The Public Health Agency of Sweden		2020-10-26	Department of Microbiology et al
Sweden/20-53295/2020	G	98	20A	Sweden	Sweden	Sormland	Sormland	EPI_ISL_661298	Human	Unilabs	B.1.177	One week ago	Europe	Female	The Public Health Agency of Sweden		2020-10-26	Department of Microbiology et al
Belgium/ULG-10640/2020	G	68	20A	Belgium	Belgium	Li√®ge	Li√®ge	EPI_ISL_636618	Human	Department of Clinical Microbiology	B.1.78	One month ago	Europe	Female	GIGA Medical Genomics		2020-10-27	Keith Durkin et al
Italy/APU-IZSPB_316PT/2020	G	47	20A	Italy	Italy	Apulia	Apulia	EPI_ISL_653810	Human	I.R.C.C.S. "S. De Bellis" - Ente Ospedaliero	B.1.5	One month ago	Europe	Male	Istituto Zooprofilattico Sperimentale della Puglia e della Basilicata		2020-10-31	Parisi A. et al	Brindisi
Ireland/CO-NVRL-20IRL79223/2020	G		20A	Ireland	Ireland	Cork	Cork	EPI_ISL_671866	Human	National Virus Reference Laboratory	B.1.5	3-7 days ago	Europe	Female	National Virus Reference Laboratory		2020-11-01	Michael Carr et al
Italy/APU-IZSPB_289PT/2020	G	38	20A	Italy	Italy	Apulia	Apulia	EPI_ISL_653780	Human	I.R.C.C.S. "S. De Bellis" - Ente Ospedaliero	B.1.5	One month ago	Europe	Male	Istituto Zooprofilattico Sperimentale della Puglia e della Basilicata		2020-11-02	Parisi A. et al	Brindisi
Italy/APU-IZSPB_301PT/2020	G	60	20A	Italy	Italy	Apulia	Apulia	EPI_ISL_653795	Human	I.R.C.C.S. "S. De Bellis" - Ente Ospedaliero	B.1.5.12	One month ago	Europe	Female	Istituto Zooprofilattico Sperimentale della Puglia e della Basilicata		2020-11-03	Parisi A. et al	Bari
Belgium/ULG-10861/2020	G	22	20A	Belgium	Belgium	Li√®ge	Li√®ge	EPI_ISL_678405	Human	Department of Clinical Microbiology	B.1.78	1-2 days ago	Europe	Male	GIGA Medical Genomics		2020-11-13	Keith Durkin et al
Belgium/ULG-10860/2020	G	24	20A	Belgium	Belgium	Li√®ge	Li√®ge	EPI_ISL_678404	Human	Department of Clinical Microbiology	B.1.78	1-2 days ago	Europe	Female	GIGA Medical Genomics		2020-11-13	Keith Durkin et al
Sweden/20-53492/2020	G	58	20A	Sweden	Sweden	Vastmanland	Vastmanland	EPI_ISL_661303	Human	Klinisk mikrobiologi	B.1.177	One week ago	Europe	Female	The Public Health Agency of Sweden		2020-11-13	Department of Microbiology et al
Belgium/ULG-10784/2020	G	58	20A	Belgium	Belgium	Li√®ge	Li√®ge	EPI_ISL_661220	Human	Department of Clinical Microbiology	B.1.78	One week ago	Europe	Female	GIGA Medical Genomics		2020-11-16	Keith Durkin et al
England/CAMB-1BB443/2020	G		20A	United Kingdom	United Kingdom	England	England	EPI_ISL_665008	Human	Department of Pathology, University of Cambridge	B.1.177	One week ago	Europe		COVID-19 Genomics UK (COG-UK) Consortium		2020-11-16	Aminu S. Jahun et al
Belgium/ULG-10939/2020	G	27	20A	Belgium	Belgium	Li√®ge	Li√®ge	EPI_ISL_678478	Human	Department of Clinical Microbiology	B.1.78	1-2 days ago	Europe	Female	GIGA Medical Genomics		2020-11-24	Keith Durkin et al
USA/CA-ALSR-2015/2020	G		20A	USA	USA	California	California	EPI_ISL_635306	Human	San Diego County Public Health Laboratory	B.1.5	One month ago	North America		Andersen lab at Scripps Research		2020-05-09	SEARCH Alliance San Diego with Tracy Basler et al	San Diego
Mexico/BCN-ALSR-2466/2020	G		20A	Mexico	Mexico	Baja California	Baja California	EPI_ISL_635487	Human	Centro de Diagn‚àö‚â•stico COVID-19 UABC Tijuana	B.1.5	One month ago	North America		Andersen lab at Scripps Research		2020-05-19	SEARCH Alliance San Diego with Idanya Rub√≠ Seraf√≠n Higuera et al	Tijuana
USA/CA-ALSR-3730/2020	G		20A	USA	USA	California	California	EPI_ISL_636171	Human	San Diego County Public Health Laboratory	B.1.5	One month ago	North America		Andersen lab at Scripps Research		2020-06-05	SEARCH Alliance San Diego with Tracy Basler et al	San Diego
Mexico/GRO-InDRE-91/2020	G	46	20A	Mexico	Mexico	Guerrero	Guerrero	EPI_ISL_658896	Human	Instituto de Diagnostico y Referencia Epidemiologicos (INDRE)	B.1	One week ago	North America	Female	Instituto de Diagnostico y Referencia Epidemiologicos (INDRE)		2020-06-08	Ernesto Ramirez-Gonzalez et al
Mexico/BCN-ALSR-2511/2020	G		20A	Mexico	Mexico	Baja California	Baja California	EPI_ISL_635516	Human	Centro de Diagn‚àö‚â•stico COVID-19 UABC Tijuana	B.1.5	One month ago	North America		Andersen lab at Scripps Research		2020-06-12	SEARCH Alliance San Diego with Idanya Rub√≠ Seraf√≠n Higuera et al	Tijuana
Mexico/BCN-ALSR-3639/2020	G		20B	Mexico	Mexico	Sonora	Sonora	EPI_ISL_636120	Human	Sharp HealthCare Laboratory	B.1.1	One month ago	North America		Andersen lab at Scripps Research		2020-06-12	SEARCH Alliance San Diego with Aaron Harding et al	San Luis Rio Colorado
USA/NY-Wadsworth-161631-01/2020	G	65	20A	USA	USA	New York	New York	EPI_ISL_676988	Human	Wadsworth Center, New York State Department.of Health	B.1.5	3-7 days ago	North America	Male	Wadsworth Center, New York State Department.of Health		2020-07-06	Kirsten St. George et al	Cattaraugus County
Mexico/BCN-ALSR-2569/2020	G		20A	Mexico	Mexico	Baja California	Baja California	EPI_ISL_635570	Human	Centro de Diagn‚àö‚â•stico COVID-19 UABC Tijuana	B.1.5.27	One month ago	North America		Andersen lab at Scripps Research		2020-07-08	SEARCH Alliance San Diego with Idanya Rub√≠ Seraf√≠n Higuera et al	Tijuana
USA/CA-ALSR-2308/2020	G		20A	USA	USA	California	California	EPI_ISL_635423	Human	San Diego County Public Health Laboratory	B.1.5	One month ago	North America		Andersen lab at Scripps Research		2020-07-09	SEARCH Alliance San Diego with Tracy Basler et al	San Diego
Mexico/GRO-InDRE-92/2020	G	47	20A	Mexico	Mexico	Guerrero	Guerrero	EPI_ISL_658899	Human	Instituto de Diagnostico y Referencia Epidemiologicos (INDRE)	B.1	One week ago	North America	Female	Instituto de Diagnostico y Referencia Epidemiologicos (INDRE)		2020-07-18	Gisela Barrera-Badillo et al
USA/IL-NM-1708/2020	G		20A	USA	USA	Illinois	Illinois	EPI_ISL_626543	Human	Northwestern Memorial Hospital	B.1.5	One month ago	North America		Ozer Lab		2020-07-24	Ramon Lorenzo-Redondo et al A	Chicago
USA/OR-OHSU-2039/2020	G	43	20A	USA	USA	Oregon	Oregon	EPI_ISL_667100	Human	OHSU Lab Services Molecular Microbiology Lab	B.1.5	3-7 days ago	North America	Male	Oregon SARS-CoV-2 Genome Sequencing Center		2020-08-01	Brendan L. O'Connell et al	Multnomah County
USA/CO-CDPHE-2008060288/2020	G		20A	USA	USA	Colorado	Colorado	EPI_ISL_677298	Human	Colorado Department of Public Health and Environment	B.1.5.27	3-7 days ago	North America		Colorado Department of Puplic Health and Environment		2020-08-05	Laura Bankers et al
USA/CA-ALSR-3479/2020	G		20A	USA	USA	California	California	EPI_ISL_636048	Human	San Diego County Public Health Laboratory	B.1.5	One month ago	North America		Andersen lab at Scripps Research		2020-08-11	SEARCH Alliance San Diego with Tracy Basler et al	San Diego
USA/CA-ALSR-3229/2020	G		20A	USA	USA	California	California	EPI_ISL_635925	Human	San Diego County Public Health Laboratory	B.1.5.24	One month ago	North America		Andersen lab at Scripps Research		2020-08-19	SEARCH Alliance San Diego with Tracy Basler et al	San Diego
USA/CA-ALSR-3166/2020	G		20A	USA	USA	California	California	EPI_ISL_635894	Human	San Diego County Public Health Laboratory	B.1.5.24	One month ago	North America		Andersen lab at Scripps Research		2020-08-19	SEARCH Alliance San Diego with Tracy Basler et al	San Diego
USA/CA-ALSR-3092/2020	G		20A	USA	USA	California	California	EPI_ISL_635844	Human	San Diego County Public Health Laboratory	B.1.5.27	One month ago	North America		Andersen lab at Scripps Research		2020-08-20	SEARCH Alliance San Diego with Tracy Basler et al	San Diego
USA/CA-ALSR-3145/2020	G		20A	USA	USA	California	California	EPI_ISL_635875	Human	San Diego County Public Health Laboratory	B.1.5.27	One month ago	North America		Andersen lab at Scripps Research		2020-08-20	SEARCH Alliance San Diego with Tracy Basler et al	San Diego
USA/MS-CDC-6513/2020	G	56	20A	USA	USA	Mississippi	Mississippi	EPI_ISL_648037	Human	MS Public Health Laboratory	B.1.5	One month ago	North America	Female	Pathogen Discovery, Respiratory Viruses Branch, Division of Viral Diseases, Centers for Disease Control and Prevention		2020-08-22	Yan Li et al B		MW279455.1
USA/NJ-OHSU-2657/2020	G	28	20A	USA	USA	New Jersey	New Jersey	EPI_ISL_667275	Human	OHSU Lab Services Molecular Microbiology Lab	B.1.5.27	3-7 days ago	North America	Female	Oregon SARS-CoV-2 Genome Sequencing Center		2020-08-24	Brendan L. O'Connell et al	Hudson County
USA/NY-NYCPHL-000969/2020	G	24	20A	USA	USA	New York	New York	EPI_ISL_633000	Human	DOHMH Jamaica	B.1	One month ago	North America	Female	New York City Public Health Laboratory		2020-08-25	Jade Wang et al	New York City
USA/OR-OHSU-2701/2020	G	64	20A	USA	USA	Oregon	Oregon	EPI_ISL_667287	Human	OHSU Lab Services Molecular Microbiology Lab	B.1.107	3-7 days ago	North America	Female	Oregon SARS-CoV-2 Genome Sequencing Center		2020-08-26	Brendan L. O'Connell et al	Multnomah County
USA/MT-RML-22/2020	G	75	20A	USA	USA	Montana	Montana	EPI_ISL_648822	Human	Virus Ecology Section, RML	B.1	One month ago	North America	Male	Virus Ecology Section, RML		2020-08-30	van Doremalen et al	Ravalli County	MW221270.1
USA/NY-NYCPHL-000990/2020	G	34	20A	USA	USA	New York	New York	EPI_ISL_633016	Human	DOHMH Chelsea	B.1.5	One month ago	North America	Male	New York City Public Health Laboratory		2020-08-31	Jade Wang et al	New York City
USA/CA-ALSR-2974/2020	G		20A	USA	USA	California	California	EPI_ISL_635764	Human	San Diego County Public Health Laboratory	B.1.5.27	One month ago	North America		Andersen lab at Scripps Research		2020-09-02	SEARCH Alliance San Diego with Tracy Basler et al	San Diego
USA/OR-OHSU-2820/2020	G	1	20A	USA	USA	Oregon	Oregon	EPI_ISL_667328	Human	OHSU Lab Services Molecular Microbiology Lab	B.1.5	3-7 days ago	North America	Male	Oregon SARS-CoV-2 Genome Sequencing Center		2020-09-02	Brendan L. O'Connell et al	Washington County OR
USA/CO-CDPHE-2009042555/2020	G		20A	USA	USA	Colorado	Colorado	EPI_ISL_677642	Human	Colorado Department of Public Health and Environment	B.1.5	3-7 days ago	North America		Colorado Department of Puplic Health and Environment		2020-09-03	Laura Bankers et al
USA/NM-NMDOH-2020328986/2020	G	59	20A	USA	USA	New Mexico	New Mexico	EPI_ISL_644594	Human	New Mexico Department of Health Scientific Laboratory	B.1.5	One month ago	North America	Female	New Mexico Department of Health Scientific Laboratory		2020-09-04	Ellie Johnson et al		MW268710.1
USA/CA-ALSR-3263/2020	G		20A	USA	USA	California	California	EPI_ISL_635938	Human	San Diego County Public Health Laboratory	B.1.5.27	One month ago	North America		Andersen lab at Scripps Research		2020-09-07	SEARCH Alliance San Diego with Tracy Basler et al	San Diego
USA/CO-CDPHE-2009090328/2020	G		20A	USA	USA	Colorado	Colorado	EPI_ISL_677646	Human	Colorado Department of Public Health and Environment	B.1.5	3-7 days ago	North America		Colorado Department of Puplic Health and Environment		2020-09-08	Laura Bankers et al
USA/CO-CDPHE-2009090314/2020	G		20A	USA	USA	Colorado	Colorado	EPI_ISL_677643	Human	Colorado Department of Public Health and Environment	B.1.5	3-7 days ago	North America		Colorado Department of Puplic Health and Environment		2020-09-08	Laura Bankers et al
USA/CO-CDPHE-2009090320/2020	G		20A	USA	USA	Colorado	Colorado	EPI_ISL_677644	Human	Colorado Department of Public Health and Environment	B.1.5	3-7 days ago	North America		Colorado Department of Puplic Health and Environment		2020-09-08	Laura Bankers et al
USA/TX-DSHS-1243/2020	G		20A	USA	USA	Texas	Texas	EPI_ISL_676619	Human	Texas Department of State Health Services	B.1.5.25	3-7 days ago	North America		Texas Department of State Health Services		2020-09-08	Rashmi Tuladhar et al	Titus County
USA/OR-OHSU-2994/2020	G	75	20A	USA	USA	Oregon	Oregon	EPI_ISL_667452	Human	OHSU Lab Services Molecular Microbiology Lab	B.1	3-7 days ago	North America	Male	Oregon SARS-CoV-2 Genome Sequencing Center		2020-09-11	Brendan L. O'Connell et al	Multnomah County
USA/CO-CDPHE-2009151301/2020	G		20A	USA	USA	Colorado	Colorado	EPI_ISL_677316	Human	Colorado Department of Public Health and Environment	B.1.139	3-7 days ago	North America		Colorado Department of Puplic Health and Environment		2020-09-14	Laura Bankers et al
USA/CO-CDPHE-2009164036/2020	G		20A	USA	USA	Colorado	Colorado	EPI_ISL_677654	Human	Colorado Department of Public Health and Environment	B.1.5	3-7 days ago	North America		Colorado Department of Puplic Health and Environment		2020-09-16	Laura Bankers et al
USA/CO-CDPHE-2009163566/2020	G		20A	USA	USA	Colorado	Colorado	EPI_ISL_677650	Human	Colorado Department of Public Health and Environment	B.1.5	3-7 days ago	North America		Colorado Department of Puplic Health and Environment		2020-09-16	Laura Bankers et al
USA/MN-GMF-21861/2020	G		20A	USA	USA	Minnesota	Minnesota	EPI_ISL_660842	Human	Gundersen Molecular Diagnostics Laboratory	B.1.35	One week ago	North America		Kabara Cancer Research Institute		2020-09-22	Craig S. Richmond et al A	Winona County
USA/CA-CZB-11880/2020	G		20A	USA	USA	California	California	EPI_ISL_672277	Human	Santa Clara County Public Health Laboratory	B.1.5	3-7 days ago	North America		Chan-Zuckerberg Biohub		2020-09-29	CZB Cliahub Consortium et al B	Santa Clara County
USA/UT-UPHL-201106352/2020	G		20A	USA	USA	Utah	Utah	EPI_ISL_628956	Human	Utah Public Health Laboratory	B.1.5.27	One month ago	North America		Utah Public Health Laboratory		2020-09-30	Erin Young et al
USA/CA-CZB-11886/2020	G		20A	USA	USA	California	California	EPI_ISL_672280	Human	Santa Clara County Public Health Laboratory	B.1.5	3-7 days ago	North America		Chan-Zuckerberg Biohub		2020-09-30	CZB Cliahub Consortium et al B	Santa Clara County
USA/VA-DCLS-1932/2020	G		20A	USA	USA	Virginia	Virginia	EPI_ISL_644923	Human	Virginia DCLS	B.1.5	One month ago	North America		Virginia DCLS		2020-09-30	Virginia DCLS et al		MW280460.1
USA/IL-UW-2115/2020	G		20A	USA	USA	Illinois	Illinois	EPI_ISL_677520	Human	University of Wisconsin-Madison AIDS Vaccine Research Laboratories	B.1.5	3-7 days ago	North America		University of Wisconsin-Madison AIDS Vaccine Research Laboratories		2020-10-01	Gage Moreno et al A	Winnebago County IL
USA/IA-GMF-23647/2020	G		20A	USA	USA	Iowa	Iowa	EPI_ISL_660879	Human	Gundersen Clinical Microbiology Laboratory	B.1.139	One week ago	North America		Kabara Cancer Research Institute		2020-10-02	Craig S. Richmond et al A	Allamakee County
USA/CA-CZB-11900/2020	G		20A	USA	USA	California	California	EPI_ISL_672285	Human	Santa Clara County Public Health Laboratory	B.1.5	3-7 days ago	North America		Chan-Zuckerberg Biohub		2020-10-03	CZB Cliahub Consortium et al B	Santa Clara County
USA/OR-OHSU-3137/2020	G		20A	USA	USA	Oregon	Oregon	EPI_ISL_667492	Human	OHSU Lab Services Molecular Microbiology Lab	B.1.5	3-7 days ago	North America		Oregon SARS-CoV-2 Genome Sequencing Center		2020-10-03	Brendan L. O'Connell et al
USA/UT-UPHL-201117658/2020	G		20A	USA	USA	Utah	Utah	EPI_ISL_634930	Human	Utah Public Health Laboratory	B.1.5.25	One month ago	North America		Utah Public Health Laboratory		2020-10-06	Erin L. Young et al
USA/UT-UPHL-201122052/2020	G		20A	USA	USA	Utah	Utah	EPI_ISL_634931	Human	Utah Public Health Laboratory	B.1.5.25	One month ago	North America		Utah Public Health Laboratory		2020-10-06	Erin L. Young et al		MW265621.1
USA/UT-UPHL-201107060/2020	G		20A	USA	USA	Utah	Utah	EPI_ISL_634929	Human	Utah Public Health Laboratory	B.1.5.25	One month ago	North America		Utah Public Health Laboratory		2020-10-06	Erin L. Young et al		MW265606.1
USA/IA-GMF-24556/2020	G		20A	USA	USA	Iowa	Iowa	EPI_ISL_660902	Human	Gundersen Molecular Diagnostics Laboratory	B.1	One week ago	North America		Kabara Cancer Research Institute		2020-10-07	Craig S. Richmond et al A	Fayette County
USA/UT-UPHL-201113771/2020	G		20A	USA	USA	Utah	Utah	EPI_ISL_628932	Human	Utah Public Health Laboratory	B.1.5.27	One month ago	North America		Utah Public Health Laboratory		2020-10-08	Erin Young et al		MW241377.1
USA/UT-UPHL-201123731/2020	G		20A	USA	USA	Utah	Utah	EPI_ISL_628950	Human	Utah Public Health Laboratory	B.1.5.27	One month ago	North America		Utah Public Health Laboratory		2020-10-09	Erin Young et al
USA/UT-UPHL-201109604/2020	G		20A	USA	USA	Utah	Utah	EPI_ISL_628952	Human	Utah Public Health Laboratory	B.1.5.25	One month ago	North America		Utah Public Health Laboratory		2020-10-12	Erin Young et al		MW241373.1
USA/CA-ALSR-4282/2020	G		20A	USA	USA	California	California	EPI_ISL_648934	Human	San Diego County Public Health Laboratory	B.1.5.27	One month ago	North America		Andersen lab at Scripps Research		2020-10-13	SEARCH Alliance San Diego with Tracy Basler et al	San Diego
USA/MD-MDH-0274/2020	G		20A	USA	USA	Maryland	Maryland	EPI_ISL_629055	Human	Maryland Public Health Laboratory	B.1.5	One month ago	North America		Maryland Public Health Laboratory		2020-10-13	Maryland Department of Health Laboratories Administration et al		MW240738.1
USA/VA-DCLS-2011/2020	G		20A	USA	USA	Virginia	Virginia	EPI_ISL_677164	Human	Virginia Division of Consolidated Laboratory Services	B.1.5	3-7 days ago	North America		Virginia Division of Consolidated Laboratory Services		2020-10-14	Virginia DCLS et al
USA/IA-GMF-25923/2020	G		20A	USA	USA	Iowa	Iowa	EPI_ISL_660939	Human	Gundersen Molecular Diagnostics Laboratory	B.1	One week ago	North America		Kabara Cancer Research Institute		2020-10-15	Craig S. Richmond et al A	Clayton County
USA/IL-UW-2071/2020	G		20C	USA	USA	Illinois	Illinois	EPI_ISL_677476	Human	University of Wisconsin-Madison AIDS Vaccine Research Laboratories	B.1	3-7 days ago	North America		University of Wisconsin-Madison AIDS Vaccine Research Laboratories		2020-10-18	Gage Moreno et al A	Winnebago County IL
USA/IL-UW-2080/2020	G		20A	USA	USA	Illinois	Illinois	EPI_ISL_677485	Human	University of Wisconsin-Madison AIDS Vaccine Research Laboratories	B.1.152	3-7 days ago	North America		University of Wisconsin-Madison AIDS Vaccine Research Laboratories		2020-10-19	Gage Moreno et al A	Winnebago County IL
USA/CA-ALSR-4464/2020	G		20A	USA	USA	California	California	EPI_ISL_649046	Human	San Diego County Public Health Laboratory	B.1.5	One month ago	North America		Andersen lab at Scripps Research		2020-10-20	SEARCH Alliance San Diego with Tracy Basler et al	San Diego
USA/CA-ALSR-4433/2020	G		20A	USA	USA	California	California	EPI_ISL_649027	Human	San Diego County Public Health Laboratory	B.1.5	One month ago	North America		Andersen lab at Scripps Research		2020-10-22	SEARCH Alliance San Diego with Tracy Basler et al	San Diego
USA/WI-UW-2193/2020	G		20A	USA	USA	Wisconsin	Wisconsin	EPI_ISL_677596	Human	University of Wisconsin-Madison AIDS Vaccine Research Laboratories	B.1.139	3-7 days ago	North America		University of Wisconsin-Madison AIDS Vaccine Research Laboratories		2020-10-25	Gage Moreno et al A	Dane County
USA/CA-CZB-13121/2020	G		20A	USA	USA	California	California	EPI_ISL_672413	Human	Madera County Department of Public Health	B.1.5	3-7 days ago	North America		Chan-Zuckerberg Biohub		2020-10-26	CZB Cliahub Consortium et al B	Madera County
USA/MN-MDH-1985/2020	G		20A	USA	USA	Minnesota	Minnesota	EPI_ISL_634859	Human	Minnesota Department of Health, Public Health Laboratory	B.1.139	One month ago	North America		Minnesota Department of Health, Public Health Laboratory		2020-10-27	Matt Plumb et al		MW246608.1
USA/MI-UM-10036663751/2020	G		20A	USA	USA	Michigan	Michigan	EPI_ISL_650081	Human	University of Michigan Clinical Microbiology Laboratory	B.1.5.27	One month ago	North America		Lauring Lab, University of Michigan, Department of Microbiology and Immunology		2020-10-28	Valesano et al
USA/OR-OHSU-3865/2020	G	32	20A	USA	USA	Oregon	Oregon	EPI_ISL_667514	Human	OHSU Lab Services Molecular Microbiology Lab	B.1.5.27	3-7 days ago	North America	Male	Oregon SARS-CoV-2 Genome Sequencing Center		2020-10-29	Brendan L. O'Connell et al
USA/MN-MDH-2002/2020	G		20A	USA	USA	Minnesota	Minnesota	EPI_ISL_644933	Human	Essentia Health-St. Mary's Medical Center	B.1	One month ago	North America		Minnesota Department of Health, Public Health Laboratory		2020-10-29	Matt Plumb et al		MW279326.1
USA/WI-UW-2098/2020	G		20A	USA	USA	Wisconsin	Wisconsin	EPI_ISL_677503	Human	University of Wisconsin-Madison AIDS Vaccine Research Laboratories	B.1	3-7 days ago	North America		University of Wisconsin-Madison AIDS Vaccine Research Laboratories		2020-10-30	Gage Moreno et al A	Dane County
USA/CA-ALSR-4419/2020	G		20A	USA	USA	California	California	EPI_ISL_649018	Human	San Diego County Public Health Laboratory	B.1.5.26	One month ago	North America		Andersen lab at Scripps Research		2020-10-30	SEARCH Alliance San Diego with Tracy Basler et al	San Diego
Mexico/SLP-InDRE-77/2020	G	66	20A	Mexico	Mexico	San Luis Potosi	San Luis Potosi	EPI_ISL_660068	Human	Instituto de Diagnostico y Referencia Epidemiologicos (INDRE)	B.1.5	One week ago	North America	Male	Instituto de diagn√≥stico y Referencia Epidemiologicos (INDRE) Departamento de Virolog√≠a		2020-11-01	Gisela Barrera-Badillo et al
USA/CA-CZB-13331/2020	G		20A	USA	USA	California	California	EPI_ISL_672437	Human	Santa Clara County Public Health Laboratory	B.1.5	3-7 days ago	North America		Chan-Zuckerberg Biohub		2020-11-02	CZB Cliahub Consortium et al B	Santa Clara County
Mexico/AGS-InDRE-79/2020	G	28	20A	Mexico	Mexico	Aguascalientes	Aguascalientes	EPI_ISL_658865	Human	Instituto de Diagnostico y Referencia Epidemiologicos (INDRE)	B.1.5	One week ago	North America	Male	Instituto de Diagnostico y Referencia Epidemiologicos (INDRE)		2020-11-02	Gisela Barrera-Badillo et al
Mexico/AGS-InDRE-81/2020	G	48	20A	Mexico	Mexico	Aguascalientes	Aguascalientes	EPI_ISL_658870	Human	Instituto de Diagnostico y Referencia Epidemiologicos (INDRE)	B.1.5	One week ago	North America	Female	Instituto de Diagnostico y Referencia Epidemiologicos (INDRE)		2020-11-02	Gisela Barrera-Badillo et al
Mexico/AGS-InDRE-85/2020	G	41	20A	Mexico	Mexico	Aguascalientes	Aguascalientes	EPI_ISL_658880	Human	Instituto de Diagnostico y Referencia Epidemiologicos (INDRE)	B.1.5	One week ago	North America	Male	Instituto de Diagnostico y Referencia Epidemiologicos (INDRE)		2020-11-02	Ernesto Ramirez-Gonzalez et al
USA/WI-UW-2095/2020	G		20A	USA	USA	Wisconsin	Wisconsin	EPI_ISL_677500	Human	University of Wisconsin-Madison AIDS Vaccine Research Laboratories	B.1.5	3-7 days ago	North America		University of Wisconsin-Madison AIDS Vaccine Research Laboratories		2020-11-02	Gage Moreno et al A	Dane County
USA/CA-ALSR-4623/2020	G		20A	USA	USA	California	California	EPI_ISL_667043	Human	San Diego County Public Health Laboratory	B.1.5.26	3-7 days ago	North America		Andersen lab at Scripps Research		2020-11-02	SEARCH Alliance San Diego with Tracy Basler et al	San Diego
USA/CA-CZB-13529/2020	G		20A	USA	USA	California	California	EPI_ISL_672048	Human	Madera County Department of Public Health	B.1.5.27	3-7 days ago	North America		Chan-Zuckerberg Biohub		2020-11-03	CZB Cliahub Consortium et al B	Madera County
USA/OR-OHSU-4350/2020	G	62	20A	USA	USA	Oregon	Oregon	EPI_ISL_667550	Human	OHSU Lab Services Molecular Microbiology Lab	B.1.5	3-7 days ago	North America	Female	Oregon SARS-CoV-2 Genome Sequencing Center		2020-11-03	Brendan L. O'Connell et al
Mexico/QRO-InDRE-88/2020	G	44	20A	Mexico	Mexico	Queretaro	Queretaro	EPI_ISL_658888	Human	Instituto de Diagnostico y Referencia Epidemiologicos (INDRE)	B.1.5	One week ago	North America	Female	Instituto de Diagnostico y Referencia Epidemiologicos (INDRE)		2020-11-03	Ernesto Ramirez-Gonzalez et al
USA/WI-GMF-31410/2020	G		20A	USA	USA	Wisconsin	Wisconsin	EPI_ISL_661088	Human	Gundersen Molecular Diagnostics Laboratory	B.1.35	One week ago	North America		Kabara Cancer Research Institute		2020-11-04	Craig S. Richmond et al A	Jackson County WI
USA/OR-OHSU-3997/2020	G	21	20A	USA	USA	Oregon	Oregon	EPI_ISL_667521	Human	OHSU Lab Services Molecular Microbiology Lab	B.1.5	3-7 days ago	North America	Male	Oregon SARS-CoV-2 Genome Sequencing Center		2020-11-06	Brendan L. O'Connell et al
USA/CA-ALSR-4651/2020	G		20A	USA	USA	California	California	EPI_ISL_667057	Human	San Diego County Public Health Laboratory	A.2	3-7 days ago	North America		Andersen lab at Scripps Research		2020-11-06	SEARCH Alliance San Diego with Tracy Basler et al	San Diego
USA/IA-GMF-32028/2020	G		20A	USA	USA	Iowa	Iowa	EPI_ISL_661123	Human	Gundersen Molecular Diagnostics Laboratory	B.1.5	One week ago	North America		Kabara Cancer Research Institute		2020-11-07	Craig S. Richmond et al A	Winneshiek County
USA/IA-GMF-32700/2020	G		20A	USA	USA	Iowa	Iowa	EPI_ISL_661164	Human	Gundersen Molecular Diagnostics Laboratory	B.1.5	One week ago	North America		Kabara Cancer Research Institute		2020-11-09	Craig S. Richmond et al A	Winneshiek County
USA/IA-GMF-32590/2020	G		20A	USA	USA	Iowa	Iowa	EPI_ISL_661156	Human	Gundersen Molecular Diagnostics Laboratory	B.1.139	One week ago	North America		Kabara Cancer Research Institute		2020-11-09	Craig S. Richmond et al A	Allamakee County
USA/WI-GMF-32511/2020	G		20A	USA	USA	Wisconsin	Wisconsin	EPI_ISL_661151	Human	Gundersen Molecular Diagnostics Laboratory	B.1	One week ago	North America		Kabara Cancer Research Institute		2020-11-09	Craig S. Richmond et al A	La Crosse County
USA/MD-MDH-0442/2020	G		20A	USA	USA	Maryland	Maryland	EPI_ISL_666809	Human	Maryland Public Health Laboratory	B.1.5	3-7 days ago	North America		Maryland Public Health Laboratory		2020-11-10	Maryland Department of Health Laboratories Administration et al		MW310452.1
USA/MD-MDH-0439/2020	G		20A	USA	USA	Maryland	Maryland	EPI_ISL_666806	Human	Maryland Public Health Laboratory	B.1.5	3-7 days ago	North America		Maryland Public Health Laboratory		2020-11-10	Maryland Department of Health Laboratories Administration et al		MW310449.1
USA/IA-GMF-33129/2020	G		20A	USA	USA	Iowa	Iowa	EPI_ISL_661170	Human	Gundersen Molecular Diagnostics Laboratory	B.1.5	One week ago	North America		Kabara Cancer Research Institute		2020-11-11	Craig S. Richmond et al A	Clayton County
Australia/NSW2831/2020	G	84	20A	Australia	Australia	New South Wales	New South Wales	EPI_ISL_678354	Human	Area of Virology, Serology and Virology Division (SAViD), New South Wales Health Pathology Randwick	B.1.98	1-2 days ago	Oceania		Virology Research Laboratory; Area of Virology, Serology and Virology Division (SAViD), New South Wales Health Pathology Randwick		2020-04-09	Foster et al	Sydney
Australia/NSW1170/2020	G		20A	Australia	Australia	New South Wales	New South Wales	EPI_ISL_639738	Human	South Eastern Area Laboratory Services (SEALS)	B.1.77	One month ago	Oceania		NSW Health Pathology - Institute of Clinical Pathology and Medical Research; Westmead Hospital; University of Sydney		2020-10-26	CIDM-PH et al. et al	Sydney
NewZealand/20CV0574/2020	G		20A	New Zealand	New Zealand	Auckland	Auckland	EPI_ISL_661259	Human	LabPLUS	B.1	One week ago	Oceania	Male	Institute of Environmental Science and Research (ESR)		2020-11-17	Xiaoyun Ren et al
NewZealand/20CV0571/2020	G		20A	New Zealand	New Zealand	Auckland	Auckland	EPI_ISL_661257	Human	LabPLUS	B.1.177	One week ago	Oceania	Female	Institute of Environmental Science and Research (ESR)		2020-11-17	Xiaoyun Ren et al
NewZealand/20CV0589/2020	G		20A	New Zealand	New Zealand	Auckland	Auckland	EPI_ISL_661263	Human	LabPLUS	B.1.177	One week ago	Oceania	Male	Institute of Environmental Science and Research (ESR)		2020-11-18	Xiaoyun Ren et al
Australia/NSW1209/2020	G		20A	Australia	Australia	New South Wales	New South Wales	EPI_ISL_672574	Human	Histopath	B.1.5	3-7 days ago	Oceania		NSW Health Pathology - Institute of Clinical Pathology and Medical Research; Westmead Hospital; University of Sydney		2020-12-02	CIDM-PH et al. et al	Sydney
Chile/RM-CMM-0039M/2020	G		20A	Chile	Chile	Region Metropolitana de Santiago	Region Metropolitana de Santiago	EPI_ISL_629017	Human	Centro de Biotecnolog√≠a Vegetal, Universidad Andr√©s Bello, Center for Genome Regulation	B.1	One month ago	South America		Center for Mathematical Modeling and Center for Genome Regulation. Santiago, Chile		2020-04-24	Bastias M et al	Santiago
Chile/RM-CMM-0071M/2020	G		20A	Chile	Chile	Region Metropolitana de Santiago	Region Metropolitana de Santiago	EPI_ISL_629019	Human	Centro de Biotecnolog√≠a Vegetal, Universidad Andr√©s Bello, Center for Genome Regulation	B.1	One month ago	South America		Center for Mathematical Modeling and Center for Genome Regulation. Santiago, Chile		2020-05-01	Bastias M et al	Santiago
Colombia/ANT-INS-02/2020	G	62	20A	Colombia	Colombia	Antioquia	Antioquia	EPI_ISL_653748	Human	Instituto Nacional de Salud, Bogot√°, Colombia	B.1	One month ago	South America	Male	Instituto Nacional de Salud, Bogot√°, Colombia		2020-06-04	Katherine Laiton-Donato et al A	Medellin
Colombia/ATL-INS-06/2020	G	71	20A	Colombia	Colombia	Atlantico	Atlantico	EPI_ISL_653757	Human	Instituto Nacional de Salud, Bogot√°, Colombia	B.1	One month ago	South America	Male	Instituto Nacional de Salud, Bogot√°, Colombia		2020-06-26	Katherine Laiton-Donato et al A	Barranquilla
Colombia/DC-INS-3569/2020	G	35	20A	Colombia	Colombia	Bogota	Bogota	EPI_ISL_653755	Human	Instituto Nacional de Salud, Bogot√°, Colombia	B.1.5	One month ago	South America	Male	Instituto Nacional de Salud, Bogot√°, Colombia		2020-06-30	Katherine Laiton-Donato et al A
Colombia/ATL-INS-07/2020	G	30	20A	Colombia	Colombia	Atlantico	Atlantico	EPI_ISL_653760	Human	Instituto Nacional de Salud, Bogot√°, Colombia	B.1.5	One month ago	South America	Male	Instituto Nacional de Salud, Bogot√°, Colombia		2020-07-08	Katherine Laiton-Donato et al A	Barranquilla
Aruba/AW-RIVM-10389/2020	G		20A	Aruba	Aruba	Aruba	Aruba	EPI_ISL_636515	Human	Dutch COVID-19 response team	B.1.5	One month ago	South America		National Institute for Public Health and the Environment (RIVM)		2020-08-05	Adam Meijer et al
Colombia/DC-INS-2553/2020	G	55	20A	Colombia	Colombia	Bogota	Bogota	EPI_ISL_653745	Human	Instituto Nacional de Salud, Bogot√°, Colombia	B.1.5	One month ago	South America	Female	Instituto Nacional de Salud, Bogot√°, Colombia		2020-08-06	Katherine Laiton-Donato et al A
Aruba/AW-RIVM-10390/2020	G		20A	Aruba	Aruba	Aruba	Aruba	EPI_ISL_636516	Human	Dutch COVID-19 response team	B.1.5	One month ago	South America		National Institute for Public Health and the Environment (RIVM)		2020-08-06	Adam Meijer et al
Colombia/DC-INS-2624/2020	G	59	20A	Colombia	Colombia	Bogota	Bogota	EPI_ISL_653746	Human	Instituto Nacional de Salud, Bogot√°, Colombia	B.1.5	One month ago	South America	Female	Instituto Nacional de Salud, Bogot√°, Colombia		2020-08-07	Katherine Laiton-Donato et al A
Colombia/DC-INS-2640/2020	G	41	20A	Colombia	Colombia	Bogota	Bogota	EPI_ISL_653747	Human	Instituto Nacional de Salud, Bogot√°, Colombia	B.1.5	One month ago	South America	Female	Instituto Nacional de Salud, Bogot√°, Colombia		2020-08-07	Katherine Laiton-Donato et al A
Chile/AT-CMM-ATAC15/2020	G		20A	Chile	Chile	Atacama	Atacama	EPI_ISL_626561	Human	Laboratorio de Biolog√≠a Molecular, Facultad de Medicina, Universidad de Atacama, Copiapo, Chile/ FONDAP CRG, Universidad Andr√©s Bello, Santiago, Chile	B.1.5	One month ago	South America	Female	Center for Mathematical Modeling and Center for Genome Regulation. Santiago, Chile		2020-08-07	Echeverr√≠a C et al	Huasco
Curacao/CW-RIVM-10364/2020	G		20A	Curacao	Curacao	Curacao	Curacao	EPI_ISL_636519	Human	Dutch COVID-19 response team	B.1.5	One month ago	South America		National Institute for Public Health and the Environment (RIVM)		2020-08-11	Adam Meijer et al
Curacao/CW-RIVM-10366/2020	G		20A	Curacao	Curacao	Curacao	Curacao	EPI_ISL_636521	Human	Dutch COVID-19 response team	B.1.5	One month ago	South America		National Institute for Public Health and the Environment (RIVM)		2020-08-11	Adam Meijer et al
Curacao/CW-RIVM-10365/2020	G		20A	Curacao	Curacao	Curacao	Curacao	EPI_ISL_636520	Human	Dutch COVID-19 response team	B.1.5	One month ago	South America		National Institute for Public Health and the Environment (RIVM)		2020-08-11	Adam Meijer et al
Aruba/AW-RIVM-10392/2020	G		20A	Aruba	Aruba	Aruba	Aruba	EPI_ISL_636518	Human	Dutch COVID-19 response team	B.1.5	One month ago	South America		National Institute for Public Health and the Environment (RIVM)		2020-08-25	Adam Meijer et al
Colombia/DC-INS-3334/2020	G		20A	Colombia	Colombia	Bogota	Bogota	EPI_ISL_653754	Human	Instituto Nacional de Salud, Bogot√°, Colombia	B.1.5	One month ago	South America	Female	Instituto Nacional de Salud, Bogot√°, Colombia		2020-09-02	Katherine Laiton-Donato et al A
Ecuador/USFQ-231/2020	G	77	20A	Ecuador	Ecuador	Tungurahua	Tungurahua	EPI_ISL_660531	Human	Institute of Microbiology, Universidad San Francisco de Quito	B.1	One week ago	South America	Male	Institute of Microbiology, Universidad San Francisco de Quito		2020-10-01	Sully M√°rquez et al	Ambato
Ecuador/USFQ-402/2020	G		20A	Ecuador	Ecuador	Pastaza	Pastaza	EPI_ISL_660532	Human	Institute of Microbiology, Universidad San Francisco de Quito	B.1	One week ago	South America		Institute of Microbiology, Universidad San Francisco de Quito		2020-10-02	Sully M√°rquez et al	Puyo
Ecuador/USFQ-487/2020	G		20A	Ecuador	Ecuador	Cotopaxi	Cotopaxi	EPI_ISL_660534	Human	Institute of Microbiology, Universidad San Francisco de Quito	B.1	One week ago	South America		Institute of Microbiology, Universidad San Francisco de Quito		2020-10-05	Sully M√°rquez et al	Latacunga
Ecuador/USFQ-485/2020	G		20A	Ecuador	Ecuador	Cotopaxi	Cotopaxi	EPI_ISL_660533	Human	Institute of Microbiology, Universidad San Francisco de Quito	B.1	One week ago	South America		Institute of Microbiology, Universidad San Francisco de Quito		2020-10-05	Sully M√°rquez et al	Latacunga
Ecuador/USFQ-506/2020	G	80	20A	Ecuador	Ecuador	El Oro	El Oro	EPI_ISL_660535	Human	Institute of Microbiology, Universidad San Francisco de Quito	B.1.5	One week ago	South America	Male	Institute of Microbiology, Universidad San Francisco de Quito		2020-10-10	Sully M√°rquez et al	Machala
Ecuador/USFQ-515/2020	G	66	20A	Ecuador	Ecuador	El Oro	El Oro	EPI_ISL_660538	Human	Institute of Microbiology, Universidad San Francisco de Quito	B.1	One week ago	South America	Male	Institute of Microbiology, Universidad San Francisco de Quito		2020-10-10	Sully M√°rquez et al	Machala
Ecuador/USFQ-509/2020	G	56	20A	Ecuador	Ecuador	El Oro	El Oro	EPI_ISL_660536	Human	Institute of Microbiology, Universidad San Francisco de Quito	B.1	One week ago	South America	Female	Institute of Microbiology, Universidad San Francisco de Quito		2020-10-10	Sully M√°rquez et al	Machala
Zimbabwe/ZW-25/2020	GH	36	20C	Zimbabwe	Zimbabwe	Zimbabwe	Zimbabwe	EPI_ISL_647977	Human	National Microbiology Reference Laboratory	B.1	One month ago	Africa	Male	Quadram Institute Bioscience		2020-03-01	Thanh Le Viet et al
Zimbabwe/ZW-29/2020	GH	31	20C	Zimbabwe	Zimbabwe	Zimbabwe	Zimbabwe	EPI_ISL_647978	Human	National Microbiology Reference Laboratory	B.1	One month ago	Africa	Male	Quadram Institute Bioscience		2020-03-01	Thanh Le Viet et al
Mozambique/KRISP-MZ154278/2020	GH	51	20C	Mozambique	Mozambique	Cabo Delgado	Cabo Delgado	EPI_ISL_636975	Human	HP Pemba	B.1.2	One month ago	Africa	Female	KRISP, KZN Research Innovation and Sequencing Platform		2020-07-07	Ismael N et al	Pemba
BurkinaFaso/4053/2020	GH	29	20A	Burkina Faso	Burkina Faso	Hauts-Bassins	Hauts-Bassins	EPI_ISL_660469	Human	Laboratoire de Microbiologie CHU Souro Sanou	B.1	One week ago	Africa	Male	Centre Muraz		2020-08-14	Abdoul-Salam Ouedraogo et al	Bobo Dioulasso
SouthAfrica/NHLS-UCT-GS-1984/2020	GH	46	20C	South Africa	South Africa	Western Cape Province	Western Cape Province	EPI_ISL_640048	Human	D'Almeida Clinic wc DAL	B.1	One month ago	Africa	Female	NHLS/UCT		2020-08-25	Arash Iranzadeh et al	Mossel Bay
BurkinaFaso/2470/2020	GH	25	20A	Burkina Faso	Burkina Faso	Hauts-Bassins	Hauts-Bassins	EPI_ISL_660458	Human	Laboratoire de Microbiologie CHU Souro Sanou	B.1	One week ago	Africa	Male	Centre Muraz		2020-09-11	Abdoul-Salam Ouedraogo et al	Bobo Dioulasso
BurkinaFaso/B06-1219/2020	GH	24	20A	Burkina Faso	Burkina Faso	Sud-Ouest	Sud-Ouest	EPI_ISL_660442	Human	Centre Muraz	B.1	One week ago	Africa	Male	Project group Epidemology of Highly Pathogenic Microorganisms, Robert Koch Institut		2020-10-14	Soumeya Ouangraoua et al	Dano
BurkinaFaso/4057/2020	GH	13	20A	Burkina Faso	Burkina Faso	Cascades	Cascades	EPI_ISL_660470	Human	Laboratoire de Microbiologie CHU Souro Sanou	B.1	One week ago	Africa	Female	Centre Muraz		2020-10-24	Abdoul-Salam Ouedraogo et al	Banfora
Tunisia/53873/2020	GH	34	20A	Tunisia	Tunisia	Ben Arous	Ben Arous	EPI_ISL_654020	Human	Laboratory of Microbiology, National Reference Lab, Charles Nicolle Hospital; 2-University of Tunis ElManar, Faculty of Medicine of Tunis, LR99ES09, Tunis, Tunisia	B.1.160	One week ago	Africa	Male	1-Clinical and Experimental Pharmacology Lab, LR16SP02, National Center of Pharmacovigilance, University of Tunis El Manar, Tunis, Tunisia. 2-Neurodegenerative diseases and psychiatric troubles, LR18SP03, Razi Hospital, University of Tunis El Manar, Tunis, Tunisia. 3- Ministry of Health, National Observatory of New and Emerging Diseases, 1006, Tunis, Tunisia		2020-10-26	Ilhem Boutiba-Ben Boubaker et al
SouthAfrica/KRISP-K004554/2020	GH	42	20C	South Africa	South Africa	KwaZulu-Natal	KwaZulu-Natal	EPI_ISL_660251	Human	NHLS-IALCH	B.1	One week ago	Africa	Female	KRISP, KZN Research Innovation and Sequencing Platform		2020-10-27	Giandhari J et al A	eThekwini
SouthAfrica/KRISP-EC-K005311/2020	GH	35	20C	South Africa	South Africa	KwaZulu-Natal	KwaZulu-Natal	EPI_ISL_678604	Human	NHLS-IALCH	B.1	1-2 days ago	Africa	Female	KRISP, KZN Research Innovation and Sequencing Platform		2020-10-29	Giandhari J et al A	Ugu
Tunisia/55006/2020	GH	39	20C	Tunisia	Tunisia	Ben Arous	Ben Arous	EPI_ISL_632310	Human	1-Laboratory of Microbiology, National Reference Lab, Charles Nicolle Hospital; 2-University of Tunis ElManar, Faculty of Medicine of Tunis, LR99ES09, Tunis, Tunisia	B.1	One month ago	Africa	Female	1-Clinical and Experimental Pharmacology Lab, LR16SP02, National Center of Pharmacovigilance, University of Tunis El Manar, Tunis, Tunisia. 2-Neurodegenerative diseases and psychiatric troubles, LR18SP03, Razi Hospital, University of Tunis El Manar, Tunis, Tunisia. 3- Ministry of Health, National Observatory of New and Emerging Diseases, 1006, Tunis, Tunisia		2020-10-31	Ilhem Boutiba-Ben Boubaker et al
Tunisia/55153/2020	GH	47	20C	Tunisia	Tunisia	Ben Arous	Ben Arous	EPI_ISL_634977	Human	1-Laboratory of Microbiology, National Reference Lab, Charles Nicolle Hospital; 2-University of Tunis ElManar, Faculty of Medicine of Tunis, LR99ES09, Tunis, Tunisia	B.1	One month ago	Africa	Female	1-Clinical and Experimental Pharmacology Lab, LR16SP02, National Center of Pharmacovigilance, University of Tunis El Manar, Tunis, Tunisia. 2-Neurodegenerative diseases and psychiatric troubles, LR18SP03, Razi Hospital, University of Tunis El Manar, Tunis, Tunisia. 3- Ministry of Health, National Observatory of New and Emerging Diseases, 1006, Tunis, Tunisia		2020-10-31	Ilhem Boutiba-Ben Boubaker et al
Tunisia/55439/2020	GH	24	20A	Tunisia	Tunisia	Tunis	Tunis	EPI_ISL_635062	Human	1-Laboratory of Microbiology, National Reference Lab, Charles Nicolle Hospital; 2-University of Tunis ElManar, Faculty of Medicine of Tunis, LR99ES09, Tunis, Tunisia	B.1.160	One month ago	Africa	Female	1-Clinical and Experimental Pharmacology Lab, LR16SP02, National Center of Pharmacovigilance, University of Tunis El Manar, Tunis, Tunisia. 2-Neurodegenerative diseases and psychiatric troubles, LR18SP03, Razi Hospital, University of Tunis El Manar, Tunis, Tunisia. 3- Ministry of Health, National Observatory of New and Emerging Diseases, 1006, Tunis, Tunisia		2020-11-02	Ilhem Boutiba-Ben Boubaker et al
Tunisia/55308/2020	GH	58	20A	Tunisia	Tunisia	Tunis	Tunis	EPI_ISL_654019	Human	Laboratory of Microbiology, National Reference Lab, Charles Nicolle Hospital; 2-University of Tunis ElManar, Faculty of Medicine of Tunis, LR99ES09, Tunis, Tunisia	B.1.160	One week ago	Africa	Male	1-Clinical and Experimental Pharmacology Lab, LR16SP02, National Center of Pharmacovigilance, University of Tunis El Manar, Tunis, Tunisia. 2-Neurodegenerative diseases and psychiatric troubles, LR18SP03, Razi Hospital, University of Tunis El Manar, Tunis, Tunisia. 3- Ministry of Health, National Observatory of New and Emerging Diseases, 1006, Tunis, Tunisia		2020-11-02	Ilhem Boutiba-Ben Boubaker et al
Tunisia/55319/2020	GH	41	20A	Tunisia	Tunisia	Tunis	Tunis	EPI_ISL_635060	Human	1-Laboratory of Microbiology, National Reference Lab, Charles Nicolle Hospital; 2-University of Tunis ElManar, Faculty of Medicine of Tunis, LR99ES09, Tunis, Tunisia	B.1.160	One month ago	Africa	Male	1-Clinical and Experimental Pharmacology Lab, LR16SP02, National Center of Pharmacovigilance, University of Tunis El Manar, Tunis, Tunisia. 2-Neurodegenerative diseases and psychiatric troubles, LR18SP03, Razi Hospital, University of Tunis El Manar, Tunis, Tunisia. 3- Ministry of Health, National Observatory of New and Emerging Diseases, 1006, Tunis, Tunisia		2020-11-02	Ilhem Boutiba-Ben Boubaker et al
Tunisia/58412/2020	GH	23	20A	Tunisia	Tunisia	Ben Arous	Ben Arous	EPI_ISL_654018	Human	Laboratory of Microbiology, National Reference Lab, Charles Nicolle Hospital; 2-University of Tunis ElManar, Faculty of Medicine of Tunis, LR99ES09, Tunis, Tunisia	B.1.160	One week ago	Africa	Female	1-Clinical and Experimental Pharmacology Lab, LR16SP02, National Center of Pharmacovigilance, University of Tunis El Manar, Tunis, Tunisia. 2-Neurodegenerative diseases and psychiatric troubles, LR18SP03, Razi Hospital, University of Tunis El Manar, Tunis, Tunisia. 3- Ministry of Health, National Observatory of New and Emerging Diseases, 1006, Tunis, Tunisia		2020-11-02	Ilhem Boutiba-Ben Boubaker et al
SouthAfrica/KRISP-EC-K004570/2020	GH	22	20C	South Africa	South Africa	Eastern Cape	Eastern Cape	EPI_ISL_660608	Human	NHLS-IALCH	B.1	One week ago	Africa	Female	KRISP, KZN Research Innovation and Sequencing Platform		2020-11-11	Giandhari J et al A	Nelson Mandela Bay
SouthAfrica/KRISP-EC-K005340/2020	GH	21	20C	South Africa	South Africa	Eastern Cape	Eastern Cape	EPI_ISL_678574	Human	NHLS-IALCH	B.1	1-2 days ago	Africa	Female	KRISP, KZN Research Innovation and Sequencing Platform		2020-11-11	Giandhari J et al A	Sarah Baartman
SouthAfrica/KRISP-EC-K005351/2020	GH	59	20C	South Africa	South Africa	Eastern Cape	Eastern Cape	EPI_ISL_678634	Human	NHLS-IALCH	B.1	1-2 days ago	Africa	Female	KRISP, KZN Research Innovation and Sequencing Platform		2020-11-11	Giandhari J et al A	Nelson Mandela Bay
SouthAfrica/KRISP-EC-K005349/2020	GH	13	20C	South Africa	South Africa	Eastern Cape	Eastern Cape	EPI_ISL_678633	Human	NHLS-IALCH	B.1	1-2 days ago	Africa	Female	KRISP, KZN Research Innovation and Sequencing Platform		2020-11-11	Giandhari J et al A	Nelson Mandela Bay
SouthAfrica/KRISP-EC-K005339/2020	GH	25	20C	South Africa	South Africa	Eastern Cape	Eastern Cape	EPI_ISL_678625	Human	NHLS-IALCH	B.1	1-2 days ago	Africa	Female	KRISP, KZN Research Innovation and Sequencing Platform		2020-11-11	Giandhari J et al A	Sarah Baartman
SouthAfrica/KRISP-EC-K005355/2020	GH	55	20C	South Africa	South Africa	Eastern Cape	Eastern Cape	EPI_ISL_678636	Human	NHLS-IALCH	B.1	1-2 days ago	Africa	Female	KRISP, KZN Research Innovation and Sequencing Platform		2020-11-11	Giandhari J et al A	Sarah Baartman
SouthAfrica/KRISP-EC-K005352/2020	GH	26	20C	South Africa	South Africa	Eastern Cape	Eastern Cape	EPI_ISL_678575	Human	NHLS-IALCH	B.1	1-2 days ago	Africa	Male	KRISP, KZN Research Innovation and Sequencing Platform		2020-11-12	Giandhari J et al A	Nelson Mandela Bay
SouthAfrica/KRISP-EC-K004565/2020	GH	60	20C	South Africa	South Africa	Eastern Cape	Eastern Cape	EPI_ISL_660606	Human	NHLS-IALCH	B.1	One week ago	Africa	Male	KRISP, KZN Research Innovation and Sequencing Platform		2020-11-12	Giandhari J et al A	Nelson Mandela Bay
SouthAfrica/KRISP-EC-K004578/2020	GH	40	20C	South Africa	South Africa	Eastern Cape	Eastern Cape	EPI_ISL_660613	Human	NHLS-IALCH	B.1	One week ago	Africa	Male	KRISP, KZN Research Innovation and Sequencing Platform		2020-11-12	Giandhari J et al A	Nelson Mandela Bay
SouthAfrica/KRISP-EC-K005344/2020	GH	37	20C	South Africa	South Africa	Eastern Cape	Eastern Cape	EPI_ISL_678628	Human	NHLS-IALCH	B.1	1-2 days ago	Africa	Male	KRISP, KZN Research Innovation and Sequencing Platform		2020-11-12	Giandhari J et al A	Nelson Mandela Bay
SouthAfrica/KRISP-EC-K005350/2020	GH	68	20C	South Africa	South Africa	Eastern Cape	Eastern Cape	EPI_ISL_678566	Human	NHLS-IALCH	B.1	1-2 days ago	Africa	Female	KRISP, KZN Research Innovation and Sequencing Platform		2020-11-12	Giandhari J et al A	Sarah Baartman
SouthAfrica/KRISP-EC-K005360/2020	GH	15	20C	South Africa	South Africa	Eastern Cape	Eastern Cape	EPI_ISL_678641	Human	NHLS-IALCH	B.1	1-2 days ago	Africa	Female	KRISP, KZN Research Innovation and Sequencing Platform		2020-11-12	Giandhari J et al A	Sarah Baartman
SouthAfrica/KRISP-EC-K005347/2020	GH	21	20C	South Africa	South Africa	Eastern Cape	Eastern Cape	EPI_ISL_678631	Human	NHLS-IALCH	B.1	1-2 days ago	Africa	Female	KRISP, KZN Research Innovation and Sequencing Platform		2020-11-12	Giandhari J et al A	Nelson Mandela Bay
SouthAfrica/KRISP-EC-K005354/2020	GH	63	20C	South Africa	South Africa	Eastern Cape	Eastern Cape	EPI_ISL_678635	Human	NHLS-IALCH	B.1	1-2 days ago	Africa	Male	KRISP, KZN Research Innovation and Sequencing Platform		2020-11-13	Giandhari J et al A	Sarah Baartman
SouthAfrica/KRISP-EC-K004582/2020	GH	20	20C	South Africa	South Africa	Eastern Cape	Eastern Cape	EPI_ISL_660614	Human	NHLS-IALCH	B.1	One week ago	Africa	Female	KRISP, KZN Research Innovation and Sequencing Platform		2020-11-13	Giandhari J et al A	Sarah Baartman
SouthAfrica/KRISP-EC-K005333/2020	GH	6	20C	South Africa	South Africa	KwaZulu-Natal	KwaZulu-Natal	EPI_ISL_678621	Human	NHLS-IALCH	B.1	1-2 days ago	Africa	Female	KRISP, KZN Research Innovation and Sequencing Platform		2020-11-14	Giandhari J et al A	uMkhanyakude
SouthAfrica/KRISP-K005303-CS1/2020	GH	30	20C	South Africa	South Africa	KwaZulu-Natal	KwaZulu-Natal	EPI_ISL_678643	Human	NHLS-IALCH	B.1	1-2 days ago	Africa	Female	KRISP, KZN Research Innovation and Sequencing Platform		2020-11-15	Giandhari J et al A	eThekwini
SouthAfrica/KRISP-EC-K005254/2020	GH	44	20C	South Africa	South Africa	Eastern Cape	Eastern Cape	EPI_ISL_678564	Human	Netcare	B.1	1-2 days ago	Africa	Male	KRISP, KZN Research Innovation and Sequencing Platform		2020-11-17	Giandhari J et al A	Nelson Mandela Bay
SouthAfrica/KRISP-EC-K005330/2020	GH	21	20C	South Africa	South Africa	KwaZulu-Natal	KwaZulu-Natal	EPI_ISL_678618	Human	NHLS-IALCH	B.1	1-2 days ago	Africa	Female	KRISP, KZN Research Innovation and Sequencing Platform		2020-11-17	Giandhari J et al A	eThekwini
SouthAfrica/KRISP-EC-K005263/2020	GH	33	20C	South Africa	South Africa	Eastern Cape	Eastern Cape	EPI_ISL_678553	Human	Netcare	B.1	1-2 days ago	Africa	Female	KRISP, KZN Research Innovation and Sequencing Platform		2020-11-18	Giandhari J et al A	Nelson Mandela Bay
SouthAfrica/KRISP-EC-K005250/2020	GH	13	20C	South Africa	South Africa	Eastern Cape	Eastern Cape	EPI_ISL_678556	Human	Netcare	B.1	1-2 days ago	Africa	Female	KRISP, KZN Research Innovation and Sequencing Platform		2020-11-18	Giandhari J et al A	Nelson Mandela Bay
SouthAfrica/KRISP-EC-K005265/2020	GH	16	20C	South Africa	South Africa	Eastern Cape	Eastern Cape	EPI_ISL_678567	Human	Netcare	B.1	1-2 days ago	Africa	Female	KRISP, KZN Research Innovation and Sequencing Platform		2020-11-18	Giandhari J et al A	Nelson Mandela Bay
SouthAfrica/KRISP-EC-K005213/2020	GH	39	20C	South Africa	South Africa	Eastern Cape	Eastern Cape	EPI_ISL_678562	Human	Netcare	B.1	1-2 days ago	Africa	Female	KRISP, KZN Research Innovation and Sequencing Platform		2020-11-18	Giandhari J et al A	Nelson Mandela Bay
SouthAfrica/KRISP-EC-K005247/2020	GH	30	20C	South Africa	South Africa	Eastern Cape	Eastern Cape	EPI_ISL_678572	Human	Netcare	B.1	1-2 days ago	Africa	Male	KRISP, KZN Research Innovation and Sequencing Platform		2020-11-18	Giandhari J et al A	Nelson Mandela Bay
SouthAfrica/KRISP-EC-K005267/2020	GH	41	20C	South Africa	South Africa	Eastern Cape	Eastern Cape	EPI_ISL_678595	Human	Netcare	B.1	1-2 days ago	Africa	Female	KRISP, KZN Research Innovation and Sequencing Platform		2020-11-18	Giandhari J et al A	Nelson Mandela Bay
SouthAfrica/KRISP-EC-K005230/2020	GH	45	20C	South Africa	South Africa	Eastern Cape	Eastern Cape	EPI_ISL_678563	Human	Netcare	B.1	1-2 days ago	Africa	Female	KRISP, KZN Research Innovation and Sequencing Platform		2020-11-18	Giandhari J et al A	Nelson Mandela Bay
SouthAfrica/KRISP-EC-K005276/2020	GH	57	20C	South Africa	South Africa	Eastern Cape	Eastern Cape	EPI_ISL_678565	Human	Netcare	B.1	1-2 days ago	Africa	Male	KRISP, KZN Research Innovation and Sequencing Platform		2020-11-19	Giandhari J et al A	Nelson Mandela Bay
Israel/CVL-n4109/2030	GH		20C	Palestine	Palestine	West Bank	West Bank	EPI_ISL_649072	Human	Israel Central Virology laboratory	B.1	One month ago	Asia		Israel Central Virology laboratory		2020-03-11	Neta Zuckerman et al	Elkana
SaudiArabia/KAUST-MAKKAH1399/2020	GH		20A	Saudi Arabia	Saudi Arabia	Makkah	Makkah	EPI_ISL_678086	Human	Pathogen Genomics Lab King Abdullah University of Science and Technology(KAUST)	B.1.36	1-2 days ago	Asia		Pathogen Genomics Lab King Abdullah University of Science and Technology(KAUST)		2020-06-24	Muhammad Shuaib et al
Jordan/AM-ALSR-2586/2020	GH		20A	Jordan	Jordan	Amman	Amman	EPI_ISL_635782	Human	Biolab Diagnostic Laboratories	B.1.160	One month ago	Asia		Andersen lab at Scripps Research		2020-07-04	Issa Abu-Dayyeh et al
Bahrain/920319237_S17_L001/2020	GH		20A	Bahrain	Bahrain	Bahrain	Bahrain	EPI_ISL_632267	Human	Communicable Disease Laboratory, Public Health Directorate	B.1	One month ago	Asia		Communicable Disease Laboratory, Public Health Directorate		2020-07-26	AlWasti et al		MW228056.1
India/UT-58267-CSIR-IGIB/2020	GH	29	20A	India	India	Uttarakhand	Uttarakhand	EPI_ISL_636786	Human	National Centre for Disease control (NCDC)	B.1	One month ago	Asia	Female	NCDC/CSIR-IGIB		2020-08-03	Mahesh S. Dhar1* et al
India/DL-59608-CSIR-IGIB/2020	GH	35	20A	India	India	Delhi	Delhi	EPI_ISL_636802	Human	National Centre for Disease control (NCDC)	B.1.36	One month ago	Asia	Male	NCDC/CSIR-IGIB		2020-08-05	Mahesh S. Dhar1* et al
India/UT-63138-CSIR-IGIB/2020	GH	19	20A	India	India	Uttarakhand	Uttarakhand	EPI_ISL_636810	Human	National Centre for Disease control (NCDC)	B.1.36	One month ago	Asia	Female	NCDC/CSIR-IGIB		2020-08-05	Mahesh S. Dhar1* et al
India/UT-65187-CSIR-IGIB/2020	GH	25	20A	India	India	Uttarakhand	Uttarakhand	EPI_ISL_636797	Human	National Centre for Disease control (NCDC)	B.1.36	One month ago	Asia	Female	NCDC/CSIR-IGIB		2020-08-07	Mahesh S. Dhar1* et al
SaudiArabia/KAUST-RIYADH1250/2020	GH		20A	Saudi Arabia	Saudi Arabia	Riyadh	Riyadh	EPI_ISL_678216	Human	Pathogen Genomics Lab King Abdullah University of Science and Technology(KAUST)	B.1.160	1-2 days ago	Asia		Pathogen Genomics Lab King Abdullah University of Science and Technology(KAUST)		2020-08-11	Sara Mfarrej et al
SaudiArabia/KAUST-RIYADH1248/2020	GH		20A	Saudi Arabia	Saudi Arabia	Riyadh	Riyadh	EPI_ISL_678171	Human	Pathogen Genomics Lab King Abdullah University of Science and Technology(KAUST)	B.1.36	1-2 days ago	Asia		Pathogen Genomics Lab King Abdullah University of Science and Technology(KAUST)		2020-08-11	Sara Mfarrej et al
SaudiArabia/KAUST-RIYADH1233/2020	GH		20A	Saudi Arabia	Saudi Arabia	Riyadh	Riyadh	EPI_ISL_678247	Human	Pathogen Genomics Lab King Abdullah University of Science and Technology (KAUST)	B.1.36	1-2 days ago	Asia		Pathogen Genomics Lab King Abdullah University of Science and Technology (KAUST)		2020-08-11	Muhammad Shuaib et al
SaudiArabia/KAUST-RIYADH1241/2020	GH		20A	Saudi Arabia	Saudi Arabia	Riyadh	Riyadh	EPI_ISL_678213	Human	Pathogen Genomics Lab King Abdullah University of Science and Technology(KAUST)	B.1.36	1-2 days ago	Asia		Pathogen Genomics Lab King Abdullah University of Science and Technology(KAUST)		2020-08-11	Muhammad Shuaib et al
Indonesia/YO-UGM-10007/2020	GH	52	20A	Indonesia	Indonesia	Yogyakarta	Yogyakarta	EPI_ISL_632936	Human	Puskesmas Mlati 1 Sleman	B.1.36	One month ago	Asia	Female	Genetics Working Group (Pokja Genetik) Faculty of Medicine, Public Health and Nursing Universitas Gadjah Mada (FK-KMK UGM); Disease Investigation Center Wates Ministry of Agriculture Indonesia; Department of Microbiology FK-KMK UGM; Laboratorium Diagnostik Yayasan Tahija World Mosquito Program (WMP) Yogyakarta Center for Tropical Medicine FK-KMK UGM; Integrated Research Center FK-KMK UGM; Departm…		2020-08-22	Gunadi et al
Bahrain/340564387_S8_L001/2020	GH		20A	Bahrain	Bahrain	Bahrain	Bahrain	EPI_ISL_632263	Human	Communicable Disease Laboratory, Public Health Directorate	B.1	One month ago	Asia		Communicable Disease Laboratory, Public Health Directorate		2020-08-25	AlWasti et al		MW228052.1
Indonesia/YO-UGM-48651/2020	GH	41	20A	Indonesia	Indonesia	Yogyakarta	Yogyakarta	EPI_ISL_632937	Human	RSUD Saptosari Gunung Kidul	B.1.160	One month ago	Asia	Male	Genetics Working Group (Pokja Genetik) Faculty of Medicine, Public Health and Nursing Universitas Gadjah Mada (FK-KMK UGM); Disease Investigation Center Wates Ministry of Agriculture Indonesia; Department of Microbiology FK-KMK UGM; Laboratorium Diagnostik Yayasan Tahija World Mosquito Program (WMP) Yogyakarta Center for Tropical Medicine FK-KMK UGM; Integrated Research Center FK-KMK UGM; Departm…		2020-09-09	Gunadi et al
Yunnan/02/2020	GH		20A	China	China	Yunnan	Yunnan	EPI_ISL_632934	Human	Department of Acute Infectious Diseases Control and Prevention,Yunnan Provincial Center for Disease Control and Prevention	B.1.36	One month ago	Asia	Female	Department of Acute Infectious Diseases Control and Prevention,Yunnan Provincial Center for Disease Control and Prevention		2020-09-13	Meiling Zhang et al
Yunnan/03/2020	GH		20A	China	China	Yunnan	Yunnan	EPI_ISL_632935	Human	Department of Acute Infectious Diseases Control and Prevention, Yunnan Provincial Center for Disease Control and Prevention	B.1.36	One month ago	Asia	Female	Department of Acute Infectious Diseases Control and Prevention, Yunnan Provincial Center for Disease Control and Prevention		2020-09-13	Meiling Zhang et al
Taiwan/CGMH-CGU-36/2020	GH		20A	Taiwan	Taiwan	Taiwan	Taiwan	EPI_ISL_667809	Human	Laboratory Medicine	B.1.36	3-7 days ago	Asia	Male	Department of Laboratory Medicine, Lin-Kou Chang Gung Memorial Hospital, Taoyuan, Taiwan		2020-09-17	Kuo-Chien Tsao et al B	Taoyuan
India/TG-CCMB-OM29/2020	GH	46	20A	India	India	Telangana	Telangana	EPI_ISL_644723	Human	Osmania Medical College	B.1.36	One month ago	Asia	Male	CSIR-Centre for Cellular and Molecular Biology		2020-09-20	Dr.V.Sudha Rani et al	Hyderabad
Iran/9GS/2020	GH	29	20A	Iran	Iran	Iran	Iran	EPI_ISL_625683	Human	National Reference Laboratory for COVID-19, Pasteur Institute of Iran	B.1.36	One month ago	Asia	Male	National Reference Laboratory for COVID-19, Pasteur Institute of Iran		2020-09-20	Zahra Ahmadi et al
Bahrain/340809497_S11_L001/2020	GH		20A	Bahrain	Bahrain	Bahrain	Bahrain	EPI_ISL_632264	Human	Communicable Disease Laboratory, Public Health Directorate	A.1	One month ago	Asia		Communicable Disease Laboratory, Public Health Directorate		2020-10-04	AlWasti et al		MW228053.1
Taiwan/CGMH-CGU-33/2020	GH		20C	Taiwan	Taiwan	Taiwan	Taiwan	EPI_ISL_660545	Human	Laboratory Medicine	B.1.2	One week ago	Asia	Male	Department of Laboratory Medicine, Lin-Kou Chang Gung Memorial Hospital, Taoyuan, Taiwan		2020-10-04	Kuo-Chien Tsao et al B	Taoyuan
Bahrain/600023154_S29/2020	GH		20A	Bahrain	Bahrain	Bahrain	Bahrain	EPI_ISL_632258	Human	Communicable Disease Laboratory, Public Health Directorate	B.1	One month ago	Asia		Communicable Disease Laboratory, Public Health Directorate		2020-10-14	AlHujairi et al		MW237743.1
Bahrain/340861258/2020	GH		20A	Bahrain	Bahrain	Bahrain	Bahrain	EPI_ISL_632260	Human	Communicable Disease Laboratory, Public Health Directorate	B.1	One month ago	Asia		Communicable Disease Laboratory, Public Health Directorate		2020-10-14	AlTaif et al		MW237768.1
Bahrain/340862192_S34_L001/2020	GH		20A	Bahrain	Bahrain	Bahrain	Bahrain	EPI_ISL_632907	Human	Communicable Disease Laboratory, Public Health Directorate	A.1	One month ago	Asia		Communicable Disease Laboratory, Public Health Directorate		2020-10-14	AlAbbas et al		MW242710.1
Bahrain/340859154_S6/2020	GH		20A	Bahrain	Bahrain	Bahrain	Bahrain	EPI_ISL_632270	Human	Communicable Disease Laboratory, Public Health Directorate	A.1	One month ago	Asia		Communicable Disease Laboratory, Public Health Directorate		2020-10-14	AlWasti et al		MW228265.1
Bahrain/340860476/2020	GH		20A	Bahrain	Bahrain	Bahrain	Bahrain	EPI_ISL_632251	Human	Communicable Disease Laboratory, Public Health Directorate	B.1	One month ago	Asia		Communicable Disease Laboratory, Public Health Directorate		2020-10-14	AlWasti et al		MW237715.1
Bahrain/340859842_S14/2020	GH		20A	Bahrain	Bahrain	Bahrain	Bahrain	EPI_ISL_632275	Human	Communicable Disease Laboratory, Public Health Directorate	B.1	One month ago	Asia		Communicable Disease Laboratory, Public Health Directorate		2020-10-14	AlWasti et al		MW228270.1
Bahrain/340860526_S17/2020	GH		20A	Bahrain	Bahrain	Bahrain	Bahrain	EPI_ISL_632282	Human	Communicable Disease Laboratory, Public Health Directorate	B.1	One month ago	Asia		Communicable Disease Laboratory, Public Health Directorate		2020-10-14	AlWasti et al		MW228277.1
India/WB-IICB-032/2020	GH		20A	India	India	West Bengal	West Bengal	EPI_ISL_661305	Human	CSIR-Indian Institute of Chemical Biology, MEDICA Supercpecialty Hospital Kolkata	B.1.36	One week ago	Asia		CSIR-Indian Institute of Chemical Biology, MEDICA Supercpecialty Hospital Kolkata		2020-10-29	Sujay Krishna Maity et al
India/WB-IICB-035/2020	GH		20A	India	India	West Bengal	West Bengal	EPI_ISL_661308	Human	CSIR-Indian Institute of Chemical Biology, MEDICA Supercpecialty Hospital Kolkata	B.1.36	One week ago	Asia		CSIR-Indian Institute of Chemical Biology, MEDICA Supercpecialty Hospital Kolkata		2020-10-29	Sujay Krishna Maity et al
India/WB-IICB-038/2020	GH		20A	India	India	West Bengal	West Bengal	EPI_ISL_661311	Human	CSIR-Indian Institute of Chemical Biology, MEDICA Supercpecialty Hospital Kolkata	B.1.36	One week ago	Asia		CSIR-Indian Institute of Chemical Biology, MEDICA Supercpecialty Hospital Kolkata		2020-10-29	Sujay Krishna Maity et al
Singapore/1128/2020	GH	31	20A	Singapore	Singapore	Singapore	Singapore	EPI_ISL_626640	Human	National Public Health Laboratory, National Centre for Infectious Diseases	B.1.36	One month ago	Asia	Female	National Public Health Laboratory, National Centre for Infectious Diseases		2020-10-29	Tze Minn Mak et al
Singapore/1130/2020	GH	40	20A	Singapore	Singapore	Singapore	Singapore	EPI_ISL_626642	Human	National Public Health Laboratory, National Centre for Infectious Diseases	B.1.163	One month ago	Asia	Female	National Public Health Laboratory, National Centre for Infectious Diseases		2020-10-30	Tze Minn Mak et al
Singapore/1133/2020	GH	28	20A	Singapore	Singapore	Singapore	Singapore	EPI_ISL_626646	Human	National Public Health Laboratory, National Centre for Infectious Diseases	B.1.160	One month ago	Asia	Male	National Public Health Laboratory, National Centre for Infectious Diseases		2020-11-02	Tze Minn Mak et al
SriLanka/cov3563/2020	GH	43	20C	Sri Lanka	Sri Lanka	Colombo	Colombo	EPI_ISL_668454	Human	Centre for Dengue Research, Department of Immunology and Molecular Medicine	B.1	3-7 days ago	Asia	Male	Centre for Dengue Research, Department of Immunology and Molecular Medicine		2020-11-02	Chandima Jeewandara et al A
SriLanka/C28338/2020	GH	34	20C	Sri Lanka	Sri Lanka	Colombo	Colombo	EPI_ISL_668450	Human	Centre for Dengue Research, Department of Immunology and Molecular Medicine	B.1	3-7 days ago	Asia	Male	Centre for Dengue Research, Department of Immunology and Molecular Medicine		2020-11-04	Chandima Jeewandara et al A
SriLanka/C28324/2020	GH	46	20C	Sri Lanka	Sri Lanka	Colombo	Colombo	EPI_ISL_668449	Human	Centre for Dengue Research, Department of Immunology and Molecular Medicine	B.1	3-7 days ago	Asia	Male	Centre for Dengue Research, Department of Immunology and Molecular Medicine		2020-11-04	Chandima Jeewandara et al A
Singapore/1404/2020	GH	28	20A	Singapore	Singapore	Singapore	Singapore	EPI_ISL_645131	Human	National Public Health Laboratory, National Centre for Infectious Diseases	B.1.36.1	One month ago	Asia	Male	National Public Health Laboratory, National Centre for Infectious Diseases		2020-11-07	Tze Minn Mak et al
Singapore/1401/2020	GH	59	20A	Singapore	Singapore	Singapore	Singapore	EPI_ISL_645128	Human	National Public Health Laboratory, National Centre for Infectious Diseases	B.1.36.1	One month ago	Asia	Female	National Public Health Laboratory, National Centre for Infectious Diseases		2020-11-07	Tze Minn Mak et al
Singapore/1397/2020	GH	69	20A	Singapore	Singapore	Singapore	Singapore	EPI_ISL_645124	Human	National Public Health Laboratory, National Centre for Infectious Diseases	B.1.36.1	One month ago	Asia	Female	National Public Health Laboratory, National Centre for Infectious Diseases		2020-11-07	Tze Minn Mak et al
Singapore/1394/2020	GH	55	20A	Singapore	Singapore	Singapore	Singapore	EPI_ISL_645121	Human	National Public Health Laboratory, National Centre for Infectious Diseases	B.1.36.1	One month ago	Asia	Female	National Public Health Laboratory, National Centre for Infectious Diseases		2020-11-07	Tze Minn Mak et al
Singapore/1402/2020	GH	49	20A	Singapore	Singapore	Singapore	Singapore	EPI_ISL_645129	Human	National Public Health Laboratory, National Centre for Infectious Diseases	B.1.36	One month ago	Asia	Male	National Public Health Laboratory, National Centre for Infectious Diseases		2020-11-08	Tze Minn Mak et al
Singapore/1403/2020	GH	37	20A	Singapore	Singapore	Singapore	Singapore	EPI_ISL_645130	Human	National Public Health Laboratory, National Centre for Infectious Diseases	B.1.36.1	One month ago	Asia	Female	National Public Health Laboratory, National Centre for Infectious Diseases		2020-11-09	Tze Minn Mak et al
Singapore/1400/2020	GH	64	20A	Singapore	Singapore	Singapore	Singapore	EPI_ISL_645127	Human	National Public Health Laboratory, National Centre for Infectious Diseases	B.1.36.1	One month ago	Asia	Male	National Public Health Laboratory, National Centre for Infectious Diseases		2020-11-09	Tze Minn Mak et al
Singapore/1399/2020	GH	46	20A	Singapore	Singapore	Singapore	Singapore	EPI_ISL_645126	Human	National Public Health Laboratory, National Centre for Infectious Diseases	B.1.36.1	One month ago	Asia	Male	National Public Health Laboratory, National Centre for Infectious Diseases		2020-11-09	Tze Minn Mak et al
Singapore/1396/2020	GH	30	20A	Singapore	Singapore	Singapore	Singapore	EPI_ISL_645123	Human	National Public Health Laboratory, National Centre for Infectious Diseases	B.1.36.1	One month ago	Asia	Male	National Public Health Laboratory, National Centre for Infectious Diseases		2020-11-09	Tze Minn Mak et al
Singapore/1393/2020	GH	44	20A	Singapore	Singapore	Singapore	Singapore	EPI_ISL_645120	Human	National Public Health Laboratory, National Centre for Infectious Diseases	B.1.36.1	One month ago	Asia	Male	National Public Health Laboratory, National Centre for Infectious Diseases		2020-11-09	Tze Minn Mak et al
Singapore/1415/2020	GH	25	20A	Singapore	Singapore	Singapore	Singapore	EPI_ISL_654813	Human	National Public Health Laboratory, National Centre for Infectious Diseases	B.1	One week ago	Asia	Female	National Public Health Laboratory, National Centre for Infectious Diseases		2020-11-11	Tze Minn Mak et al
Singapore/1418/2020	GH	31	20A	Singapore	Singapore	Singapore	Singapore	EPI_ISL_654817	Human	National Public Health Laboratory, National Centre for Infectious Diseases	B.1	One week ago	Asia	Female	National Public Health Laboratory, National Centre for Infectious Diseases		2020-11-11	Tze Minn Mak et al
Singapore/1395/2020	GH	62	20A	Singapore	Singapore	Singapore	Singapore	EPI_ISL_645122	Human	National Public Health Laboratory, National Centre for Infectious Diseases	B.1.36.1	One month ago	Asia	Male	National Public Health Laboratory, National Centre for Infectious Diseases		2020-11-11	Tze Minn Mak et al
Singapore/1417/2020	GH	23	20A	Singapore	Singapore	Singapore	Singapore	EPI_ISL_654815	Human	National Public Health Laboratory, National Centre for Infectious Diseases	B.1.36.1	One week ago	Asia	Female	National Public Health Laboratory, National Centre for Infectious Diseases		2020-11-11	Tze Minn Mak et al
Singapore/1413/2020	GH	60	20A	Singapore	Singapore	Singapore	Singapore	EPI_ISL_654811	Human	National Public Health Laboratory, National Centre for Infectious Diseases	B.1.36.1	One week ago	Asia	Male	National Public Health Laboratory, National Centre for Infectious Diseases		2020-11-11	Tze Minn Mak et al
Singapore/1416/2020	GH	35	20A	Singapore	Singapore	Singapore	Singapore	EPI_ISL_654814	Human	National Public Health Laboratory, National Centre for Infectious Diseases	B.1.36	One week ago	Asia	Female	National Public Health Laboratory, National Centre for Infectious Diseases		2020-11-11	Tze Minn Mak et al
Singapore/1414/2020	GH	52	20A	Singapore	Singapore	Singapore	Singapore	EPI_ISL_654812	Human	National Public Health Laboratory, National Centre for Infectious Diseases	B.1.36	One week ago	Asia	Female	National Public Health Laboratory, National Centre for Infectious Diseases		2020-11-12	Tze Minn Mak et al
Bahrain/341063655_S20_L001/2020	GH		20A	Bahrain	Bahrain	Bahrain	Bahrain	EPI_ISL_678270	Human	Communicable Disease Laboratory, Public Health Directorate	B.1.39	1-2 days ago	Asia		Communicable Disease Laboratory, Public Health Directorate		2020-11-12	Alwasti et al
Bahrain/341063114_S18_L001/2020	GH		20A	Bahrain	Bahrain	Bahrain	Bahrain	EPI_ISL_678269	Human	Communicable Disease Laboratory, Public Health Directorate	B.1	1-2 days ago	Asia		Communicable Disease Laboratory, Public Health Directorate		2020-11-12	Alwasti et al
Singapore/1414_2/2020	GH	52	20A	Singapore	Singapore	Singapore	Singapore	EPI_ISL_654816	Human	National Public Health Laboratory, National Centre for Infectious Diseases	B.1.36	One week ago	Asia	Female	National Public Health Laboratory, National Centre for Infectious Diseases		2020-11-13	Tze Minn Mak et al
Bahrain/600041988_S21_L001/2020	GH		20A	Bahrain	Bahrain	Bahrain	Bahrain	EPI_ISL_678261	Human	Communicable Disease Laboratory, Public Health Directorate	B.1.36	1-2 days ago	Asia		Communicable Disease Laboratory, Public Health Directorate		2020-11-22	Alwasti et al
Slovenia/10986/2020	GH	75	20A	Slovenia	Slovenia	Slovenia	Slovenia	EPI_ISL_635255	Human	Institute of Microbiology and Immunology, Faculty of Medicine, University of Ljubljana	B.1	One month ago	Europe	Male	Institute of Microbiology and Immunology, Faculty of Medicine, University of Ljubljana		2020-03-21	Toma≈æ Mark Zorec et al
Serbia/Pancevo-007910104/2020	GH		20A	Serbia	Serbia	South Banat District	South Banat District	EPI_ISL_676576	Human	Scientific Veterinary Institute Novi Sad	B.1.160	3-7 days ago	Europe		Veterinary Specialized Institute "Kraljevo", Serbia		2020-03-31	Vidanovic et al	Pancevo
CzechRepublic/NRL_9640/2020	GH	45	20C	Czech Republic	Czech Republic	Moravian-Silesian Region	Moravian-Silesian Region	EPI_ISL_626593	Human	The National Institute of Public Health	B.1	One month ago	Europe	Female	State Veterinary Institute Prague		2020-04-04	Nagy et al	Fr√Ωdek-M√≠stek
Slovenia/V0-6779/2020	GH	46	20A	Slovenia	Slovenia	Slovenia	Slovenia	EPI_ISL_635296	Human	Institute of Microbiology and Immunology, Faculty of Medicine, University of Ljubljana	B.1	One month ago	Europe	Male	Institute of Microbiology and Immunology, Faculty of Medicine, University of Ljubljana		2020-04-08	Toma≈æ Mark Zorec et al
Serbia/Pancevo-037181504/2020	GH		20C	Serbia	Serbia	South Banat District	South Banat District	EPI_ISL_676594	Human	Scientific Veterinary Institute Novi Sad	B.1.3	3-7 days ago	Europe		Veterinary Specialized Institute "Kraljevo", Serbia		2020-04-14	Vidanovic et al	Pancevo
Slovenia/V0-24263/2020	GH	36	20A	Slovenia	Slovenia	Slovenia	Slovenia	EPI_ISL_635279	Human	Institute of Microbiology and Immunology, Faculty of Medicine, University of Ljubljana	B.1	One month ago	Europe	Female	Institute of Microbiology and Immunology, Faculty of Medicine, University of Ljubljana		2020-05-10	Toma≈æ Mark Zorec et al
Norway/CS-10/2020	GH		20A	Norway	Norway	Viken	Viken	EPI_ISL_665259	Human	Dept. of Microbiology and Infection Control, Akershus University Hospital HF	B.1	One week ago	Europe		Dept. of Microbiology and Infection Control, Akershus University Hospital HF		2020-05-12	Hege Vangstein Aamot et al
France/PAC-SC458/2020	GH	51	20A	France	France	Provence-Alpes-C√¥te d'Azur	Provence-Alpes-C√¥te d'Azur	EPI_ISL_649188	Human	Unit√© des Virus √âmergents	B.1	One month ago	Europe	Male	CNR Virus des Infections Respiratoires - France SUD		2020-05-14	Antonin Bal et al	Marseille
Ireland/LK-NVRL-MPH95956/2020	GH		20C	Ireland	Ireland	Limerick	Limerick	EPI_ISL_671353	Human	National Virus Reference Laboratory	B.1.3	3-7 days ago	Europe	Male	Irish Coronavirus Sequencing Consortium - Teagasc Moorepark		2020-05-15	Calm Walsh et al
Germany/NW-UBI-24/2020	GH	42	20C	Germany	Germany	North Rhine Westphalia	North Rhine Westphalia	EPI_ISL_631278	Human	MVZ DIAMEDIS Diagnostische Medizin Sennestadt GmbH	B.1	One month ago	Europe	Female	Bielefeld University		2020-06-19	David Brandt et al	Bielefeld
Sweden/20-52770/2020	GH	58	20C	Sweden	Sweden	Kronoberg	Kronoberg	EPI_ISL_654948	Human	Klinisk mikrobiologi	B.1	One week ago	Europe	Female	The Public Health Agency of Sweden		2020-08-03	Anna-Malin Linde et al
Sweden/20-22131/2020	GH	62	20C	Sweden	Sweden	Orebro	Orebro	EPI_ISL_676513	Human	Orebro klinisk mikrobiologi	B.1	3-7 days ago	Europe	Female	The Public Health Agency of Sweden		2020-08-25	Department of Microbiology et al
Hungary/UD-56297/2020	GH	23	20A	Hungary	Hungary	Hajd√∫-Bihar County	Hajd√∫-Bihar County	EPI_ISL_671425	Human	University of Debrecen, Department of Medical Microbiology	B.1.160	3-7 days ago	Europe	Female	National Laboratory of Virology, Szent√°gothai Research Centre		2020-08-31	Endre G√°bor T√≥th et al
Hungary/UD-56251/2020	GH	19	20A	Hungary	Hungary	Hajd√∫-Bihar County	Hajd√∫-Bihar County	EPI_ISL_671421	Human	University of Debrecen, Department of Medical Microbiology	B.1.160	3-7 days ago	Europe	Male	National Laboratory of Virology, Szent√°gothai Research Centre		2020-08-31	Endre G√°bor T√≥th et al
Norway/3787/2020	GH		20A	Norway	Norway	Viken	Viken	EPI_ISL_668440	Human	Ostfold Hospital Trust - Kalnes, Centre for Laboratory Medicine, Section for gene technology and infection serology	B.1.160	3-7 days ago	Europe		Norwegian Institute of Public Health, Department of Virology		2020-09-02	Kathrine Stene-Johansen et al
Hungary/UD-58004/2020	GH	18	20A	Hungary	Hungary	Borsod-Aba√∫j-Zempl√©n County	Borsod-Aba√∫j-Zempl√©n County	EPI_ISL_671447	Human	University of Debrecen, Department of Medical Microbiology	B.1.160	3-7 days ago	Europe	Male	National Laboratory of Virology, Szent√°gothai Research Centre		2020-09-02	Endre G√°bor T√≥th et al
Hungary/UD-57885/2020	GH	18	20A	Hungary	Hungary	Szabolcs-Szatm√°r-Bereg County	Szabolcs-Szatm√°r-Bereg County	EPI_ISL_671435	Human	University of Debrecen, Department of Medical Microbiology	B.1	3-7 days ago	Europe	Male	National Laboratory of Virology, Szent√°gothai Research Centre		2020-09-02	Endre G√°bor T√≥th et al
Hungary/UD-58011/2020	GH	52	20A	Hungary	Hungary	Borsod-Aba√∫j-Zempl√©n County	Borsod-Aba√∫j-Zempl√©n County	EPI_ISL_671448	Human	University of Debrecen, Department of Medical Microbiology	B.1.160	3-7 days ago	Europe	Male	National Laboratory of Virology, Szent√°gothai Research Centre		2020-09-02	Endre G√°bor T√≥th et al
Hungary/UD-57985/2020	GH	24	20A	Hungary	Hungary	Borsod-Aba√∫j-Zempl√©n County	Borsod-Aba√∫j-Zempl√©n County	EPI_ISL_671445	Human	University of Debrecen, Department of Medical Microbiology	B.1.160	3-7 days ago	Europe	Male	National Laboratory of Virology, Szent√°gothai Research Centre		2020-09-02	Endre G√°bor T√≥th et al
Hungary/US-33714w/2020	GH	52	20A	Hungary	Hungary	Csongr√°d County	Csongr√°d County	EPI_ISL_677763	Human	University of Szeged, Institute of Clinical Microbiology	B.1.160	1-2 days ago	Europe	Male	National Laboratory of Virology, Szent√°gothai Research Centre		2020-09-02	Endre G√°bor T√≥th et al
Hungary/UD-57889/2020	GH	65	20A	Hungary	Hungary	Hajd√∫-Bihar County	Hajd√∫-Bihar County	EPI_ISL_671436	Human	University of Debrecen, Department of Medical Microbiology	B.1.160	3-7 days ago	Europe	Male	National Laboratory of Virology, Szent√°gothai Research Centre		2020-09-02	Endre G√°bor T√≥th et al
Netherlands/ZH-EMC-741/2020	GH		20A	Netherlands	Netherlands	South Holland	South Holland	EPI_ISL_632377	Human	Dutch COVID-19 response team	B.1.160	One month ago	Europe		Erasmus Medical Center		2020-09-07	Bas Oude Munnink et al
Ireland/LH-NVRL-73IRL70373/2020	GH		20C	Ireland	Ireland	Louth	Louth	EPI_ISL_639825	Human	National Virus Reference Laboratory	B.1	One month ago	Europe	Female	National Virus Reference Laboratory		2020-09-14	Michael Carr et al
France/PAC-MEPHI-1669/2020	GH		20A	France	France	Provence-Alpes-C√¥te d'Azur	Provence-Alpes-C√¥te d'Azur	EPI_ISL_644414	Human	MEPHI, Aix Marseille University	B.1.160	One month ago	Europe		MEPHI, Aix Marseille University		2020-09-15	Anthony LEVASSEUR et al	Marseille
Germany/NW-HHU-254/2020	GH		20A	Germany	Germany	North Rhine Westphalia	North Rhine Westphalia	EPI_ISL_631387	Human	ZOTZ KLIMAS MVZ D√ºsseldorf-Centrum GbR √úBAG f√ºr Labormedizin, Genetik, Zytologie, Pathologie	B.1.9	One month ago	Europe		Center of Medical Microbiology, Virology, and Hospital Hygiene, University of Duesseldorf		2020-09-16	Maximilian Damagnez et al	Duesseldorf
France/PAC-MEPHI-1733/2020	GH		20A	France	France	Provence-Alpes-C√¥te d'Azur	Provence-Alpes-C√¥te d'Azur	EPI_ISL_644436	Human	MEPHI, Aix Marseille University	B.1.160	One month ago	Europe		MEPHI, Aix Marseille University		2020-09-16	Anthony LEVASSEUR et al	Marseille
Belgium/ULG-10744/2020	GH	47	20A	Belgium	Belgium	Li√®ge	Li√®ge	EPI_ISL_641586	Human	Department of Clinical Microbiology	B.1.160	One month ago	Europe	Female	GIGA Medical Genomics		2020-09-19	Keith Durkin et al
France/PAC-MEPHI-1770/2020	GH		20A	France	France	Provence-Alpes-C√¥te d'Azur	Provence-Alpes-C√¥te d'Azur	EPI_ISL_644398	Human	MEPHI, Aix Marseille University	B.1.160	One month ago	Europe		MEPHI, Aix Marseille University		2020-09-19	Anthony LEVASSEUR et al	Marseille
France/PAC-MEPHI-2132/2020	GH		20C	France	France	Provence-Alpes-C√¥te d'Azur	Provence-Alpes-C√¥te d'Azur	EPI_ISL_644505	Human	MEPHI, Aix Marseille University	B.1	One month ago	Europe		MEPHI, Aix Marseille University		2020-09-25	Anthony LEVASSEUR et al	Marseille
Norway/3911/2020	GH		20C	Norway	Norway	Vestfold Og Telemark	Vestfold Og Telemark	EPI_ISL_668390	Human	Vestfold Hospital, Toensberg Department of Microbiology	B.1	3-7 days ago	Europe		Norwegian Institute of Public Health, Department of Virology		2020-09-28	Kathrine Stene-Johansen et al
Norway/3784/2020	GH		20A	Norway	Norway	Viken	Viken	EPI_ISL_668439	Human	Ostfold Hospital Trust - Kalnes, Centre for Laboratory Medicine, Section for gene technology and infection serology	B.1.160	3-7 days ago	Europe		Norwegian Institute of Public Health, Department of Virology		2020-09-29	Kathrine Stene-Johansen et al
Hungary/US-57479w/2020	GH	43	20A	Hungary	Hungary	Csongr√°d County	Csongr√°d County	EPI_ISL_677782	Human	University of Szeged, Institute of Clinical Microbiology	B.1.160	1-2 days ago	Europe	Female	National Laboratory of Virology, Szent√°gothai Research Centre		2020-10-01	Endre G√°bor T√≥th et al
Netherlands/ZH-EMC-672/2020	GH		20A	Netherlands	Netherlands	South Holland	South Holland	EPI_ISL_632368	Human	Dutch COVID-19 response team	B.1.160	One month ago	Europe		Erasmus Medical Center		2020-10-02	Bas Oude Munnink et al
Hungary/UD-90491/2020	GH	65	20A	Hungary	Hungary	Borsod-Aba√∫j-Zempl√©n County	Borsod-Aba√∫j-Zempl√©n County	EPI_ISL_671472	Human	University of Debrecen, Department of Medical Microbiology	B.1.160	3-7 days ago	Europe	Male	National Laboratory of Virology, Szent√°gothai Research Centre		2020-10-04	Endre G√°bor T√≥th et al
Hungary/UD-90455/2020	GH	62	20A	Hungary	Hungary	Borsod-Aba√∫j-Zempl√©n County	Borsod-Aba√∫j-Zempl√©n County	EPI_ISL_671469	Human	University of Debrecen, Department of Medical Microbiology	B.1.160	3-7 days ago	Europe	Female	National Laboratory of Virology, Szent√°gothai Research Centre		2020-10-04	Endre G√°bor T√≥th et al
Hungary/UD-91823/2020	GH	80	20A	Hungary	Hungary	Hajd√∫-Bihar County	Hajd√∫-Bihar County	EPI_ISL_671484	Human	University of Debrecen, Department of Medical Microbiology	B.1.160	3-7 days ago	Europe	Female	National Laboratory of Virology, Szent√°gothai Research Centre		2020-10-06	Endre G√°bor T√≥th et al
France/PAC-MEPHI-2341/2020	GH		20A	France	France	Provence-Alpes-C√¥te d'Azur	Provence-Alpes-C√¥te d'Azur	EPI_ISL_644541	Human	MEPHI, Aix Marseille University	B.1.160	One month ago	Europe		MEPHI, Aix Marseille University		2020-10-08	Anthony LEVASSEUR et al	Marseille
Hungary/UD-94357/2020	GH	46	20A	Hungary	Hungary	Borsod-Aba√∫j-Zempl√©n County	Borsod-Aba√∫j-Zempl√©n County	EPI_ISL_678393	Human	University of Debrecen, Department of Medical Microbiology	B.1.160	1-2 days ago	Europe	Male	National Laboratory of Virology, Szent√°gothai Research Centre		2020-10-08	Endre G√°bor T√≥th et al
France/PAC-MEPHI-2382/2020	GH		20A	France	France	Provence-Alpes-C√¥te d'Azur	Provence-Alpes-C√¥te d'Azur	EPI_ISL_644549	Human	MEPHI, Aix Marseille University	B.1.160	One month ago	Europe		MEPHI, Aix Marseille University		2020-10-11	Anthony LEVASSEUR et al	Marseille
France/PAC-MEPHI-2400/2020	GH		20A	France	France	Provence-Alpes-C√¥te d'Azur	Provence-Alpes-C√¥te d'Azur	EPI_ISL_644556	Human	MEPHI, Aix Marseille University	B.1.160	One month ago	Europe		MEPHI, Aix Marseille University		2020-10-13	Anthony LEVASSEUR et al	Marseille
France/PAC-MEPHI-2410/2020	GH		20A	France	France	Provence-Alpes-C√¥te d'Azur	Provence-Alpes-C√¥te d'Azur	EPI_ISL_644559	Human	MEPHI, Aix Marseille University	B.1.160	One month ago	Europe		MEPHI, Aix Marseille University		2020-10-13	Anthony LEVASSEUR et al	Marseille
France/OCC-NRC02765/2020	GH	36	20C	France	France	Occitanie	Occitanie	EPI_ISL_640002	Human	CNR Virus des Infections Respiratoires - France SUD	B.1	One month ago	Europe	Female	CNR Virus des Infections Respiratoires - France SUD		2020-10-19	Antonin Bal et al	Montpellier
France/OCC-117/2020	GH	92	20A	France	France	Occitanie	Occitanie	EPI_ISL_671962	Human	CHU Purpan - Laboratoire de Virologie - Institut F√©d√©ratif de Biologie	B.1.160	3-7 days ago	Europe	Female	CHU Purpan - Laboratoire de Virologie - Institut F√©d√©ratif de Biologie		2020-10-22	Latour J. et al
Belgium/ULG-10835/2020	GH		20A	Belgium	Belgium	Li√®ge	Li√®ge	EPI_ISL_666871	Human	Department of Clinical Microbiology	B.1.160	3-7 days ago	Europe		GIGA Medical Genomics		2020-10-23	Keith Durkin et al
Belgium/ULG-10656/2020	GH	34	20A	Belgium	Belgium	Li√®ge	Li√®ge	EPI_ISL_636633	Human	Department of Clinical Microbiology	B.1.160	One month ago	Europe	Female	GIGA Medical Genomics		2020-10-26	Keith Durkin et al
Norway/4966/2020	GH		20A	Norway	Norway	Vestlandet	Vestlandet	EPI_ISL_635082	Human	Haukeland University Hospital, Department of Medical Microbiology	B.1.36	One month ago	Europe		Norwegian Institute of Public Health, Department of Virology		2020-10-26	Kathrine Stene-Johansen et al
Norway/4814/2020	GH		20A	Norway	Norway	Oslo	Oslo	EPI_ISL_635074	Human	Norwegian Institute of Public Health, Department of Virology	B.1	One month ago	Europe		Norwegian Institute of Public Health, Department of Virology		2020-10-26	Kathrine Stene-Johansen et al
Norway/5057/2020	GH		20A	Norway	Norway	Oslo	Oslo	EPI_ISL_635086	Human	Furst Medical Laboratory	B.1	One month ago	Europe		Norwegian Institute of Public Health, Department of Virology		2020-10-29	Kathrine Stene-Johansen et al
Sweden/20-53294/2020	GH	56	20A	Sweden	Sweden	Sormland	Sormland	EPI_ISL_661297	Human	Unilabs	B.1.160	One week ago	Europe	Female	The Public Health Agency of Sweden		2020-10-30	Department of Microbiology et al
Belgium/ULG-10771/2020	GH	50	20A	Belgium	Belgium	Li√®ge	Li√®ge	EPI_ISL_644617	Human	Department of Clinical Microbiology	B.1.160	One month ago	Europe	Female	GIGA Medical Genomics		2020-10-31	Keith Durkin et al
Denmark/DCGC-11020/2020	GH		20A	Denmark	Denmark	Hovedstaden	Hovedstaden	EPI_ISL_669829	Human	Department of Virus and Microbiological Special Diagnostics, Statens Serum Institut, Copenhagen, Denmark	B.1.160	3-7 days ago	Europe		Albertsen Lab, Department of Chemistry and Bioscience, Aalborg University, Denmark		2020-11-02	Danish Covid-19 Genome Consortium et al
France/ARA-NRC2813/2020	GH	41	20A	France	France	Auvergne-Rh√¥ne-Alpes	Auvergne-Rh√¥ne-Alpes	EPI_ISL_639983	Human	CNR Virus des Infections Respiratoires - France SUD	B.1.160	One month ago	Europe	Female	CNR Virus des Infections Respiratoires - France SUD		2020-11-02	Antonin Bal et al	Andrezieux-Boutheon
Denmark/DCGC-11084/2020	GH		20A	Denmark	Denmark	Hovedstaden	Hovedstaden	EPI_ISL_669574	Human	Department of Virus and Microbiological Special Diagnostics, Statens Serum Institut, Copenhagen, Denmark	B.1.160	3-7 days ago	Europe		Albertsen Lab, Department of Chemistry and Bioscience, Aalborg University, Denmark		2020-11-02	Danish Covid-19 Genome Consortium et al
Italy/APU-IZSPB_313PT/2020	GH	36	20A	Italy	Italy	Apulia	Apulia	EPI_ISL_653807	Human	I.R.C.C.S. "S. De Bellis" - Ente Ospedaliero	B.1.160	One month ago	Europe	Male	Istituto Zooprofilattico Sperimentale della Puglia e della Basilicata		2020-11-02	Parisi A. et al	Brindisi
Italy/APU-IZSPB_271PT/2020	GH	47	20A	Italy	Italy	Apulia	Apulia	EPI_ISL_653766	Human	I.R.C.C.S. "S. De Bellis" - Ente Ospedaliero	B.1.160	One month ago	Europe	Male	Istituto Zooprofilattico Sperimentale della Puglia e della Basilicata		2020-11-02	Parisi A. et al	Brindisi
Denmark/DCGC-10474/2020	GH		20A	Denmark	Denmark	Syddanmark	Syddanmark	EPI_ISL_669736	Human	Department of Virus and Microbiological Special Diagnostics, Statens Serum Institut, Copenhagen, Denmark	B.1.36	3-7 days ago	Europe		Albertsen Lab, Department of Chemistry and Bioscience, Aalborg University, Denmark		2020-11-02	Danish Covid-19 Genome Consortium et al
France/CVL-IPP9554/2020	GH	45	20C	France	France	Centre-Val de Loire	Centre-Val de Loire	EPI_ISL_660324	Human	General practitioner	B.1.3	One week ago	Europe	Female	National Reference Center for Viruses of Respiratory Infections, Institut Pasteur, Paris		2020-11-02	Marion Barbet et al B	Rouziers-de-Touraine
Italy/APU-IZSPB_299PT/2020	GH	26	20A	Italy	Italy	Apulia	Apulia	EPI_ISL_653793	Human	I.R.C.C.S. "S. De Bellis" - Ente Ospedaliero	B.1.160	One month ago	Europe	Male	Istituto Zooprofilattico Sperimentale della Puglia e della Basilicata		2020-11-03	Parisi A. et al	Bari
Sweden/20-53400/2020	GH	45	20A	Sweden	Sweden	Vastra Gotaland	Vastra Gotaland	EPI_ISL_676501	Human	Klinisk Mikrobiologi	B.1.160	3-7 days ago	Europe	Male	The Public Health Agency of Sweden		2020-11-04	Department of Microbiology et al
England/MILK-B5558A/2020	GH		20A	United Kingdom	United Kingdom	England	England	EPI_ISL_657778	Human	Lighthouse Lab in Milton Keynes	B.1.36.1	One week ago	Europe		Wellcome Sanger Institute for the COVID-19 Genomics UK (COG-UK) Consortium		2020-11-05	The Lighthouse Lab in Milton Keynes et al
England/ALDP-B5C073/2020	GH		20A	United Kingdom	United Kingdom	England	England	EPI_ISL_655750	Human	Lighthouse Lab in Alderley Park	B.1.36	One week ago	Europe		Wellcome Sanger Institute for the COVID-19 Genomics UK (COG-UK) Consortium		2020-11-08	Jacquelyn Wynn et al
Denmark/DCGC-9534/2020	GH		20A	Denmark	Denmark	Syddanmark	Syddanmark	EPI_ISL_668504	Human	Department of Virus and Microbiological Special Diagnostics, Statens Serum Institut, Copenhagen, Denmark	B.1.160	3-7 days ago	Europe		Albertsen Lab, Department of Chemistry and Bioscience, Aalborg University, Denmark		2020-11-09	Danish Covid-19 Genome Consortium et al
Belgium/ULG-10881/2020	GH	20	20A	Belgium	Belgium	Li√®ge	Li√®ge	EPI_ISL_678424	Human	Department of Clinical Microbiology	B.1.160	1-2 days ago	Europe	Male	GIGA Medical Genomics		2020-11-13	Keith Durkin et al
Belgium/ULG-10891/2020	GH	65	20A	Belgium	Belgium	Li√®ge	Li√®ge	EPI_ISL_678433	Human	Department of Clinical Microbiology	B.1.160	1-2 days ago	Europe	Male	GIGA Medical Genomics		2020-11-14	Keith Durkin et al
Belgium/ULG-10913/2020	GH	69	20A	Belgium	Belgium	Li√®ge	Li√®ge	EPI_ISL_678454	Human	Department of Clinical Microbiology	B.1.160	1-2 days ago	Europe	Male	GIGA Medical Genomics		2020-11-14	Keith Durkin et al
England/CAMB-1BB9BD/2020	GH		20A	United Kingdom	United Kingdom	England	England	EPI_ISL_679172	Human	Department of Pathology, University of Cambridge	B.1.36	1-2 days ago	Europe		COVID-19 Genomics UK (COG-UK) Consortium		2020-11-18	Aminu S. Jahun et al
Belgium/ULG-10929/2020	GH	56	20A	Belgium	Belgium	Li√®ge	Li√®ge	EPI_ISL_681270	Human	Department of Clinical Microbiology	B.1.160	1-2 days ago	Europe	Female	GIGA Medical Genomics		2020-11-24	Keith Durkin et al
Belgium/ULG-10923/2020	GH	65	20A	Belgium	Belgium	Li√®ge	Li√®ge	EPI_ISL_678463	Human	Department of Clinical Microbiology	B.1.160	1-2 days ago	Europe	Male	GIGA Medical Genomics		2020-11-24	Keith Durkin et al
USA/ID-UNM-IBL158/2020	GH		20C	USA	USA	Idaho	Idaho	EPI_ISL_632855	Human	Idaho Bureau of Laboratories	B.1.2	One month ago	North America		Center for Global Health, University of New Mexico Health Sciences Center		2020-03-22	Daryl Domman et al
USA/MS-CDC-6583/2020	GH	56	20C	USA	USA	Mississippi	Mississippi	EPI_ISL_648033	Human	MS Public Health Laboratory	B.1.2	One month ago	North America	Male	Pathogen Discovery, Respiratory Viruses Branch, Division of Viral Diseases, Centers for Disease Control and Prevention		2020-04-01	Yan Li et al B		MW279451.1
USA/ID-UNM-IBL519/2020	GH		20C	USA	USA	Idaho	Idaho	EPI_ISL_632862	Human	Idaho Bureau of Laboratories	B.1.2	One month ago	North America		Center for Global Health, University of New Mexico Health Sciences Center		2020-04-03	Daryl Domman et al
USA/NY-NYCPHL-000170/2020	GH	80	20C	USA	USA	New York	New York	EPI_ISL_631706	Human	Jamaica Hospital Medical Center	B.1.3	One month ago	North America	Male	New York City Public Health Laboratory		2020-04-11	Jade Wang et al	New York City
USA/RI-CDC-8135/2020	GH	97	20A	USA	USA	Rhode Island	Rhode Island	EPI_ISL_647985	Human	RI State Health Laboratories	B.1	One month ago	North America	Male	Pathogen Discovery, Respiratory Viruses Branch, Division of Viral Diseases, Centers for Disease Control and Prevention		2020-04-22	Yan Li et al B		MW279413.1
USA/NY-NYCPHL-000463/2020	GH	59	20A	USA	USA	New York	New York	EPI_ISL_631933	Human	St Barnabas Hospital	B.1.160.1	One month ago	North America	Male	New York City Public Health Laboratory		2020-05-07	Jade Wang et al	New York City
USA/CO-CDPHE-2005300277/2020	GH		20C	USA	USA	Colorado	Colorado	EPI_ISL_677292	Human	Colorado Department of Public Health and Environment	B.1	3-7 days ago	North America		Colorado Department of Puplic Health and Environment		2020-05-29	Laura Bankers et al
USA/NY-Wadsworth-152382-01/2020	GH	20	20C	USA	USA	New York	New York	EPI_ISL_676985	Human	Wadsworth Center, New York State Department.of Health	B.1	3-7 days ago	North America	Male	Wadsworth Center, New York State Department.of Health		2020-06-25	Kirsten St. George et al	Herkimer County
USA/CO-CDPHE-2007102755/2020	GH		20C	USA	USA	Colorado	Colorado	EPI_ISL_677251	Human	Colorado Department of Public Health and Environment	B.1.3	3-7 days ago	North America		Colorado Department of Puplic Health and Environment		2020-07-09	Laura Bankers et al
USA/CA-ALSR-4602/2020	GH		20C	USA	USA	West Virginia	West Virginia	EPI_ISL_667032	Human	San Diego County Public Health Laboratory	B.1	3-7 days ago	North America		Andersen lab at Scripps Research		2020-07-10	SEARCH Alliance San Diego with Tracy Basler et al	Kanawha
USA/LA-EVTL732/2020	GH	49	20C	USA	USA	Louisiana	Louisiana	EPI_ISL_653423	Human	LSUHS Emerging Viral Threat Laboratory	B.1.2	One month ago	North America	Female	Microbial Genome Sequencing Center		2020-07-16	Jeremy P. Kamil et al	Caddo Parish
USA/OR-OHSU-2029/2020	GH	20	20C	USA	USA	Oregon	Oregon	EPI_ISL_667096	Human	OHSU Lab Services Molecular Microbiology Lab	B.1	3-7 days ago	North America	Female	Oregon SARS-CoV-2 Genome Sequencing Center		2020-07-31	Brendan L. O'Connell et al	Wasco County
USA/NY-Wadsworth-226517-01/2020	GH	68	20C	USA	USA	New York	New York	EPI_ISL_677127	Human	Masonic Medical Research Institute	B.1.3	3-7 days ago	North America	Male	Wadsworth Center, New York State Department.of Health		2020-08-03	Nathan Tucker et al	Oneida County
USA/CO-CDPHE-2008063119/2020	GH		20C	USA	USA	Colorado	Colorado	EPI_ISL_677299	Human	Colorado Department of Public Health and Environment	B.1	3-7 days ago	North America		Colorado Department of Puplic Health and Environment		2020-08-05	Laura Bankers et al
USA/CO-CDPHE-2008060436/2020	GH		20C	USA	USA	Colorado	Colorado	EPI_ISL_677265	Human	Colorado Department of Public Health and Environment	B.1.3	3-7 days ago	North America		Colorado Department of Puplic Health and Environment		2020-08-05	Laura Bankers et al
USA/OR-OHSU-2197/2020	GH	30	20C	USA	USA	Oregon	Oregon	EPI_ISL_667144	Human	OHSU Lab Services Molecular Microbiology Lab	B.1.2	3-7 days ago	North America	Female	Oregon SARS-CoV-2 Genome Sequencing Center		2020-08-06	Brendan L. O'Connell et al	Multnomah County
USA/OR-OHSU-2305/2020	GH	39	20C	USA	USA	Oregon	Oregon	EPI_ISL_667177	Human	OHSU Lab Services Molecular Microbiology Lab	B.1.2	3-7 days ago	North America	Female	Oregon SARS-CoV-2 Genome Sequencing Center		2020-08-10	Brendan L. O'Connell et al	Washington County OR
USA/LA-EVTL947/2020	GH	91	20C	USA	USA	Louisiana	Louisiana	EPI_ISL_653638	Human	LSUHS Emerging Viral Threat Laboratory	B.1.2	One month ago	North America	Male	Microbial Genome Sequencing Center		2020-08-13	Jeremy P. Kamil et al	Bossier Parish
USA/OR-OHSU-2463/2020	GH	8	20C	USA	USA	Oregon	Oregon	EPI_ISL_667216	Human	OHSU Lab Services Molecular Microbiology Lab	B.1.2	3-7 days ago	North America	Female	Oregon SARS-CoV-2 Genome Sequencing Center		2020-08-15	Brendan L. O'Connell et al	Marion County OR
USA/CO-CDPHE-2008161388/2020	GH		20A	USA	USA	Colorado	Colorado	EPI_ISL_677301	Human	Colorado Department of Public Health and Environment	B.1	3-7 days ago	North America		Colorado Department of Puplic Health and Environment		2020-08-16	Laura Bankers et al
USA/CO-CDPHE-2008170021/2020	GH		20A	USA	USA	Colorado	Colorado	EPI_ISL_677303	Human	Colorado Department of Public Health and Environment	B.1	3-7 days ago	North America		Colorado Department of Puplic Health and Environment		2020-08-16	Laura Bankers et al
USA/CO-CDPHE-2008170075/2020	GH		20C	USA	USA	Colorado	Colorado	EPI_ISL_677304	Human	Colorado Department of Public Health and Environment	B.1.130	3-7 days ago	North America		Colorado Department of Puplic Health and Environment		2020-08-16	Laura Bankers et al
USA/CO-CDPHE-2008170687/2020	GH		20C	USA	USA	Colorado	Colorado	EPI_ISL_677249	Human	Colorado Department of Public Health and Environment	B.1	3-7 days ago	North America		Colorado Department of Puplic Health and Environment		2020-08-17	Laura Bankers et al
USA/TX-DSHS-1398/2020	GH		20C	USA	USA	Texas	Texas	EPI_ISL_676606	Human	Texas Department of State Health Services	B.1.2	3-7 days ago	North America		Texas Department of State Health Services		2020-08-19	Rashmi Tuladhar et al	Parker County
USA/OR-OHSU-2563/2020	GH	28	20C	USA	USA	Oregon	Oregon	EPI_ISL_667253	Human	OHSU Lab Services Molecular Microbiology Lab	B.1.36	3-7 days ago	North America	Male	Oregon SARS-CoV-2 Genome Sequencing Center		2020-08-20	Brendan L. O'Connell et al	Washington County OR
USA/MS-CDC-6517/2020	GH	71	20C	USA	USA	Mississippi	Mississippi	EPI_ISL_648039	Human	MS Public Health Laboratory	B.1	One month ago	North America	Female	Pathogen Discovery, Respiratory Viruses Branch, Division of Viral Diseases, Centers for Disease Control and Prevention		2020-08-22	Yan Li et al B		MW279457.1
USA/MS-CDC-6515/2020	GH	68	20C	USA	USA	Mississippi	Mississippi	EPI_ISL_648038	Human	MS Public Health Laboratory	B.1.2	One month ago	North America	Male	Pathogen Discovery, Respiratory Viruses Branch, Division of Viral Diseases, Centers for Disease Control and Prevention		2020-08-22	Yan Li et al B		MW279456.1
USA/MS-CDC-6585/2020	GH	14	20C	USA	USA	Mississippi	Mississippi	EPI_ISL_648034	Human	MS Public Health Laboratory	B.1.2	One month ago	North America	Male	Pathogen Discovery, Respiratory Viruses Branch, Division of Viral Diseases, Centers for Disease Control and Prevention		2020-08-22	Yan Li et al B		MW279452.1
USA/LA-EVTL1017/2020	GH	90	20C	USA	USA	Louisiana	Louisiana	EPI_ISL_653708	Human	LSUHS Emerging Viral Threat Laboratory	B.1.2	One month ago	North America	Female	Microbial Genome Sequencing Center		2020-08-25	Jeremy P. Kamil et al	Claiborne Parish
USA/FL-BPHL-2206/2020	GH		20A	USA	USA	Florida	Florida	EPI_ISL_666828	Human	Florida Bureau of Public Health Laboratories	B.1.110	3-7 days ago	North America		Florida Bureau of Public Health Laboratories		2020-08-26	Sarah Schmedes et al		MW309482.1
USA/NY-Wadsworth-204636-01/2020	GH	17	20C	USA	USA	New York	New York	EPI_ISL_677088	Human	Wadsworth Center, New York State Department.of Health	B.1.2	3-7 days ago	North America		Wadsworth Center, New York State Department.of Health		2020-08-26	Kirsten St. George et al	Essex County NY
USA/NY-Wadsworth-204625-01/2020	GH	23	20C	USA	USA	New York	New York	EPI_ISL_677083	Human	Wadsworth Center, New York State Department.of Health	B.1.2	3-7 days ago	North America		Wadsworth Center, New York State Department.of Health		2020-08-26	Kirsten St. George et al	Essex County NY
USA/OR-OHSU-2735/2020	GH	41	20C	USA	USA	Oregon	Oregon	EPI_ISL_667296	Human	OHSU Lab Services Molecular Microbiology Lab	B.1.2	3-7 days ago	North America	Male	Oregon SARS-CoV-2 Genome Sequencing Center		2020-08-27	Brendan L. O'Connell et al	Washington County OR
USA/TX-DSHS-1242/2020	GH		20C	USA	USA	Texas	Texas	EPI_ISL_676625	Human	Texas Department of State Health Services	B.1.2	3-7 days ago	North America		Texas Department of State Health Services		2020-08-27	Rashmi Tuladhar et al	Titus County
USA/LA-EVTL1054/2020	GH	65	20C	USA	USA	Louisiana	Louisiana	EPI_ISL_653744	Human	LSUHS Emerging Viral Threat Laboratory	B.1.2	One month ago	North America	Female	Microbial Genome Sequencing Center		2020-08-28	Jeremy P. Kamil et al	Caddo Parish
USA/OR-OHSU-2793/2020	GH	1	20C	USA	USA	Oregon	Oregon	EPI_ISL_667314	Human	OHSU Lab Services Molecular Microbiology Lab	B.1.2	3-7 days ago	North America	Male	Oregon SARS-CoV-2 Genome Sequencing Center		2020-08-31	Brendan L. O'Connell et al	Multnomah County
USA/NY-Wadsworth-207860-01/2020	GH	76	20C	USA	USA	New York	New York	EPI_ISL_677091	Human	Wadsworth Center, New York State Department.of Health	B.1.2	3-7 days ago	North America	Female	Wadsworth Center, New York State Department.of Health		2020-09-01	Kirsten St. George et al	Essex County NY
USA/OR-OHSU-2853/2020	GH	12	20C	USA	USA	Oregon	Oregon	EPI_ISL_667356	Human	OHSU Lab Services Molecular Microbiology Lab	B.1.2	3-7 days ago	North America	Female	Oregon SARS-CoV-2 Genome Sequencing Center		2020-09-02	Brendan L. O'Connell et al	Wasco County
USA/NM-NMDOH-2020324363/2020	GH	35	20C	USA	USA	New Mexico	New Mexico	EPI_ISL_632829	Human	New Mexico Department of Health Scientific Laboratory	B.1.2	One month ago	North America	Male	New Mexico Department of Health Scientific Laboratory		2020-09-02	Ellie Johnson et al		MW269888.1
USA/CO-CDPHE-2009051678/2020	GH		20C	USA	USA	Colorado	Colorado	EPI_ISL_677245	Human	Colorado Department of Public Health and Environment	B.1	3-7 days ago	North America		Colorado Department of Puplic Health and Environment		2020-09-03	Laura Bankers et al
USA/OR-OHSU-2872/2020	GH	44	20C	USA	USA	Oregon	Oregon	EPI_ISL_667375	Human	OHSU Lab Services Molecular Microbiology Lab	B.1.26	3-7 days ago	North America	Female	Oregon SARS-CoV-2 Genome Sequencing Center		2020-09-03	Brendan L. O'Connell et al	Multnomah County
USA/NM-NMDOH-2020330308/2020	GH	20	20C	USA	USA	New Mexico	New Mexico	EPI_ISL_644584	Human	New Mexico Department of Health Scientific Laboratory	B.1.2	One month ago	North America	Female	New Mexico Department of Health Scientific Laboratory		2020-09-03	Ellie Johnson et al
USA/MS-CDC-6561/2020	GH	83	20C	USA	USA	Mississippi	Mississippi	EPI_ISL_648013	Human	MS Public Health Laboratory	B.1.2	One month ago	North America	Female	Pathogen Discovery, Respiratory Viruses Branch, Division of Viral Diseases, Centers for Disease Control and Prevention		2020-09-03	Yan Li et al B		MW279431.1
USA/MS-CDC-6560/2020	GH	87	20C	USA	USA	Mississippi	Mississippi	EPI_ISL_648012	Human	MS Public Health Laboratory	B.1.2	One month ago	North America	Male	Pathogen Discovery, Respiratory Viruses Branch, Division of Viral Diseases, Centers for Disease Control and Prevention		2020-09-03	Yan Li et al B		MW279430.1
USA/MS-CDC-6553/2020	GH	77	20C	USA	USA	Mississippi	Mississippi	EPI_ISL_648008	Human	MS Public Health Laboratory	B.1.2	One month ago	North America	Female	Pathogen Discovery, Respiratory Viruses Branch, Division of Viral Diseases, Centers for Disease Control and Prevention		2020-09-03	Yan Li et al B		MW279426.1
USA/MS-CDC-6558/2020	GH	87	20C	USA	USA	Mississippi	Mississippi	EPI_ISL_648011	Human	MS Public Health Laboratory	B.1.2	One month ago	North America	Female	Pathogen Discovery, Respiratory Viruses Branch, Division of Viral Diseases, Centers for Disease Control and Prevention		2020-09-03	Yan Li et al B		MW279429.1
USA/MS-CDC-6554/2020	GH	90	20C	USA	USA	Mississippi	Mississippi	EPI_ISL_648009	Human	MS Public Health Laboratory	B.1.2	One month ago	North America	Female	Pathogen Discovery, Respiratory Viruses Branch, Division of Viral Diseases, Centers for Disease Control and Prevention		2020-09-03	Yan Li et al B		MW279427.1
USA/MS-CDC-6557/2020	GH	79	20C	USA	USA	Mississippi	Mississippi	EPI_ISL_648010	Human	MS Public Health Laboratory	B.1.2	One month ago	North America	Female	Pathogen Discovery, Respiratory Viruses Branch, Division of Viral Diseases, Centers for Disease Control and Prevention		2020-09-03	Yan Li et al B		MW279428.1
USA/GA-CDC-5478/2020	GH		20C	USA	USA	Georgia	Georgia	EPI_ISL_647987	Human	GA Department of Public Health Laboratory	B.1.2	One month ago	North America		Pathogen Discovery, Respiratory Viruses Branch, Division of Viral Diseases, Centers for Disease Control and Prevention		2020-09-03	Yan Li et al B		MW279417.1
USA/GA-CDC-5479/2020	GH		20C	USA	USA	Georgia	Georgia	EPI_ISL_647988	Human	GA Department of Public Health Laboratory	B.1.2	One month ago	North America		Pathogen Discovery, Respiratory Viruses Branch, Division of Viral Diseases, Centers for Disease Control and Prevention		2020-09-03	Yan Li et al B		MW279418.1
Canada/UN-CRCHUM-PostFreeze-5/2020	GH		20A	Canada	Canada	Canada	Canada	EPI_ISL_667771	Human	Microbiology, Infectious Diseases and Immunology, Centre de Recherche du Centre Hospitalier de l'Universite de Montreal	B.1.160	One week ago	North America		Microbiology, Infectious Diseases and Immunology, Centre de Recherche du Centre Hospitalier de l'Universite de Montreal		2020-09-04	Benoit et al
Canada/UN-CRCHUM-PostFreeze-6/2020	GH		20A	Canada	Canada	Canada	Canada	EPI_ISL_667772	Human	Microbiology, Infectious Diseases and Immunology, Centre de Recherche du Centre Hospitalier de l'Universite de Montreal	B.1	One week ago	North America		Microbiology, Infectious Diseases and Immunology, Centre de Recherche du Centre Hospitalier de l'Universite de Montreal		2020-09-04	Benoit et al
Canada/UN-CRCHUM-PostFreeze-1/2020	GH		20C	Canada	Canada	Canada	Canada	EPI_ISL_667768	Human	Microbiology, Infectious Diseases and Immunology, Centre de Recherche du Centre Hospitalier de l'Universite de Montreal	B.1.3	One week ago	North America		Microbiology, Infectious Diseases and Immunology, Centre de Recherche du Centre Hospitalier de l'Universite de Montreal		2020-09-04	Benoit et al
Canada/UN-CRCHUM-PreFreeze-1/2020	GH		20C	Canada	Canada	Canada	Canada	EPI_ISL_667758	Human	Microbiology, Infectious Diseases and Immunology, Centre de Recherche du Centre Hospitalier de l'Universite de Montreal	B.1.3	One week ago	North America		Microbiology, Infectious Diseases and Immunology, Centre de Recherche du Centre Hospitalier de l'Universite de Montreal		2020-09-04	Benoit et al
Canada/UN-CRCHUM-PreFreeze-3/2020	GH		20C	Canada	Canada	Canada	Canada	EPI_ISL_667760	Human	Microbiology, Infectious Diseases and Immunology, Centre de Recherche du Centre Hospitalier de l'Universite de Montreal	B.1.3	One week ago	North America		Microbiology, Infectious Diseases and Immunology, Centre de Recherche du Centre Hospitalier de l'Universite de Montreal		2020-09-04	Benoit et al
USA/OR-OHSU-2895/2020	GH	34	20C	USA	USA	Oregon	Oregon	EPI_ISL_667395	Human	OHSU Lab Services Molecular Microbiology Lab	B.1.2	3-7 days ago	North America	Female	Oregon SARS-CoV-2 Genome Sequencing Center		2020-09-04	Brendan L. O'Connell et al	Multnomah County
USA/OR-OHSU-2908/2020	GH	25	20C	USA	USA	Oregon	Oregon	EPI_ISL_667407	Human	OHSU Lab Services Molecular Microbiology Lab	B.1.2	3-7 days ago	North America	Male	Oregon SARS-CoV-2 Genome Sequencing Center		2020-09-04	Brendan L. O'Connell et al	Multnomah County
USA/NY-NYCPHL-001042/2020	GH	65	20A	USA	USA	New York	New York	EPI_ISL_633054	Human	DOHMH PHL	B.1.12	One month ago	North America	Male	New York City Public Health Laboratory		2020-09-08	Jade Wang et al	New York City
USA/NY-NYCPHL-000939/2020	GH	27	20C	USA	USA	New York	New York	EPI_ISL_671674	Human	DOHMH Corona	B.1	3-7 days ago	North America	Male	New York City Public Health Laboratory		2020-09-10	Jade Wang et al	New York City
USA/VA-DCLS-1739/2020	GH		20C	USA	USA	Virginia	Virginia	EPI_ISL_644844	Human	Virginia DCLS	B.1.2	One month ago	North America		Virginia DCLS		2020-09-10	Virginia DCLS et al		MW280486.1
USA/MS-CDC-6564/2020	GH	93	20C	USA	USA	Mississippi	Mississippi	EPI_ISL_648016	Human	MS Public Health Laboratory	B.1.2	One month ago	North America	Female	Pathogen Discovery, Respiratory Viruses Branch, Division of Viral Diseases, Centers for Disease Control and Prevention		2020-09-15	Yan Li et al B		MW279434.1
ElSalvador/INS-01/2020	GH		20C	El Salvador	El Salvador	San Salvador	San Salvador	EPI_ISL_671974	Human	Laboratorio de Virolog√≠a y Microbiolog√≠a Molecular, Depto. de Microbiolog√≠a, Facultad de Medicina, Universidad de El Salvador/INS-laboratorio de Ref. Ministerio de Salud	B.1.2	3-7 days ago	North America		Laboratorio de Virolog√≠a y Microbiolog√≠a Molecular, Depto. de Microbiolog√≠a, Facultad de Medicina, Universidad de El Salvador/INS-laboratorio de Ref. Ministerio de Salud		2020-09-16	Rivera NR et al
USA/NY-Wadsworth-220320-01/2020	GH	19	20C	USA	USA	New York	New York	EPI_ISL_677103	Human	Wadsworth Center, New York State Department.of Health	B.1.3	3-7 days ago	North America	Male	Wadsworth Center, New York State Department.of Health		2020-09-17	Kirsten St. George et al	Chemung County
USA/IA-GMF-21344/2020	GH		20C	USA	USA	Iowa	Iowa	EPI_ISL_660831	Human	Gundersen Molecular Diagnostics Laboratory	B.1	One week ago	North America		Kabara Cancer Research Institute		2020-09-20	Craig S. Richmond et al A	Winneshiek County
USA/GA-CDC-6467/2020	GH		20A	USA	USA	Georgia	Georgia	EPI_ISL_648003	Human	GA Department of Public Health Laboratory	B.1	One month ago	North America		Pathogen Discovery, Respiratory Viruses Branch, Division of Viral Diseases, Centers for Disease Control and Prevention		2020-09-22	Yan Li et al B		MW279421.1
USA/GA-CDC-6466/2020	GH		20C	USA	USA	Georgia	Georgia	EPI_ISL_648002	Human	GA Department of Public Health Laboratory	B.1.2	One month ago	North America		Pathogen Discovery, Respiratory Viruses Branch, Division of Viral Diseases, Centers for Disease Control and Prevention		2020-09-22	Yan Li et al B		MW279420.1
USA/UT-UPHL-201131911/2020	GH		20C	USA	USA	Utah	Utah	EPI_ISL_628934	Human	Utah Public Health Laboratory	B.1.2	One month ago	North America		Utah Public Health Laboratory		2020-09-23	Erin Young et al		MW241386.1
USA/IL-UW-1981/2020	GH		20C	USA	USA	Illinois	Illinois	EPI_ISL_677389	Human	University of Wisconsin-Madison AIDS Vaccine Research Laboratories	B.1.2	3-7 days ago	North America		University of Wisconsin-Madison AIDS Vaccine Research Laboratories		2020-09-23	Gage Moreno et al A	Winnebago County IL
USA/WI-GMF-22343/2020	GH		20C	USA	USA	Wisconsin	Wisconsin	EPI_ISL_660855	Human	Gundersen Molecular Diagnostics Laboratory	B.1.2	One week ago	North America		Kabara Cancer Research Institute		2020-09-25	Craig S. Richmond et al A	La Crosse County
USA/UT-UPHL-201114380/2020	GH		20C	USA	USA	Utah	Utah	EPI_ISL_628947	Human	Utah Public Health Laboratory	B.1.36	One month ago	North America		Utah Public Health Laboratory		2020-09-26	Erin Young et al		MW241379.1
USA/WI-UW-2218/2020	GH		20C	USA	USA	Wisconsin	Wisconsin	EPI_ISL_677621	Human	University of Wisconsin-Madison AIDS Vaccine Research Laboratories	B.1.2	3-7 days ago	North America		University of Wisconsin-Madison AIDS Vaccine Research Laboratories		2020-09-27	Gage Moreno et al A	Dane County
USA/UT-UPHL-201116688/2020	GH		20C	USA	USA	Utah	Utah	EPI_ISL_628939	Human	Utah Public Health Laboratory	B.1.2	One month ago	North America		Utah Public Health Laboratory		2020-09-28	Erin Young et al		MW241380.1
USA/UT-UPHL-201125055/2020	GH		20C	USA	USA	Utah	Utah	EPI_ISL_628940	Human	Utah Public Health Laboratory	B.1.2	One month ago	North America		Utah Public Health Laboratory		2020-09-28	Erin Young et al		MW241383.1
USA/NY-NYCPHL-000952/2020	GH	60	20C	USA	USA	New York	New York	EPI_ISL_632989	Human	DOHMH Corona	B.1.26	One month ago	North America	Female	New York City Public Health Laboratory		2020-09-29	Jade Wang et al	New York City
USA/IL-UW-2130/2020	GH		20C	USA	USA	Illinois	Illinois	EPI_ISL_677535	Human	University of Wisconsin-Madison AIDS Vaccine Research Laboratories	B.1.2	3-7 days ago	North America		University of Wisconsin-Madison AIDS Vaccine Research Laboratories		2020-09-29	Gage Moreno et al A	Winnebago County IL
USA/UT-UPHL-201117948/2020	GH		20A	USA	USA	Utah	Utah	EPI_ISL_628960	Human	Utah Public Health Laboratory	B.1.162	One month ago	North America		Utah Public Health Laboratory		2020-09-30	Erin Young et al
USA/OR-OHSU-3048/2020	GH	21	20C	USA	USA	Oregon	Oregon	EPI_ISL_667458	Human	OHSU Lab Services Molecular Microbiology Lab	B.1	3-7 days ago	North America	Female	Oregon SARS-CoV-2 Genome Sequencing Center		2020-09-30	Brendan L. O'Connell et al	Washington County OR
USA/NY-NYCPHL-000976/2020	GH	23	20C	USA	USA	New York	New York	EPI_ISL_633005	Human	DOHMH Jamaica	B.1	One month ago	North America	Female	New York City Public Health Laboratory		2020-09-30	Jade Wang et al	New York City
Canada/ON-UHTC-0371/2020	GH		20A	Canada	Canada	Ontario	Ontario	EPI_ISL_671664	Human	Unity Health Toronto	B.1	3-7 days ago	North America		Ontario Institute for Cancer Research		2020-10-01	Ramzi Fattouh et al
USA/CA-ALSR-4320/2020	GH		20C	USA	USA	Georgia	Georgia	EPI_ISL_648969	Human	San Diego County Public Health Laboratory	B.1.2	One month ago	North America		Andersen lab at Scripps Research		2020-10-02	SEARCH Alliance San Diego with Tracy Basler et al	Cobb
USA/IA-GMF-23570/2020	GH		20C	USA	USA	Iowa	Iowa	EPI_ISL_660876	Human	Gundersen Clinical Microbiology Laboratory	B.1.2	One week ago	North America		Kabara Cancer Research Institute		2020-10-02	Craig S. Richmond et al A	Winneshiek County
USA/IL-UW-2018/2020	GH		20C	USA	USA	Illinois	Illinois	EPI_ISL_677425	Human	University of Wisconsin-Madison AIDS Vaccine Research Laboratories	B.1.2	3-7 days ago	North America		University of Wisconsin-Madison AIDS Vaccine Research Laboratories		2020-10-03	Gage Moreno et al A	Ogle County IL
USA/NE-UW-2116/2020	GH		20C	USA	USA	Nebraska	Nebraska	EPI_ISL_677521	Human	University of Wisconsin-Madison AIDS Vaccine Research Laboratories	B.1.2	3-7 days ago	North America		University of Wisconsin-Madison AIDS Vaccine Research Laboratories		2020-10-03	Gage Moreno et al A	Lancaster County
Canada/ON-UHTC-0375/2020	GH		20A	Canada	Canada	Ontario	Ontario	EPI_ISL_671654	Human	Unity Health Toronto	B.1	3-7 days ago	North America		Ontario Institute for Cancer Research		2020-10-04	Ramzi Fattouh et al
USA/WA-OHSU-3149/2020	GH	41	20C	USA	USA	Washington	Washington	EPI_ISL_667494	Human	OHSU Lab Services Molecular Microbiology Lab	B.1	3-7 days ago	North America	Female	Oregon SARS-CoV-2 Genome Sequencing Center		2020-10-05	Brendan L. O'Connell et al	Clark County WA
USA/OR-OHSU-3165/2020	GH	42	20C	USA	USA	Oregon	Oregon	EPI_ISL_667496	Human	OHSU Lab Services Molecular Microbiology Lab	B.1	3-7 days ago	North America	Male	Oregon SARS-CoV-2 Genome Sequencing Center		2020-10-05	Brendan L. O'Connell et al	Multnomah County
USA/NY-NYCPHL-001011/2020	GH	24	20A	USA	USA	New York	New York	EPI_ISL_633031	Human	DOHMH Chelsea	B.1	One month ago	North America	Male	New York City Public Health Laboratory		2020-10-06	Jade Wang et al	New York City
USA/VA-DCLS-1978/2020	GH		20C	USA	USA	Virginia	Virginia	EPI_ISL_644893	Human	Virginia DCLS	B.1.2	One month ago	North America		Virginia DCLS		2020-10-06	Virginia DCLS et al		MW280506.1
USA/VA-DCLS-1975/2020	GH		20C	USA	USA	Virginia	Virginia	EPI_ISL_644891	Human	Virginia DCLS	B.1.26	One month ago	North America		Virginia DCLS		2020-10-07	Virginia DCLS et al		MW280505.1
USA/UT-UPHL-201103251/2020	GH		20C	USA	USA	Utah	Utah	EPI_ISL_628944	Human	Utah Public Health Laboratory	B.1.2	One month ago	North America		Utah Public Health Laboratory		2020-10-08	Erin Young et al		MW241365.1
USA/CO-CDPHE-2010112609/2020	GH		20C	USA	USA	Colorado	Colorado	EPI_ISL_677263	Human	Colorado Department of Public Health and Environment	B.1.2	3-7 days ago	North America		Colorado Department of Puplic Health and Environment		2020-10-08	Laura Bankers et al
USA/IL-UW-2063/2020	GH		20C	USA	USA	Illinois	Illinois	EPI_ISL_677468	Human	University of Wisconsin-Madison AIDS Vaccine Research Laboratories	B.1.2	3-7 days ago	North America		University of Wisconsin-Madison AIDS Vaccine Research Laboratories		2020-10-09	Gage Moreno et al A	Winnebago County IL
USA/UT-UPHL-201103500/2020	GH		20C	USA	USA	Utah	Utah	EPI_ISL_628953	Human	Utah Public Health Laboratory	B.1.36	One month ago	North America		Utah Public Health Laboratory		2020-10-12	Erin Young et al		MW241366.1
USA/VA-DCLS-2006/2020	GH		20C	USA	USA	Virginia	Virginia	EPI_ISL_644907	Human	Virginia DCLS	B.1.2	One month ago	North America		Virginia DCLS		2020-10-14	Virginia DCLS et al		MW280520.1
USA/VA-DCLS-2022/2020	GH		20C	USA	USA	Virginia	Virginia	EPI_ISL_677170	Human	Virginia Division of Consolidated Laboratory Services	B.1.2	3-7 days ago	North America		Virginia Division of Consolidated Laboratory Services		2020-10-14	Virginia DCLS et al
USA/WI-UW-2156/2020	GH		20C	USA	USA	Wisconsin	Wisconsin	EPI_ISL_677560	Human	University of Wisconsin-Madison AIDS Vaccine Research Laboratories	B.1.2	3-7 days ago	North America		University of Wisconsin-Madison AIDS Vaccine Research Laboratories		2020-10-15	Gage Moreno et al A	Columbia County WI
USA/IA-GMF-25958/2020	GH		20C	USA	USA	Iowa	Iowa	EPI_ISL_660942	Human	Gundersen Molecular Diagnostics Laboratory	B.1.2	One week ago	North America		Kabara Cancer Research Institute		2020-10-15	Craig S. Richmond et al A	Allamakee County
USA/WI-UW-2153/2020	GH		20C	USA	USA	Wisconsin	Wisconsin	EPI_ISL_677557	Human	University of Wisconsin-Madison AIDS Vaccine Research Laboratories	B.1.2	3-7 days ago	North America		University of Wisconsin-Madison AIDS Vaccine Research Laboratories		2020-10-15	Gage Moreno et al A	Dane County
USA/MD-MDH-0306/2020	GH		20C	USA	USA	Maryland	Maryland	EPI_ISL_633087	Human	MD PHL	B.1.3	One month ago	North America		MD PHL		2020-10-17	Maryland Department of Health Laboratories Administration et al		MW244001.1
USA/WI-GMF-26493/2020	GH		20C	USA	USA	Wisconsin	Wisconsin	EPI_ISL_660952	Human	Gundersen Molecular Diagnostics Laboratory	B.1.2	One week ago	North America		Kabara Cancer Research Institute		2020-10-18	Craig S. Richmond et al A	La Crosse County
USA/IL-UW-2079/2020	GH		20C	USA	USA	Illinois	Illinois	EPI_ISL_677484	Human	University of Wisconsin-Madison AIDS Vaccine Research Laboratories	B.1.2	3-7 days ago	North America		University of Wisconsin-Madison AIDS Vaccine Research Laboratories		2020-10-19	Gage Moreno et al A	Winnebago County IL
USA/MI-MDHHS-SC22271/2020	GH		20C	USA	USA	Michigan	Michigan	EPI_ISL_666937	Human	Michigan Department of Health and Human Services, Bureau of Laboratories	B.1	3-7 days ago	North America		Michigan Department of Health and Human Services, Bureau of Laboratories		2020-10-20	Blankenship HM et al
USA/NY-NYCPHL-001090/2020	GH	34	20C	USA	USA	New York	New York	EPI_ISL_671681	Human	DOHMH Corona	B.1.26	3-7 days ago	North America	Female	New York City Public Health Laboratory		2020-10-21	Jade Wang et al	New York City
USA/OR-OHSU-3743/2020	GH	16	20C	USA	USA	Oregon	Oregon	EPI_ISL_667511	Human	OHSU Lab Services Molecular Microbiology Lab	B.1.2	3-7 days ago	North America	Female	Oregon SARS-CoV-2 Genome Sequencing Center		2020-10-21	Brendan L. O'Connell et al	Washington County OR
USA/WI-UW-2187/2020	GH		20C	USA	USA	Wisconsin	Wisconsin	EPI_ISL_677590	Human	University of Wisconsin-Madison AIDS Vaccine Research Laboratories	B.1.2	3-7 days ago	North America		University of Wisconsin-Madison AIDS Vaccine Research Laboratories		2020-10-21	Gage Moreno et al A	Dane County
USA/NY-NYCPHL-001123/2020	GH	31	20C	USA	USA	New York	New York	EPI_ISL_671706	Human	DOHMH Jamaica	B.1	3-7 days ago	North America	Male	New York City Public Health Laboratory		2020-10-22	Jade Wang et al	New York City
USA/NY-NYCPHL-001122/2020	GH	36	20C	USA	USA	Connecticut	Connecticut	EPI_ISL_671705	Human	DOHMH Corona	B.1.2	3-7 days ago	North America	Male	New York City Public Health Laboratory		2020-10-22	Jade Wang et al	Gales Ferry
USA/WI-GMF-27162/2020	GH		20C	USA	USA	Wisconsin	Wisconsin	EPI_ISL_660970	Human	Gundersen Molecular Diagnostics Laboratory	B.1.2	One week ago	North America		Kabara Cancer Research Institute		2020-10-22	Craig S. Richmond et al A	La Crosse County
USA/MI-UM-10036587493/2020	GH		20C	USA	USA	Michigan	Michigan	EPI_ISL_649984	Human	University of Michigan Clinical Microbiology Laboratory	B.1.2	One month ago	North America		Lauring Lab, University of Michigan, Department of Microbiology and Immunology		2020-10-23	Valesano et al
USA/IA-GMF-27699/2020	GH		20C	USA	USA	Iowa	Iowa	EPI_ISL_660987	Human	Gundersen Molecular Diagnostics Laboratory	B.1.2	One week ago	North America		Kabara Cancer Research Institute		2020-10-25	Craig S. Richmond et al A	Allamakee County
USA/MD-MDH-0371/2020	GH		20C	USA	USA	Maryland	Maryland	EPI_ISL_660072	Human	MD PHL	B.1.3	One week ago	North America		MD PHL		2020-10-26	Maryland Department of Health Laboratories Administration et al		MW292630.1
USA/MD-MDH-0378/2020	GH		20C	USA	USA	Maryland	Maryland	EPI_ISL_660101	Human	MD PHL	B.1.3	One week ago	North America		MD PHL		2020-10-26	Maryland Department of Health Laboratories Administration et al		MW292637.1
USA/MI-UM-10036631440/2020	GH		20C	USA	USA	Michigan	Michigan	EPI_ISL_650082	Human	University of Michigan Clinical Microbiology Laboratory	B.1.2	One month ago	North America		Lauring Lab, University of Michigan, Department of Microbiology and Immunology		2020-10-26	Valesano et al
USA/NY-NYCPHL-001132/2020	GH	24	20C	USA	USA	New Jersey	New Jersey	EPI_ISL_671715	Human	DOHMH PHL	B.1.2	3-7 days ago	North America	Female	New York City Public Health Laboratory		2020-10-26	Jade Wang et al	Paterson
USA/NY-NYCPHL-001133/2020	GH	38	20C	USA	USA	New Jersey	New Jersey	EPI_ISL_671716	Human	DOHMH PHL	B.1.2	3-7 days ago	North America	Male	New York City Public Health Laboratory		2020-10-26	Jade Wang et al	Paterson
USA/MI-MDHHS-SC22294/2020	GH		20C	USA	USA	Michigan	Michigan	EPI_ISL_666960	Human	Michigan Department of Health and Human Services, Bureau of Laboratories	B.1.2	3-7 days ago	North America		Michigan Department of Health and Human Services, Bureau of Laboratories		2020-10-26	Blankenship HM et al
USA/MN-MDH-1992/2020	GH		20C	USA	USA	Minnesota	Minnesota	EPI_ISL_634866	Human	Minnesota Department of Health, Public Health Laboratory	B.1	One month ago	North America		Minnesota Department of Health, Public Health Laboratory		2020-10-28	Matt Plumb et al		MW246601.1
USA/IA-GMF-28410/2020	GH		20C	USA	USA	Iowa	Iowa	EPI_ISL_661018	Human	Gundersen Molecular Diagnostics Laboratory	B.1.2	One week ago	North America		Kabara Cancer Research Institute		2020-10-28	Craig S. Richmond et al A	Allamakee County
USA/IA-GMF-28426/2020	GH		20C	USA	USA	Iowa	Iowa	EPI_ISL_661021	Human	Gundersen Molecular Diagnostics Laboratory	B.1.2	One week ago	North America		Kabara Cancer Research Institute		2020-10-28	Craig S. Richmond et al A	Allamakee County
USA/MN-MDH-1997/2020	GH		20C	USA	USA	Minnesota	Minnesota	EPI_ISL_634871	Human	Minnesota Department of Health, Public Health Laboratory	B.1	One month ago	North America		Minnesota Department of Health, Public Health Laboratory		2020-10-29	Matt Plumb et al		MW246596.1
USA/MI-UM-10036681654/2020	GH		20C	USA	USA	Michigan	Michigan	EPI_ISL_650066	Human	University of Michigan Clinical Microbiology Laboratory	B.1.2	One month ago	North America		Lauring Lab, University of Michigan, Department of Microbiology and Immunology		2020-10-29	Valesano et al
USA/MI-UM-10036683501/2020	GH		20C	USA	USA	Michigan	Michigan	EPI_ISL_650084	Human	University of Michigan Clinical Microbiology Laboratory	B.1.2	One month ago	North America		Lauring Lab, University of Michigan, Department of Microbiology and Immunology		2020-10-29	Valesano et al
USA/OR-OHSU-4128/2020	GH	26	20C	USA	USA	Oregon	Oregon	EPI_ISL_667527	Human	OHSU Lab Services Molecular Microbiology Lab	B.1.2	3-7 days ago	North America	Female	Oregon SARS-CoV-2 Genome Sequencing Center		2020-10-30	Brendan L. O'Connell et al
Mexico/AGS-InDRE-89/2020	GH	37	20C	Mexico	Mexico	Aguascalientes	Aguascalientes	EPI_ISL_658891	Human	Instituto de Diagnostico y Referencia Epidemiologicos (INDRE)	B.1.2	One week ago	North America	Male	Instituto de Diagnostico y Referencia Epidemiologicos (INDRE)		2020-11-01	Ernesto Ramirez-Gonzalez et al
USA/WI-GMF-30639/2020	GH		20C	USA	USA	Wisconsin	Wisconsin	EPI_ISL_661044	Human	Gundersen Molecular Diagnostics Laboratory	B.1.2	One week ago	North America		Kabara Cancer Research Institute		2020-11-01	Craig S. Richmond et al A	La Crosse County
USA/CO-CDPHE-2011020335/2020	GH		20C	USA	USA	Colorado	Colorado	EPI_ISL_677319	Human	Colorado Department of Public Health and Environment	B.1.2	3-7 days ago	North America		Colorado Department of Puplic Health and Environment		2020-11-01	Laura Bankers et al
USA/MI-MDHHS-SC22278/2020	GH		20C	USA	USA	Michigan	Michigan	EPI_ISL_666944	Human	Michigan Department of Health and Human Services, Bureau of Laboratories	B.1.2	3-7 days ago	North America		Michigan Department of Health and Human Services, Bureau of Laboratories		2020-11-01	Blankenship HM et al
Mexico/AGS-InDRE-86/2020	GH	45	20A	Mexico	Mexico	Aguascalientes	Aguascalientes	EPI_ISL_658883	Human	Instituto de Diagnostico y Referencia Epidemiologicos (INDRE)	B.1	One week ago	North America	Female	Instituto de Diagnostico y Referencia Epidemiologicos (INDRE)		2020-11-02	Ernesto Ramirez-Gonzalez et al
USA/OR-OHSU-4152/2020	GH	53	20C	USA	USA	Oregon	Oregon	EPI_ISL_667529	Human	OHSU Lab Services Molecular Microbiology Lab	B.1.2	3-7 days ago	North America	Male	Oregon SARS-CoV-2 Genome Sequencing Center		2020-11-02	Brendan L. O'Connell et al
USA/WI-GMF-30874/2020	GH		20C	USA	USA	Wisconsin	Wisconsin	EPI_ISL_661061	Human	Gundersen Molecular Diagnostics Laboratory	B.1	One week ago	North America		Kabara Cancer Research Institute		2020-11-02	Craig S. Richmond et al A	La Crosse County
USA/CA-CZB-13243/2020	GH		20C	USA	USA	California	California	EPI_ISL_672482	Human	Orange County Public Health Lab	B.1	3-7 days ago	North America		Chan-Zuckerberg Biohub		2020-11-02	CZB Cliahub Consortium et al B	Orange County CA
USA/MN-GMF-30776/2020	GH		20C	USA	USA	Minnesota	Minnesota	EPI_ISL_661050	Human	Gundersen Molecular Diagnostics Laboratory	B.1	One week ago	North America		Kabara Cancer Research Institute		2020-11-02	Craig S. Richmond et al A	Winona County
USA/MD-MDH-0392/2020	GH		20C	USA	USA	Maryland	Maryland	EPI_ISL_660086	Human	MD PHL	B.1	One week ago	North America		MD PHL		2020-11-02	Maryland Department of Health Laboratories Administration et al		MW292651.1
Mexico/QRO-InDRE-84/2020	GH	23	20C	Mexico	Mexico	Queretaro	Queretaro	EPI_ISL_658878	Human	Instituto de Diagnostico y Referencia Epidemiologicos (INDRE)	B.1.26	One week ago	North America	Male	Instituto de Diagnostico y Referencia Epidemiologicos (INDRE)		2020-11-02	Ernesto Ramirez-Gonzalez et al
USA/CA-CZB-13532/2020	GH		20C	USA	USA	California	California	EPI_ISL_672067	Human	Madera County Department of Public Health	B.1.2	3-7 days ago	North America		Chan-Zuckerberg Biohub		2020-11-02	CZB Cliahub Consortium et al B	Madera County
Mexico/AGS-InDRE-83/2020	GH	26	20C	Mexico	Mexico	Aguascalientes	Aguascalientes	EPI_ISL_658875	Human	Instituto de Diagnostico y Referencia Epidemiologicos (INDRE)	B.1.2	One week ago	North America	Female	Instituto de Diagnostico y Referencia Epidemiologicos (INDRE)		2020-11-02	Gisela Barrera-Badillo et al
USA/WI-UW-2230/2020	GH		20C	USA	USA	Wisconsin	Wisconsin	EPI_ISL_677633	Human	University of Wisconsin-Madison AIDS Vaccine Research Laboratories	B.1.2	3-7 days ago	North America		University of Wisconsin-Madison AIDS Vaccine Research Laboratories		2020-11-02	Gage Moreno et al A	Dane County
USA/CA-CZB-13528/2020	GH		20C	USA	USA	California	California	EPI_ISL_672505	Human	Madera County Department of Public Health	B.1.3	3-7 days ago	North America		Chan-Zuckerberg Biohub		2020-11-03	CZB Cliahub Consortium et al B	Madera County
USA/MI-MDHHS-SC22275/2020	GH		20C	USA	USA	Michigan	Michigan	EPI_ISL_666941	Human	Michigan Department of Health and Human Services, Bureau of Laboratories	B.1	3-7 days ago	North America		Michigan Department of Health and Human Services, Bureau of Laboratories		2020-11-03	Blankenship HM et al
USA/MI-MDHHS-SC22241/2020	GH		20C	USA	USA	Michigan	Michigan	EPI_ISL_666907	Human	Michigan Department of Health and Human Services, Bureau of Laboratories	B.1	3-7 days ago	North America		Michigan Department of Health and Human Services, Bureau of Laboratories		2020-11-03	Blankenship HM et al
USA/OR-OHSU-4315/2020	GH	26	20C	USA	USA	Oregon	Oregon	EPI_ISL_667535	Human	OHSU Lab Services Molecular Microbiology Lab	B.1.2	3-7 days ago	North America	Male	Oregon SARS-CoV-2 Genome Sequencing Center		2020-11-03	Brendan L. O'Connell et al
USA/MI-MDHHS-SC22283/2020	GH		20C	USA	USA	Michigan	Michigan	EPI_ISL_666949	Human	Michigan Department of Health and Human Services, Bureau of Laboratories	B.1.2	3-7 days ago	North America		Michigan Department of Health and Human Services, Bureau of Laboratories		2020-11-03	Blankenship HM et al
USA/WI-GMF-31258/2020	GH		20C	USA	USA	Wisconsin	Wisconsin	EPI_ISL_661080	Human	Gundersen Molecular Diagnostics Laboratory	B.1.2	One week ago	North America		Kabara Cancer Research Institute		2020-11-03	Craig S. Richmond et al A	La Crosse County
USA/MI-MDHHS-SC22233/2020	GH		20C	USA	USA	Michigan	Michigan	EPI_ISL_666899	Human	Michigan Department of Health and Human Services, Bureau of Laboratories	B.1.2	3-7 days ago	North America		Michigan Department of Health and Human Services, Bureau of Laboratories		2020-11-03	Blankenship HM et al
USA/MD-MDH-0404/2020	GH		20C	USA	USA	Maryland	Maryland	EPI_ISL_660103	Human	MD PHL	B.1.3	One week ago	North America		MD PHL		2020-11-04	Maryland Department of Health Laboratories Administration et al		MW292663.1
USA/MI-MDHHS-SC22232/2020	GH		20C	USA	USA	Michigan	Michigan	EPI_ISL_666898	Human	Michigan Department of Health and Human Services, Bureau of Laboratories	B.1.26	3-7 days ago	North America		Michigan Department of Health and Human Services, Bureau of Laboratories		2020-11-04	Blankenship HM et al
USA/MD-MDH-0410/2020	GH		20C	USA	USA	Maryland	Maryland	EPI_ISL_666780	Human	Maryland Public Health Laboratory	B.1.2	3-7 days ago	North America		Maryland Public Health Laboratory		2020-11-04	Maryland Department of Health Laboratories Administration et al		MW310422.1
USA/MI-MDHHS-SC22236/2020	GH		20C	USA	USA	Michigan	Michigan	EPI_ISL_666902	Human	Michigan Department of Health and Human Services, Bureau of Laboratories	B.1.2	3-7 days ago	North America		Michigan Department of Health and Human Services, Bureau of Laboratories		2020-11-04	Blankenship HM et al
USA/MN-MDH-2044/2020	GH		20C	USA	USA	Minnesota	Minnesota	EPI_ISL_654725	Human	Minnesota Department of Health, Public Health Laboratory	B.1.2	One week ago	North America		Minnesota Department of Health, Public Health Laboratory		2020-11-04	Matt Plumb et al		MW288281.1
USA/MI-MDHHS-SC22296/2020	GH		20C	USA	USA	Michigan	Michigan	EPI_ISL_666962	Human	Michigan Department of Health and Human Services, Bureau of Laboratories	B.1.2	3-7 days ago	North America		Michigan Department of Health and Human Services, Bureau of Laboratories		2020-11-04	Blankenship HM et al
USA/IA-GMF-31421/2020	GH		20C	USA	USA	Iowa	Iowa	EPI_ISL_661089	Human	Gundersen Molecular Diagnostics Laboratory	B.1.2	One week ago	North America		Kabara Cancer Research Institute		2020-11-04	Craig S. Richmond et al A	Allamakee County
USA/OR-OHSU-4500/2020	GH	39	20C	USA	USA	Oregon	Oregon	EPI_ISL_667543	Human	OHSU Lab Services Molecular Microbiology Lab	B.1.3	3-7 days ago	North America	Male	Oregon SARS-CoV-2 Genome Sequencing Center		2020-11-05	Brendan L. O'Connell et al
USA/MD-MDH-0408/2020	GH		20C	USA	USA	Maryland	Maryland	EPI_ISL_666778	Human	Maryland Public Health Laboratory	B.1	3-7 days ago	North America		Maryland Public Health Laboratory		2020-11-05	Maryland Department of Health Laboratories Administration et al		MW310420.1
USA/MN-GMF-31559/2020	GH		20C	USA	USA	Minnesota	Minnesota	EPI_ISL_661096	Human	Gundersen Molecular Diagnostics Laboratory	B.1.2	One week ago	North America		Kabara Cancer Research Institute		2020-11-05	Craig S. Richmond et al A	Houston County
USA/IA-GMF-31654/2020	GH		20C	USA	USA	Iowa	Iowa	EPI_ISL_661107	Human	Gundersen Molecular Diagnostics Laboratory	B.1.2	One week ago	North America		Kabara Cancer Research Institute		2020-11-05	Craig S. Richmond et al A	Allamakee County
USA/WI-GMF-31893/2020	GH		20C	USA	USA	Wisconsin	Wisconsin	EPI_ISL_661118	Human	Gundersen Molecular Diagnostics Laboratory	B.1.3	One week ago	North America		Kabara Cancer Research Institute		2020-11-06	Craig S. Richmond et al A	La Crosse County
USA/VA-DCLS-2169/2020	GH		20C	USA	USA	Virginia	Virginia	EPI_ISL_677198	Human	Virginia Division of Consolidated Laboratory Services	B.1.2	3-7 days ago	North America		Virginia Division of Consolidated Laboratory Services		2020-11-06	Virginia DCLS et al
USA/VA-DCLS-2171/2020	GH		20C	USA	USA	Virginia	Virginia	EPI_ISL_677200	Human	Virginia Division of Consolidated Laboratory Services	B.1.2	3-7 days ago	North America		Virginia Division of Consolidated Laboratory Services		2020-11-06	Virginia DCLS et al
USA/IA-GMF-32164/2020	GH		20C	USA	USA	Iowa	Iowa	EPI_ISL_661128	Human	Gundersen Molecular Diagnostics Laboratory	B.1.2	One week ago	North America		Kabara Cancer Research Institute		2020-11-07	Craig S. Richmond et al A	Allamakee County
USA/OR-OHSU-4663/2020	GH	29	20C	USA	USA	Oregon	Oregon	EPI_ISL_667544	Human	OHSU Lab Services Molecular Microbiology Lab	B.1.3	3-7 days ago	North America	Male	Oregon SARS-CoV-2 Genome Sequencing Center		2020-11-09	Brendan L. O'Connell et al
USA/OR-OHSU-4584/2020	GH	26	20C	USA	USA	Oregon	Oregon	EPI_ISL_667538	Human	OHSU Lab Services Molecular Microbiology Lab	B.1.3	3-7 days ago	North America	Female	Oregon SARS-CoV-2 Genome Sequencing Center		2020-11-09	Brendan L. O'Connell et al
USA/VA-DCLS-2180/2020	GH		20C	USA	USA	Virginia	Virginia	EPI_ISL_677206	Human	Virginia Division of Consolidated Laboratory Services	B.1.2	3-7 days ago	North America		Virginia Division of Consolidated Laboratory Services		2020-11-09	Virginia DCLS et al
USA/VA-DCLS-2177/2020	GH		20C	USA	USA	Virginia	Virginia	EPI_ISL_677204	Human	Virginia Division of Consolidated Laboratory Services	B.1.2	3-7 days ago	North America		Virginia Division of Consolidated Laboratory Services		2020-11-09	Virginia DCLS et al
USA/VA-DCLS-2184/2020	GH		20C	USA	USA	Virginia	Virginia	EPI_ISL_677210	Human	Virginia Division of Consolidated Laboratory Services	B.1.2	3-7 days ago	North America		Virginia Division of Consolidated Laboratory Services		2020-11-09	Virginia DCLS et al
USA/MD-MDH-0433/2020	GH		20C	USA	USA	Maryland	Maryland	EPI_ISL_666801	Human	Maryland Public Health Laboratory	B.1.2	3-7 days ago	North America		Maryland Public Health Laboratory		2020-11-10	Maryland Department of Health Laboratories Administration et al		MW310443.1
USA/IA-GMF-32907/2020	GH		20C	USA	USA	Iowa	Iowa	EPI_ISL_661169	Human	Gundersen Molecular Diagnostics Laboratory	B.1.2	One week ago	North America		Kabara Cancer Research Institute		2020-11-10	Craig S. Richmond et al A	Allamakee County
USA/VA-DCLS-2190/2020	GH		20C	USA	USA	Virginia	Virginia	EPI_ISL_677214	Human	Virginia Division of Consolidated Laboratory Services	B.1.2	3-7 days ago	North America		Virginia Division of Consolidated Laboratory Services		2020-11-12	Virginia DCLS et al
Australia/QLD1161/2020	GH		20C	Australia	Australia	Australia	Australia	EPI_ISL_641310	Human		B.1.2	One month ago	Oceania		Public Health Virology Laboratory, Forensic and Scientific Services (PHV-FSS)		2020-04-01	Son Nguyen et al. et al
Australia/WA413/2020	GH		20C	Australia	Australia	Western Australia	Western Australia	EPI_ISL_672625	Human	PathWest Laboratory Medicine WA	B.1	3-7 days ago	Oceania		PathWest Laboratory Medicine WA Microbial Surveillance Unit		2020-05-27	PathWest Laboratory Medicine WA Microbial Surveillance Unit et al
Australia/WA426/2020	GH		20C	Australia	Australia	Western Australia	Western Australia	EPI_ISL_672638	Human	PathWest Laboratory Medicine WA	B.1	3-7 days ago	Oceania		PathWest Laboratory Medicine WA Microbial Surveillance Unit		2020-09-18	PathWest Laboratory Medicine WA Microbial Surveillance Unit et al
Australia/WA427/2020	GH		20C	Australia	Australia	Western Australia	Western Australia	EPI_ISL_672639	Human	PathWest Laboratory Medicine WA	B.1	3-7 days ago	Oceania		PathWest Laboratory Medicine WA Microbial Surveillance Unit		2020-09-20	PathWest Laboratory Medicine WA Microbial Surveillance Unit et al
Australia/NSW2910/2020	GH	72	20A	Australia	Australia	New South Wales	New South Wales	EPI_ISL_678366	Human	Area of Virology, Serology and Virology Division (SAViD), New South Wales Health Pathology Randwick	B.1.36	1-2 days ago	Oceania	Female	Virology Research Laboratory; Area of Virology, Serology and Virology Division (SAViD), New South Wales Health Pathology Randwick		2020-10-11	Foster et al	Sydney
NewZealand/20CV0536/2020	GH		20A	New Zealand	New Zealand	Bay of Plenty	Bay of Plenty	EPI_ISL_637088	Human	PathLab Bay of Plenty	B.1	One month ago	Oceania	Female	Institute of Environmental Science and Research (ESR)		2020-10-16	Xiaoyun Ren et al
Australia/QLD1229/2020	GH		20C	Australia	Australia	Australia	Australia	EPI_ISL_639818	Human		B.1	One month ago	Oceania		Public Health Virology Laboratory, Forensic and Scientific Services (PHV-FSS)		2020-10-19	Son Nguyen et al. et al
Australia/QLD1147/2020	GH		20A	Australia	Australia	Australia	Australia	EPI_ISL_639750	Human		B.1	One month ago	Oceania		Public Health Virology Laboratory, Forensic and Scientific Services (PHV-FSS)		2020-10-21	Son Nguyen et al. et al
Australia/NSW1191/2020	GH		20A	Australia	Australia	New South Wales	New South Wales	EPI_ISL_671673	Human	South Eastern Area Laboratory Services (SEALS)	B.1.36	3-7 days ago	Oceania		NSW Health Pathology - Institute of Clinical Pathology and Medical Research; Westmead Hospital; University of Sydney		2020-10-21	CIDM-PH et al. et al	Sydney
Australia/NSW2953/2020	GH	32	20A	Australia	Australia	New South Wales	New South Wales	EPI_ISL_678379	Human	Area of Virology, Serology and Virology Division (SAViD), New South Wales Health Pathology Randwick	B.1.160	1-2 days ago	Oceania	Male	Virology Research Laboratory; Area of Virology, Serology and Virology Division (SAViD), New South Wales Health Pathology Randwick		2020-10-26	Foster et al	Sydney
Australia/NSW1195/2020	GH		20A	Australia	Australia	New South Wales	New South Wales	EPI_ISL_667795	Human	South Eastern Area Laboratory Services (SEALS)	B.1.160	3-7 days ago	Oceania		NSW Health Pathology - Institute of Clinical Pathology and Medical Research; Westmead Hospital; University of Sydney		2020-10-30	CIDM-PH et al. et al	Sydney
NewZealand/20CV0531/2020	GH		20A	New Zealand	New Zealand	Auckland	Auckland	EPI_ISL_637086	Human	Middlemore Hospital	B.1.36	One month ago	Oceania	Female	Institute of Environmental Science and Research (ESR)		2020-11-03	Xiaoyun Ren et al
NewZealand/20CV0524/2020	GH		20A	New Zealand	New Zealand	Auckland	Auckland	EPI_ISL_637084	Human	LabTests	B.1.36	One month ago	Oceania	Male	Institute of Environmental Science and Research (ESR)		2020-11-05	Xiaoyun Ren et al
Australia/NSW1203/2020	GH		20C	Australia	Australia	New South Wales	New South Wales	EPI_ISL_667802	Human	South Eastern Area Laboratory Services (SEALS)	B.1.2	3-7 days ago	Oceania		NSW Health Pathology - Institute of Clinical Pathology and Medical Research; Westmead Hospital; University of Sydney		2020-11-06	CIDM-PH et al. et al	Sydney
Australia/NSW1200/2020	GH		20A	Australia	Australia	New South Wales	New South Wales	EPI_ISL_667800	Human	South Eastern Area Laboratory Services (SEALS)	B.1.160	3-7 days ago	Oceania		NSW Health Pathology - Institute of Clinical Pathology and Medical Research; Westmead Hospital; University of Sydney		2020-11-07	CIDM-PH et al. et al	Sydney
Australia/NSW1207/2020	GH		20A	Australia	Australia	New South Wales	New South Wales	EPI_ISL_667805	Human	South Eastern Area Laboratory Services (SEALS)	B.1.36.1	3-7 days ago	Oceania		NSW Health Pathology - Institute of Clinical Pathology and Medical Research; Westmead Hospital; University of Sydney		2020-11-07	CIDM-PH et al. et al	Sydney
NewZealand/20CV0527/2020	GH		20A	New Zealand	New Zealand	Wellington	Wellington	EPI_ISL_637085	Human	Wellington SCL (WN)	B.1.36	One month ago	Oceania	Female	Institute of Environmental Science and Research (ESR)		2020-11-08	Xiaoyun Ren et al
NewZealand/20CV0545/2020	GH		20A	New Zealand	New Zealand	Auckland	Auckland	EPI_ISL_637096	Human	LabTests	B.1.36	One month ago	Oceania	Female	Institute of Environmental Science and Research (ESR)		2020-11-10	Xiaoyun Ren et al
NewZealand/20CV0556/2020	GH		20A	New Zealand	New Zealand	Wellington	Wellington	EPI_ISL_649123	Human	Wellington SCL (WN)	B.1.36	One month ago	Oceania	Female	Institute of Environmental Science and Research (ESR)		2020-11-11	Xiaoyun Ren et al
Australia/NSW1216/2020	GH		20A	Australia	Australia	New South Wales	New South Wales	EPI_ISL_672660	Human	South Eastern Area Laboratory Services (SEALS)	B.1.36.1	3-7 days ago	Oceania		NSW Health Pathology - Institute of Clinical Pathology and Medical Research; Westmead Hospital; University of Sydney		2020-11-14	CIDM-PH et al. et al	Sydney
Australia/SAP548/2020	GH	81	20A	Australia	Australia	South Australia	South Australia	EPI_ISL_654795	Human	SA Pathology	B.1.36	One week ago	Oceania	Female	SA Pathology		2020-11-14	Lex Leong et al
Australia/SAP566/2020	GH		20A	Australia	Australia	South Australia	South Australia	EPI_ISL_654809	Human	SA Pathology	B.1.36	One week ago	Oceania		SA Pathology		2020-11-16	Lex Leong et al
Australia/SAP559/2020	GH		20A	Australia	Australia	South Australia	South Australia	EPI_ISL_654802	Human	SA Pathology	B.1.36	One week ago	Oceania		SA Pathology		2020-11-16	Lex Leong et al
Australia/SAP565/2020	GH		20A	Australia	Australia	South Australia	South Australia	EPI_ISL_654808	Human	SA Pathology	B.1.36	One week ago	Oceania		SA Pathology		2020-11-16	Lex Leong et al
Australia/SAP561/2020	GH		20A	Australia	Australia	South Australia	South Australia	EPI_ISL_654804	Human	SA Pathology	B.1.36	One week ago	Oceania		SA Pathology		2020-11-16	Lex Leong et al
Australia/SAP553/2020	GH	60	20A	Australia	Australia	South Australia	South Australia	EPI_ISL_654799	Human	SA Pathology	B.1.36	One week ago	Oceania	Male	SA Pathology		2020-11-16	Lex Leong et al
Australia/SAP558/2020	GH		20A	Australia	Australia	South Australia	South Australia	EPI_ISL_654801	Human	SA Pathology	B.1.36	One week ago	Oceania		SA Pathology		2020-11-16	Lex Leong et al
Australia/SAP564/2020	GH		20A	Australia	Australia	South Australia	South Australia	EPI_ISL_654807	Human	SA Pathology	B.1.36	One week ago	Oceania		SA Pathology		2020-11-16	Lex Leong et al
Australia/SAP560/2020	GH		20A	Australia	Australia	South Australia	South Australia	EPI_ISL_654803	Human	SA Pathology	B.1.36	One week ago	Oceania		SA Pathology		2020-11-16	Lex Leong et al
Australia/SAP556/2020	GH	23	20A	Australia	Australia	South Australia	South Australia	EPI_ISL_654800	Human	SA Pathology	B.1.36	One week ago	Oceania	Male	SA Pathology		2020-11-16	Lex Leong et al
Australia/NSW1215/2020	GH		20A	Australia	Australia	New South Wales	New South Wales	EPI_ISL_672659	Human	South Eastern Area Laboratory Services (SEALS)	B.1.36.1	3-7 days ago	Oceania		NSW Health Pathology - Institute of Clinical Pathology and Medical Research; Westmead Hospital; University of Sydney		2020-11-17	CIDM-PH et al. et al	Sydney
NewZealand/20CV0563/2020	GH		20A	New Zealand	New Zealand	Wellington	Wellington	EPI_ISL_649125	Human	Wellington SCL (WN)	B.1.36	One month ago	Oceania	Female	Institute of Environmental Science and Research (ESR)		2020-11-18	Xiaoyun Ren et al
Australia/NSW1212/2020	GH		20A	Australia	Australia	New South Wales	New South Wales	EPI_ISL_672656	Human	South Eastern Area Laboratory Services (SEALS)	B.1.36	3-7 days ago	Oceania		NSW Health Pathology - Institute of Clinical Pathology and Medical Research; Westmead Hospital; University of Sydney		2020-11-19	CIDM-PH et al. et al	Sydney
Australia/NSW1213/2020	GH		20A	Australia	Australia	New South Wales	New South Wales	EPI_ISL_672657	Human	South Eastern Area Laboratory Services (SEALS)	B.1.36	3-7 days ago	Oceania		NSW Health Pathology - Institute of Clinical Pathology and Medical Research; Westmead Hospital; University of Sydney		2020-11-19	CIDM-PH et al. et al	Sydney
NewZealand/20CV0594/2020	GH		20A	New Zealand	New Zealand	Auckland	Auckland	EPI_ISL_661264	Human	LabPLUS	B.1.36.1	One week ago	Oceania	Male	Institute of Environmental Science and Research (ESR)		2020-11-20	Xiaoyun Ren et al
NewZealand/20CV0576/2020	GH		20C	New Zealand	New Zealand	Canterbury	Canterbury	EPI_ISL_661260	Human	Canterbury Health Laboratories	B.1.2	One week ago	Oceania	Male	Institute of Environmental Science and Research (ESR)		2020-11-20	Xiaoyun Ren et al
Colombia/ATL-INS-01/2020	GH	79	20A	Colombia	Colombia	Atlantico	Atlantico	EPI_ISL_653761	Human	Instituto Nacional de Salud, Bogot√°, Colombia	B.1	One month ago	South America	Male	Instituto Nacional de Salud, Bogot√°, Colombia		2020-06-08	Katherine Laiton-Donato et al A	Barranquilla
Colombia/ANT-INS-01/2020	GH	26	20A	Colombia	Colombia	Antioquia	Antioquia	EPI_ISL_653756	Human	Instituto Nacional de Salud, Bogot√°, Colombia	B.1	One month ago	South America	Female	Instituto Nacional de Salud, Bogot√°, Colombia		2020-07-07	Katherine Laiton-Donato et al A	Medellin
Colombia/ANT-INS-5/2020	GH	21	20A	Colombia	Colombia	Antioquia	Antioquia	EPI_ISL_653758	Human	Instituto Nacional de Salud, Bogot√°, Colombia	B.1	One month ago	South America	Female	Instituto Nacional de Salud, Bogot√°, Colombia		2020-08-26	Katherine Laiton-Donato et al A	Medellin
SouthAfrica/NHLS-UCT-GS-0045/2020	GR	33	20B	South Africa	South Africa	Western Cape Province	Western Cape Province	EPI_ISL_640051	Human	Groote Schuur Hospital wc GSH	B.1.1.35	One month ago	Africa	Female	NHLS/UCT		2020-03-22	Arash Iranzadeh et al
SouthAfrica/NHLS-UCT-GP-5223/2020	GR	47	20B	South Africa	South Africa	Western Cape Province	Western Cape Province	EPI_ISL_640102	Human	Vanguard CHC wc VGC	B.1.1	One month ago	Africa	Female	NHLS/UCT		2020-04-29	Arash Iranzadeh et al	Klipfontein
Zimbabwe/ZW-6970/2020	GR	39	20B	Zimbabwe	Zimbabwe	Zimbabwe	Zimbabwe	EPI_ISL_647980	Human	National Microbiology Reference Laboratory	B.1.1	One month ago	Africa	Female	Quadram Institute Bioscience		2020-05-01	Thanh Le Viet et al
BurkinaFaso/608/2020	GR	25	20B	Burkina Faso	Burkina Faso	Sud-Ouest	Sud-Ouest	EPI_ISL_660477	Human	Laboratoire de Microbiologie CHU Souro Sanou	B.1.1	One week ago	Africa	Male	Centre Muraz		2020-06-21	Abdoul-Salam Ouedraogo et al	Bati√©
Ghana/UHAS-K674/2020	GR	16	20B	Ghana	Ghana	Volta	Volta	EPI_ISL_628760	Human	UHAS COVID-19 Lab	B.1.1	One month ago	Africa	Male	UHAS COVID-19 Lab		2020-07-07	Kwabena O. Duedu et al
Mozambique/KRISP-MZ157470/2020	GR	28	20B	Mozambique	Mozambique	Cabo Delgado	Cabo Delgado	EPI_ISL_636978	Human	HP Pemba	B.1.1.54	One month ago	Africa	Male	KRISP, KZN Research Innovation and Sequencing Platform		2020-07-11	Ismael N et al	Pemba
BurkinaFaso/1124/2020	GR	51	20B	Burkina Faso	Burkina Faso	Sud-Ouest	Sud-Ouest	EPI_ISL_660446	Human	Laboratoire de Microbiologie CHU Souro Sanou	B.1.1	One week ago	Africa	Male	Centre Muraz		2020-07-21	Abdoul-Salam Ouedraogo et al	Gaoua
SouthAfrica/NHLS-UCT-GS-0021/2020	GR	30	20B	South Africa	South Africa	Western Cape Province	Western Cape Province	EPI_ISL_640022	Human	Knysna Hospital wc KNY	B.1.1	One month ago	Africa	Male	NHLS/UCT		2020-08-11	Arash Iranzadeh et al	Knysna
SouthAfrica/NHLS-UCT-GS-0016/2020	GR	38	20B	South Africa	South Africa	Northern Cape	Northern Cape	EPI_ISL_640018	Human	Heidelberg Clinic wc HBC	B.1.1	One month ago	Africa	Female	NHLS/UCT		2020-08-11	Arash Iranzadeh et al
BurkinaFaso/2-041-1649/2020	GR	28	20B	Burkina Faso	Burkina Faso	Hauts-Bassins	Hauts-Bassins	EPI_ISL_660492	Human	Laboratoire de Microbiologie CHU Souro Sanou	B.1.1	One week ago	Africa	Female	Centre Muraz		2020-08-13	Abdoul-Salam Ouedraogo et al	Hound√©
BurkinaFaso/2-042-1650/2020	GR	46	20B	Burkina Faso	Burkina Faso	Hauts-Bassins	Hauts-Bassins	EPI_ISL_660493	Human	Laboratoire de Microbiologie CHU Souro Sanou	B.1.1	One week ago	Africa	Female	Centre Muraz		2020-08-13	Abdoul-Salam Ouedraogo et al	Hound√©
SouthAfrica/NHLS-UCT-GS-0030/2020	GR	35	20B	South Africa	South Africa	Western Cape Province	Western Cape Province	EPI_ISL_640031	Human	Beaufort West Hospital wc BWH	B.1.1	One month ago	Africa	Male	NHLS/UCT		2020-08-19	Arash Iranzadeh et al	Beaufort West
SouthAfrica/NHLS-UCT-GS-0036/2020	GR	29	20B	South Africa	South Africa	Western Cape Province	Western Cape Province	EPI_ISL_640037	Human	Valkenberg Hospital wc VBH	B.1.1	One month ago	Africa	Female	NHLS/UCT		2020-08-22	Arash Iranzadeh et al
SouthAfrica/NHLS-UCT-GS-1990/2020	GR	83	20B	South Africa	South Africa	Western Cape Province	Western Cape Province	EPI_ISL_640049	Human	George Road Sat Clinic wc GWM	B.1.1.40	One month ago	Africa	Male	NHLS/UCT		2020-08-25	Arash Iranzadeh et al	George
SouthAfrica/NHLS-UCT-GS-1947/2020	GR	36	20B	South Africa	South Africa	Western Cape Province	Western Cape Province	EPI_ISL_640046	Human	Valkenberg Hospital wc VBH	B.1.1	One month ago	Africa	Female	NHLS/UCT		2020-08-29	Arash Iranzadeh et al
SouthAfrica/NHLS-UCT-GS-1779/2020	GR	49	20B	South Africa	South Africa	Western Cape Province	Western Cape Province	EPI_ISL_640112	Human	Groote Schuur Hospital wc GSH	B.1.1	One month ago	Africa	Female	NHLS/UCT		2020-09-04	Arash Iranzadeh et al
SouthAfrica/NHLS-UCT-GS-1777/2020	GR	30	20B	South Africa	South Africa	Western Cape Province	Western Cape Province	EPI_ISL_640111	Human	Groote Schuur Hospital wc GSH	B.1.1.40	One month ago	Africa	Female	NHLS/UCT		2020-09-04	Arash Iranzadeh et al
BurkinaFaso/2-068-2228/2020	GR	70	20B	Burkina Faso	Burkina Faso	Hauts-Bassins	Hauts-Bassins	EPI_ISL_660457	Human	Laboratoire de Microbiologie CHU Souro Sanou	B.1.1	One week ago	Africa	Male	Centre Muraz		2020-09-06	Abdoul-Salam Ouedraogo et al	Bobo Dioulasso
BurkinaFaso/2550/2020	GR	35	20B	Burkina Faso	Burkina Faso	Hauts-Bassins	Hauts-Bassins	EPI_ISL_660498	Human	Laboratoire de Microbiologie CHU Souro Sanou	B.1.1	One week ago	Africa	Male	Centre Muraz		2020-09-13	Abdoul-Salam Ouedraogo et al	Bobo Dioulasso
BurkinaFaso/2551/2020	GR	59	20B	Burkina Faso	Burkina Faso	Hauts-Bassins	Hauts-Bassins	EPI_ISL_660525	Human	Laboratoire de Microbiologie CHU Souro Sanou	B.1.1	One week ago	Africa	Female	Centre Muraz		2020-09-13	Abdoul-Salam Ouedraogo et al	Bobo Dioulasso
BurkinaFaso/2667/2020	GR	36	20B	Burkina Faso	Burkina Faso	Hauts-Bassins	Hauts-Bassins	EPI_ISL_660494	Human	Laboratoire de Microbiologie CHU Souro Sanou	B.1.1	One week ago	Africa	Male	Centre Muraz		2020-09-16	Abdoul-Salam Ouedraogo et al	Bobo Dioulasso
Madagascar/VIRO-33698/2020	GR	52	20B	Madagascar	Madagascar	Analamanga	Analamanga	EPI_ISL_677634	Human	Virology Unit, Institut Pasteur de Madagascar	B.1.1.55	3-7 days ago	Africa	Male	Virology Unit, Institut Pasteur de Madagascar		2020-09-16	Christian Ranaivoson et al	Antananarivo
BurkinaFaso/2799/2020	GR	17	20B	Burkina Faso	Burkina Faso	Hauts-Bassins	Hauts-Bassins	EPI_ISL_660462	Human	Laboratoire de Microbiologie CHU Souro Sanou	B.1.1	One week ago	Africa	Female	Centre Muraz		2020-09-17	Abdoul-Salam Ouedraogo et al	Bobo Dioulasso
BurkinaFaso/2832/2020	GR	22	20B	Burkina Faso	Burkina Faso	Hauts-Bassins	Hauts-Bassins	EPI_ISL_660463	Human	Laboratoire de Microbiologie CHU Souro Sanou	B.1.1	One week ago	Africa	Female	Centre Muraz		2020-09-17	Abdoul-Salam Ouedraogo et al	Hound√©
SouthAfrica/NHLS-UCT-GS-2081/2020	GR	35	20B	South Africa	South Africa	Western Cape Province	Western Cape Province	EPI_ISL_640078	Human	2 Military Hospital wc MAA	B.1.1.57	One month ago	Africa	Female	NHLS/UCT		2020-09-22	Arash Iranzadeh et al
SouthAfrica/NHLS-UCT-GS-2085/2020	GR	54	20B	South Africa	South Africa	Western Cape Province	Western Cape Province	EPI_ISL_640128	Human	Groote Schuur Hospital wc GSH	B.1.1	One month ago	Africa	Male	NHLS/UCT		2020-09-23	Arash Iranzadeh et al
BurkinaFaso/2972/2020	GR	10	20B	Burkina Faso	Burkina Faso	Hauts-Bassins	Hauts-Bassins	EPI_ISL_660465	Human	Laboratoire de Microbiologie CHU Souro Sanou	B.1.1	One week ago	Africa	Female	Centre Muraz		2020-09-24	Abdoul-Salam Ouedraogo et al	Bobo Dioulasso
BurkinaFaso/3069/2020	GR	30	20B	Burkina Faso	Burkina Faso	Hauts-Bassins	Hauts-Bassins	EPI_ISL_660504	Human	Laboratoire de Microbiologie CHU Souro Sanou	B.1.1	One week ago	Africa	Female	Centre Muraz		2020-09-25	Abdoul-Salam Ouedraogo et al	Bobo Dioulasso
SouthAfrica/KRISP-K004007/2020	GR	39	20B	South Africa	South Africa	KwaZulu-Natal	KwaZulu-Natal	EPI_ISL_634992	Human	National Health Laboratory Service - Inkosi Albert Luthuli Central Hospital (NHLS-IALCH)	B.1.1	One month ago	Africa	Male	KRISP, KZN Research Innovation and Sequencing Platform		2020-09-27	Giandhari J et al A	eThekwini
BurkinaFaso/3103/2020	GR	47	20B	Burkina Faso	Burkina Faso	Hauts-Bassins	Hauts-Bassins	EPI_ISL_660467	Human	Laboratoire de Microbiologie CHU Souro Sanou	B.1.1	One week ago	Africa	Male	Centre Muraz		2020-09-28	Abdoul-Salam Ouedraogo et al	Bobo Dioulasso
SouthAfrica/KRISP-K004003/2020	GR	84	20B	South Africa	South Africa	KwaZulu-Natal	KwaZulu-Natal	EPI_ISL_634988	Human	National Health Laboratory Service - Inkosi Albert Luthuli Central Hospital (NHLS-IALCH)	B.1.1.54	One month ago	Africa	Male	KRISP, KZN Research Innovation and Sequencing Platform		2020-09-28	Giandhari J et al A	uMkhanyakude
SouthAfrica/KRISP-K003996/2020	GR	25	20B	South Africa	South Africa	KwaZulu-Natal	KwaZulu-Natal	EPI_ISL_634984	Human	National Health Laboratory Service - Inkosi Albert Luthuli Central Hospital (NHLS-IALCH)	B.1.1.10	One month ago	Africa	Female	KRISP, KZN Research Innovation and Sequencing Platform		2020-09-28	Giandhari J et al A	iLembe
SouthAfrica/KRISP-K004004/2020	GR	56	20B	South Africa	South Africa	KwaZulu-Natal	KwaZulu-Natal	EPI_ISL_634989	Human	National Health Laboratory Service - Inkosi Albert Luthuli Central Hospital (NHLS-IALCH)	B.1.1.66	One month ago	Africa	Female	KRISP, KZN Research Innovation and Sequencing Platform		2020-09-28	Giandhari J et al A	uMkhanyakude
SouthAfrica/KRISP-K004005/2020	GR	41	20B	South Africa	South Africa	KwaZulu-Natal	KwaZulu-Natal	EPI_ISL_634990	Human	National Health Laboratory Service - Inkosi Albert Luthuli Central Hospital (NHLS-IALCH)	B.1.1	One month ago	Africa	Female	KRISP, KZN Research Innovation and Sequencing Platform		2020-09-29	Giandhari J et al A	eThekwini
SouthAfrica/Tygerberg_335_CC2/2020	GR		20B	South Africa	South Africa	Western Cape Province	Western Cape Province	EPI_ISL_660142	Human	Hamadi	C.1	One week ago	Africa	Female	National Health Laboratory Service (NHLS), Tygerberg		2020-10-09	Susan Engelbrecht et al	Cape Town
SouthAfrica/Tygerberg_345_CC2/2020	GR	19	20B	South Africa	South Africa	Western Cape Province	Western Cape Province	EPI_ISL_660149	Human	PathCare	C.1	One week ago	Africa	Female	National Health Laboratory Service (NHLS), Tygerberg		2020-10-09	Susan Engelbrecht et al	Cape Town
SouthAfrica/Tygerberg_317_CC2/2020	GR	19	20B	South Africa	South Africa	Western Cape Province	Western Cape Province	EPI_ISL_660126	Human	Ampath	C.1	One week ago	Africa	Male	National Health Laboratory Service (NHLS), Tygerberg		2020-10-09	Susan Engelbrecht et al	Cape Town
SouthAfrica/Tygerberg_325_CC2/2020	GR	18	20B	South Africa	South Africa	Western Cape Province	Western Cape Province	EPI_ISL_660133	Human	Lancet	C.1	One week ago	Africa	Male	National Health Laboratory Service (NHLS), Tygerberg		2020-10-09	Susan Engelbrecht et al	Cape Town
SouthAfrica/Tygerberg_348_CC2/2020	GR	22	20B	South Africa	South Africa	Western Cape Province	Western Cape Province	EPI_ISL_660151	Human	PathCare	B.1.1	One week ago	Africa	Female	National Health Laboratory Service (NHLS), Tygerberg		2020-10-09	Susan Engelbrecht et al	Cape Town
SouthAfrica/KRISP-K004029/2020	GR	52	20B	South Africa	South Africa	KwaZulu-Natal	KwaZulu-Natal	EPI_ISL_635010	Human	National Health Laboratory Service - Inkosi Albert Luthuli Central Hospital (NHLS-IALCH)	B.1.1.56	One month ago	Africa	Female	KRISP, KZN Research Innovation and Sequencing Platform		2020-10-09	Giandhari J et al A	iLembe
SouthAfrica/NHLS-UCT-GS-3515/2020	GR	25	20B	South Africa	South Africa	Western Cape Province	Western Cape Province	EPI_ISL_640138	Human	Groote Schuur Hospital wc GSH	B.1.1	One month ago	Africa	Male	NHLS/UCT		2020-10-09	Arash Iranzadeh et al
SouthAfrica/KRISP-K004022/2020	GR	34	20B	South Africa	South Africa	KwaZulu-Natal	KwaZulu-Natal	EPI_ISL_635005	Human	National Health Laboratory Service - Inkosi Albert Luthuli Central Hospital (NHLS-IALCH)	B.1.1.54	One month ago	Africa	Male	KRISP, KZN Research Innovation and Sequencing Platform		2020-10-09	Giandhari J et al A	uMkhanyakude
SouthAfrica/Tygerberg_366_CC2/2020	GR	19	20B	South Africa	South Africa	Western Cape Province	Western Cape Province	EPI_ISL_660158	Human	PathCare	C.1	One week ago	Africa	Female	National Health Laboratory Service (NHLS), Tygerberg		2020-10-10	Susan Engelbrecht et al	Cape Town
SouthAfrica/KRISP-K004013/2020	GR	34	20B	South Africa	South Africa	KwaZulu-Natal	KwaZulu-Natal	EPI_ISL_634998	Human	National Health Laboratory Service - Inkosi Albert Luthuli Central Hospital (NHLS-IALCH)	B.1.1	One month ago	Africa	Female	KRISP, KZN Research Innovation and Sequencing Platform		2020-10-10	Giandhari J et al A	Zululand
SouthAfrica/NHLS-UCT-GS-3519/2020	GR	68	20B	South Africa	South Africa	Western Cape Province	Western Cape Province	EPI_ISL_640140	Human	Groote Schuur Hospital wc GSH	B.1.1	One month ago	Africa	Female	NHLS/UCT		2020-10-10	Arash Iranzadeh et al
SouthAfrica/KRISP-K004015/2020	GR	91	20A	South Africa	South Africa	KwaZulu-Natal	KwaZulu-Natal	EPI_ISL_635000	Human	National Health Laboratory Service - Inkosi Albert Luthuli Central Hospital (NHLS-IALCH)	B.1.1.54	One month ago	Africa	Female	KRISP, KZN Research Innovation and Sequencing Platform		2020-10-12	Giandhari J et al A	uMkhanyakude
SouthAfrica/KRISP-K004008/2020	GR	7	20A	South Africa	South Africa	KwaZulu-Natal	KwaZulu-Natal	EPI_ISL_634993	Human	National Health Laboratory Service - Inkosi Albert Luthuli Central Hospital (NHLS-IALCH)	B.1.1.25	One month ago	Africa	Female	KRISP, KZN Research Innovation and Sequencing Platform		2020-10-12	Giandhari J et al A	iLembe
SouthAfrica/KRISP-K004031/2020	GR	12	20B	South Africa	South Africa	KwaZulu-Natal	KwaZulu-Natal	EPI_ISL_635012	Human	National Health Laboratory Service - Inkosi Albert Luthuli Central Hospital (NHLS-IALCH)	B.1.1.46	One month ago	Africa	Female	KRISP, KZN Research Innovation and Sequencing Platform		2020-10-12	Giandhari J et al A	Ugu
SouthAfrica/KRISP-K004030/2020	GR	35	20B	South Africa	South Africa	KwaZulu-Natal	KwaZulu-Natal	EPI_ISL_635011	Human	National Health Laboratory Service - Inkosi Albert Luthuli Central Hospital (NHLS-IALCH)	B.1.1.46	One month ago	Africa		KRISP, KZN Research Innovation and Sequencing Platform		2020-10-12	Giandhari J et al A	Ugu
SouthAfrica/KRISP-K004011/2020	GR	28	20B	South Africa	South Africa	KwaZulu-Natal	KwaZulu-Natal	EPI_ISL_634996	Human	National Health Laboratory Service - Inkosi Albert Luthuli Central Hospital (NHLS-IALCH)	B.1.1.10	One month ago	Africa	Male	KRISP, KZN Research Innovation and Sequencing Platform		2020-10-12	Giandhari J et al A	iLembe
SouthAfrica/KRISP-K004018/2020	GR	34	20B	South Africa	South Africa	KwaZulu-Natal	KwaZulu-Natal	EPI_ISL_635002	Human	National Health Laboratory Service - Inkosi Albert Luthuli Central Hospital (NHLS-IALCH)	B.1.1.10	One month ago	Africa	Female	KRISP, KZN Research Innovation and Sequencing Platform		2020-10-12	Giandhari J et al A	iLembe
SouthAfrica/KRISP-K004021/2020	GR	28	20B	South Africa	South Africa	KwaZulu-Natal	KwaZulu-Natal	EPI_ISL_635004	Human	National Health Laboratory Service - Inkosi Albert Luthuli Central Hospital (NHLS-IALCH)	B.1.1.56	One month ago	Africa	Female	KRISP, KZN Research Innovation and Sequencing Platform		2020-10-13	Giandhari J et al A	Harry Gwala
SouthAfrica/KRISP-K004017/2020	GR	47	20B	South Africa	South Africa	KwaZulu-Natal	KwaZulu-Natal	EPI_ISL_635001	Human	National Health Laboratory Service - Inkosi Albert Luthuli Central Hospital (NHLS-IALCH)	C.1	One month ago	Africa	Female	KRISP, KZN Research Innovation and Sequencing Platform		2020-10-14	Giandhari J et al A	uMkhanyakude
SouthAfrica/KRISP-K004038/2020	GR	25	20B	South Africa	South Africa	KwaZulu-Natal	KwaZulu-Natal	EPI_ISL_635019	Human	National Health Laboratory Service - Inkosi Albert Luthuli Central Hospital (NHLS-IALCH)	B.1.1	One month ago	Africa	Male	KRISP, KZN Research Innovation and Sequencing Platform		2020-10-15	Giandhari J et al A	uMgungundlovu
SouthAfrica/KRISP-K004044/2020	GR	64	20B	South Africa	South Africa	KwaZulu-Natal	KwaZulu-Natal	EPI_ISL_635023	Human	National Health Laboratory Service - Inkosi Albert Luthuli Central Hospital (NHLS-IALCH)	B.1.1	One month ago	Africa	Female	KRISP, KZN Research Innovation and Sequencing Platform		2020-10-16	Giandhari J et al A	Harry Gwala
SouthAfrica/KRISP-K004556/2020	GR	50	20B	South Africa	South Africa	KwaZulu-Natal	KwaZulu-Natal	EPI_ISL_660253	Human	NHLS-IALCH	C.1	One week ago	Africa	Female	KRISP, KZN Research Innovation and Sequencing Platform		2020-10-19	Giandhari J et al A	Amajuba
SouthAfrica/KRISP-K004557/2020	GR	28	20B	South Africa	South Africa	KwaZulu-Natal	KwaZulu-Natal	EPI_ISL_660254	Human	NHLS-IALCH	B.1.1.54	One week ago	Africa	Male	KRISP, KZN Research Innovation and Sequencing Platform		2020-10-19	Giandhari J et al A	Amajuba
SouthAfrica/KRISP-K004054/2020	GR	30	20B	South Africa	South Africa	KwaZulu-Natal	KwaZulu-Natal	EPI_ISL_635033	Human	National Health Laboratory Service - Inkosi Albert Luthuli Central Hospital (NHLS-IALCH)	B.1.1	One month ago	Africa	Female	KRISP, KZN Research Innovation and Sequencing Platform		2020-10-20	Giandhari J et al A	uMgungundlovu
SouthAfrica/KRISP-K004071/2020	GR	51	20B	South Africa	South Africa	KwaZulu-Natal	KwaZulu-Natal	EPI_ISL_635049	Human	National Health Laboratory Service - Inkosi Albert Luthuli Central Hospital (NHLS-IALCH)	B.1.1.54	One month ago	Africa	Female	KRISP, KZN Research Innovation and Sequencing Platform		2020-10-20	Giandhari J et al A	King Cetshwayo
SouthAfrica/KRISP-K004069/2020	GR	60	20B	South Africa	South Africa	KwaZulu-Natal	KwaZulu-Natal	EPI_ISL_635047	Human	National Health Laboratory Service - Inkosi Albert Luthuli Central Hospital (NHLS-IALCH)	B.1.1.10	One month ago	Africa	Female	KRISP, KZN Research Innovation and Sequencing Platform		2020-10-20	Giandhari J et al A	Ugu
SouthAfrica/KRISP-K004734/2020	GR	3	20A	South Africa	South Africa	KwaZulu-Natal	KwaZulu-Natal	EPI_ISL_660262	Human	Molecualr Diagnostic Services (MDS)	B.1.1.25	One week ago	Africa	Female	KRISP, KZN Research Innovation and Sequencing Platform		2020-10-21	Giandhari J et al A	eThekwini
SouthAfrica/KRISP-K004559/2020	GR	36	20B	South Africa	South Africa	KwaZulu-Natal	KwaZulu-Natal	EPI_ISL_660255	Human	NHLS-IALCH	B.1.1.54	One week ago	Africa	Female	KRISP, KZN Research Innovation and Sequencing Platform		2020-10-21	Giandhari J et al A	Zululand
BurkinaFaso/3970/2020	GR	50	20B	Burkina Faso	Burkina Faso	Hauts-Bassins	Hauts-Bassins	EPI_ISL_660495	Human	Laboratoire de Microbiologie CHU Souro Sanou	B.1.1	One week ago	Africa	Male	Centre Muraz		2020-10-22	Abdoul-Salam Ouedraogo et al	Bobo Dioulasso
BurkinaFaso/2828/2020	GR	30	20B	Burkina Faso	Burkina Faso	Hauts-Bassins	Hauts-Bassins	EPI_ISL_660503	Human	Laboratoire de Microbiologie CHU Souro Sanou	B.1.1	One week ago	Africa	Male	Centre Muraz		2020-10-23	Abdoul-Salam Ouedraogo et al	Hound√©
SouthAfrica/KRISP-K004313/2020	GR	72	20B	South Africa	South Africa	KwaZulu-Natal	KwaZulu-Natal	EPI_ISL_660191	Human	NHLS-IALCH	B.1.1.56	One week ago	Africa	Female	KRISP, KZN Research Innovation and Sequencing Platform		2020-10-25	Giandhari J et al A	Ugu
SouthAfrica/KRISP-K004549/2020	GR	65	20A	South Africa	South Africa	KwaZulu-Natal	KwaZulu-Natal	EPI_ISL_660246	Human	NHLS-IALCH	B.1.1.25	One week ago	Africa	Female	KRISP, KZN Research Innovation and Sequencing Platform		2020-10-27	Giandhari J et al A	uMkhanyakude
BurkinaFaso/4202/2020	GR	27	20B	Burkina Faso	Burkina Faso	Hauts-Bassins	Hauts-Bassins	EPI_ISL_660471	Human	Laboratoire de Microbiologie CHU Souro Sanou	B.1.1	One week ago	Africa	Female	Centre Muraz		2020-10-27	Abdoul-Salam Ouedraogo et al	Bobo Dioulasso
SouthAfrica/KRISP-K004551/2020	GR	68	20B	South Africa	South Africa	KwaZulu-Natal	KwaZulu-Natal	EPI_ISL_660248	Human	NHLS-IALCH	B.1.1.10	One week ago	Africa	Female	KRISP, KZN Research Innovation and Sequencing Platform		2020-10-27	Giandhari J et al A	Harry Gwala
SouthAfrica/KRISP-K004339/2020	GR	92	20B	South Africa	South Africa	KwaZulu-Natal	KwaZulu-Natal	EPI_ISL_660215	Human	NHLS-IALCH	B.1.1	One week ago	Africa	Female	KRISP, KZN Research Innovation and Sequencing Platform		2020-10-28	Giandhari J et al A	Ugu
SouthAfrica/KRISP-K004338/2020	GR	35	20B	South Africa	South Africa	KwaZulu-Natal	KwaZulu-Natal	EPI_ISL_660214	Human	NHLS-IALCH	B.1.1.10	One week ago	Africa	Female	KRISP, KZN Research Innovation and Sequencing Platform		2020-10-28	Giandhari J et al A	Zululand
SouthAfrica/KRISP-EC-K005309/2020	GR	14	20B	South Africa	South Africa	KwaZulu-Natal	KwaZulu-Natal	EPI_ISL_678602	Human	NHLS-IALCH	B.1.1	1-2 days ago	Africa	Male	KRISP, KZN Research Innovation and Sequencing Platform		2020-10-30	Giandhari J et al A	Harry Gwala
SouthAfrica/KRISP-K004361-CE1/2020	GR	21	20B	South Africa	South Africa	KwaZulu-Natal	KwaZulu-Natal	EPI_ISL_660226	Human	NHLS-IALCH	B.1.1.54	One week ago	Africa	Female	KRISP, KZN Research Innovation and Sequencing Platform		2020-10-30	Giandhari J et al A	eThekwini
SouthAfrica/KRISP-K004351-CE1/2020	GR	18	20B	South Africa	South Africa	KwaZulu-Natal	KwaZulu-Natal	EPI_ISL_660223	Human	NHLS-IALCH	B.1.1.54	One week ago	Africa	Male	KRISP, KZN Research Innovation and Sequencing Platform		2020-10-30	Giandhari J et al A	eThekwini
SouthAfrica/KRISP-K004365-CE1/2020	GR	20	20B	South Africa	South Africa	KwaZulu-Natal	KwaZulu-Natal	EPI_ISL_660227	Human	NHLS-IALCH	B.1.1.46	One week ago	Africa	Female	KRISP, KZN Research Innovation and Sequencing Platform		2020-10-30	Giandhari J et al A	eThekwini
SouthAfrica/KRISP-K004627/2020	GR	13	20B	South Africa	South Africa	KwaZulu-Natal	KwaZulu-Natal	EPI_ISL_660643	Human	NHLS-IALCH	B.1.1	One week ago	Africa	Male	KRISP, KZN Research Innovation and Sequencing Platform		2020-11-01	Giandhari J et al A	Ugu
SouthAfrica/KRISP-K004642/2020	GR	10	20B	South Africa	South Africa	KwaZulu-Natal	KwaZulu-Natal	EPI_ISL_660657	Human	NHLS-IALCH	B.1.1.54	One week ago	Africa	Male	KRISP, KZN Research Innovation and Sequencing Platform		2020-11-01	Giandhari J et al A	Ugu
SouthAfrica/KRISP-K004638/2020	GR	42	20A	South Africa	South Africa	KwaZulu-Natal	KwaZulu-Natal	EPI_ISL_660653	Human	NHLS-IALCH	B.1.1.54	One week ago	Africa	Female	KRISP, KZN Research Innovation and Sequencing Platform		2020-11-02	Giandhari J et al A	Ugu
Tunisia/55304/2020	GR	29	20B	Tunisia	Tunisia	Tunis	Tunis	EPI_ISL_635059	Human	1-Laboratory of Microbiology, National Reference Lab, Charles Nicolle Hospital; 2-University of Tunis ElManar, Faculty of Medicine of Tunis, LR99ES09, Tunis, Tunisia	B.1.1	One month ago	Africa	Male	1-Clinical and Experimental Pharmacology Lab, LR16SP02, National Center of Pharmacovigilance, University of Tunis El Manar, Tunis, Tunisia. 2-Neurodegenerative diseases and psychiatric troubles, LR18SP03, Razi Hospital, University of Tunis El Manar, Tunis, Tunisia. 3- Ministry of Health, National Observatory of New and Emerging Diseases, 1006, Tunis, Tunisia		2020-11-02	Ilhem Boutiba-Ben Boubaker et al
SouthAfrica/KRISP-K004628/2020	GR	59	20B	South Africa	South Africa	KwaZulu-Natal	KwaZulu-Natal	EPI_ISL_660644	Human	NHLS-IALCH	B.1.1.54	One week ago	Africa	Female	KRISP, KZN Research Innovation and Sequencing Platform		2020-11-02	Giandhari J et al A	King Cetshwayo
SouthAfrica/KRISP-K004634/2020	GR	85	20B	South Africa	South Africa	KwaZulu-Natal	KwaZulu-Natal	EPI_ISL_660650	Human	NHLS-IALCH	B.1.1.54	One week ago	Africa	Female	KRISP, KZN Research Innovation and Sequencing Platform		2020-11-02	Giandhari J et al A	Ugu
SouthAfrica/KRISP-K004621/2020	GR	35	20B	South Africa	South Africa	KwaZulu-Natal	KwaZulu-Natal	EPI_ISL_660639	Human	NHLS-IALCH	B.1.1.54	One week ago	Africa	Female	KRISP, KZN Research Innovation and Sequencing Platform		2020-11-03	Giandhari J et al A	Zululand
SouthAfrica/KRISP-K004616/2020	GR	55	20B	South Africa	South Africa	KwaZulu-Natal	KwaZulu-Natal	EPI_ISL_660638	Human	NHLS-IALCH	B.1.1.56	One week ago	Africa	Female	KRISP, KZN Research Innovation and Sequencing Platform		2020-11-04	Giandhari J et al A	uMkhanyakude
BurkinaFaso/2-035-1347/2020	GR	34	20B	Burkina Faso	Burkina Faso	Hauts-Bassins	Hauts-Bassins	EPI_ISL_660452	Human	Laboratoire de Microbiologie CHU Souro Sanou	B.1.1	One week ago	Africa	Male	Centre Muraz		2020-11-04	Abdoul-Salam Ouedraogo et al	Bobo Dioulasso
SouthAfrica/KRISP-K004625/2020	GR	73	20B	South Africa	South Africa	KwaZulu-Natal	KwaZulu-Natal	EPI_ISL_660641	Human	NHLS-IALCH	B.1.1.54	One week ago	Africa	Male	KRISP, KZN Research Innovation and Sequencing Platform		2020-11-04	Giandhari J et al A	uMkhanyakude
SouthAfrica/KRISP-K004622/2020	GR	13	20B	South Africa	South Africa	KwaZulu-Natal	KwaZulu-Natal	EPI_ISL_660640	Human	NHLS-IALCH	B.1.1.54	One week ago	Africa	Female	KRISP, KZN Research Innovation and Sequencing Platform		2020-11-04	Giandhari J et al A	uMkhanyakude
SouthAfrica/KRISP-K004598/2020	GR	39	20B	South Africa	South Africa	KwaZulu-Natal	KwaZulu-Natal	EPI_ISL_660628	Human	NHLS-IALCH	B.1.1	One week ago	Africa	Female	KRISP, KZN Research Innovation and Sequencing Platform		2020-11-05	Giandhari J et al A	eThekwini
SouthAfrica/KRISP-K004276-CE1/2020	GR		20B	South Africa	South Africa	KwaZulu-Natal	KwaZulu-Natal	EPI_ISL_660160	Human	NHLS-IALCH	B.1.1.46	One week ago	Africa		KRISP, KZN Research Innovation and Sequencing Platform		2020-11-05	Giandhari J et al A	eThekwini
SouthAfrica/KRISP-K004277-CE1/2020	GR		20B	South Africa	South Africa	KwaZulu-Natal	KwaZulu-Natal	EPI_ISL_660161	Human	NHLS-IALCH	B.1.1.46	One week ago	Africa		KRISP, KZN Research Innovation and Sequencing Platform		2020-11-05	Giandhari J et al A	eThekwini
SouthAfrica/KRISP-K004280-CE1/2020	GR		20B	South Africa	South Africa	KwaZulu-Natal	KwaZulu-Natal	EPI_ISL_660163	Human	NHLS-IALCH	B.1.1.46	One week ago	Africa		KRISP, KZN Research Innovation and Sequencing Platform		2020-11-05	Giandhari J et al A	eThekwini
SouthAfrica/KRISP-K004588/2020	GR	30	20B	South Africa	South Africa	KwaZulu-Natal	KwaZulu-Natal	EPI_ISL_660618	Human	NHLS-IALCH	B.1.1.10	One week ago	Africa	Male	KRISP, KZN Research Innovation and Sequencing Platform		2020-11-06	Giandhari J et al A	Ugu
SouthAfrica/KRISP-K004592/2020	GR	57	20A	South Africa	South Africa	KwaZulu-Natal	KwaZulu-Natal	EPI_ISL_660622	Human	NHLS-IALCH	B.1.1	One week ago	Africa	Male	KRISP, KZN Research Innovation and Sequencing Platform		2020-11-07	Giandhari J et al A	uMkhanyakude
SouthAfrica/KRISP-K004594/2020	GR	55	20B	South Africa	South Africa	KwaZulu-Natal	KwaZulu-Natal	EPI_ISL_660624	Human	NHLS-IALCH	B.1.1.54	One week ago	Africa	Female	KRISP, KZN Research Innovation and Sequencing Platform		2020-11-07	Giandhari J et al A	King Cetshwayo
SouthAfrica/KRISP-K004591/2020	GR	50	20B	South Africa	South Africa	KwaZulu-Natal	KwaZulu-Natal	EPI_ISL_660621	Human	NHLS-IALCH	B.1.1.54	One week ago	Africa	Male	KRISP, KZN Research Innovation and Sequencing Platform		2020-11-07	Giandhari J et al A	eThekwini
SouthAfrica/KRISP-K004608/2020	GR	42	20A	South Africa	South Africa	KwaZulu-Natal	KwaZulu-Natal	EPI_ISL_660633	Human	NHLS-IALCH	B.1.1.25	One week ago	Africa		KRISP, KZN Research Innovation and Sequencing Platform		2020-11-08	Giandhari J et al A	uMkhanyakude
SouthAfrica/KRISP-EC-K005356/2020	GR	32	20B	South Africa	South Africa	Eastern Cape	Eastern Cape	EPI_ISL_678637	Human	NHLS-IALCH	B.1.1	1-2 days ago	Africa	Male	KRISP, KZN Research Innovation and Sequencing Platform		2020-11-13	Giandhari J et al A	Nelson Mandela Bay
SouthAfrica/KRISP-EC-K005336/2020	GR	79	20B	South Africa	South Africa	KwaZulu-Natal	KwaZulu-Natal	EPI_ISL_678624	Human	NHLS-IALCH	B.1.1	1-2 days ago	Africa	Female	KRISP, KZN Research Innovation and Sequencing Platform		2020-11-14	Giandhari J et al A	uMkhanyakude
SouthAfrica/KRISP-K004531-CS1/2020	GR	27	20A	South Africa	South Africa	KwaZulu-Natal	KwaZulu-Natal	EPI_ISL_660229	Human	KRISP, KZN Research Innovation and Sequencing Platform	B.1.1	One week ago	Africa	Male	KRISP, KZN Research Innovation and Sequencing Platform		2020-11-16	Giandhari J et al A	eThekwini
SouthAfrica/KRISP-K004533-CS1/2020	GR	36	20A	South Africa	South Africa	KwaZulu-Natal	KwaZulu-Natal	EPI_ISL_660231	Human	KRISP, KZN Research Innovation and Sequencing Platform	B.1.1	One week ago	Africa	Female	KRISP, KZN Research Innovation and Sequencing Platform		2020-11-16	Giandhari J et al A	eThekwini
SouthAfrica/KRISP-EC-K005326/2020	GR	40	20B	South Africa	South Africa	KwaZulu-Natal	KwaZulu-Natal	EPI_ISL_678616	Human	NHLS-IALCH	B.1.1.46	1-2 days ago	Africa	Male	KRISP, KZN Research Innovation and Sequencing Platform		2020-11-16	Giandhari J et al A	Ugu
SouthAfrica/KRISP-EC-K005324/2020	GR	18	20B	South Africa	South Africa	KwaZulu-Natal	KwaZulu-Natal	EPI_ISL_678614	Human	NHLS-IALCH	B.1.1	1-2 days ago	Africa	Male	KRISP, KZN Research Innovation and Sequencing Platform		2020-11-16	Giandhari J et al A	Ugu
Israel/CVL-n1749/2020	GR		20B	Israel	Israel	Central District	Central District	EPI_ISL_649098	Human	Israel Central Virology laboratory	B.1.1	One month ago	Asia		Israel Central Virology laboratory		2020-03-04	Neta Zuckerman et al	Sdema
Bahrain/090000572_S16_L001/2020	GR		20B	Bahrain	Bahrain	Bahrain	Bahrain	EPI_ISL_632285	Human	Communicable Disease Laboratory, Public Health Directorate	B.1.1.32	One month ago	Asia		Communicable Disease Laboratory, Public Health Directorate		2020-05-31	AlWasti et al		MW228280.1
Japan/Donner44/2020	GR		20B	Japan	Japan	Kanto	Kanto	EPI_ISL_644949	Human	Department of Infectious Diseases, Keio University School of Medicine, Tokyo, Japan	B.1.1	One month ago	Asia		Center for Medical Genetics, Keio University School of Medicine, Tokyo, Japan		2020-06-13	Kenjiro Kosaki et al
Japan/NGY-NNH-034/2020	GR		20B	Japan	Japan	Aichi	Aichi	EPI_ISL_637000	Human	Department of Infectious Diseases and Immunology, National Hospital Organization Nagoya Medical Center	B.1.1	One month ago	Asia		Clinical Research Center, National Hospital Organization Nagoya Medical Center		2020-07-27	Yoshihiro Nakata et al	Nagoya
Taiwan/CGMH-CGU-31/2020	GR		20B	Taiwan	Taiwan	Taiwan	Taiwan	EPI_ISL_660543	Human	Laboratory Medicine	B.1.1.30	One week ago	Asia	Female	Department of Laboratory Medicine, Lin-Kou Chang Gung Memorial Hospital, Taoyuan, Taiwan		2020-07-31	Kuo-Chien Tsao et al B	Taoyuan
Japan/Donner82/2020	GR		20B	Japan	Japan	Kanto	Kanto	EPI_ISL_644986	Human	Department of Infectious Diseases, Keio University School of Medicine, Tokyo, Japan	B.1.1	One month ago	Asia		Center for Medical Genetics, Keio University School of Medicine, Tokyo, Japan		2020-08-03	Kenjiro Kosaki et al
Japan/NGY-NNH-041/2020	GR		20B	Japan	Japan	Aichi	Aichi	EPI_ISL_637007	Human	Department of Infectious Diseases and Immunology, National Hospital Organization Nagoya Medical Center	B.1.1	One month ago	Asia		Clinical Research Center, National Hospital Organization Nagoya Medical Center		2020-08-05	Yoshihiro Nakata et al	Nagoya
Japan/Donner86/2020	GR		20B	Japan	Japan	Kanto	Kanto	EPI_ISL_644990	Human	Department of Infectious Diseases, Keio University School of Medicine, Tokyo, Japan	B.1.1	One month ago	Asia		Center for Medical Genetics, Keio University School of Medicine, Tokyo, Japan		2020-08-05	Kenjiro Kosaki et al
Japan/NGY-NNH-042/2020	GR		20B	Japan	Japan	Aichi	Aichi	EPI_ISL_637008	Human	Department of Infectious Diseases and Immunology, National Hospital Organization Nagoya Medical Center	B.1.1	One month ago	Asia		Clinical Research Center, National Hospital Organization Nagoya Medical Center		2020-08-08	Yoshihiro Nakata et al	Nagoya
Japan/Donner87/2020	GR		20B	Japan	Japan	Kanto	Kanto	EPI_ISL_644991	Human	Department of Infectious Diseases, Keio University School of Medicine, Tokyo, Japan	B.1.1	One month ago	Asia		Center for Medical Genetics, Keio University School of Medicine, Tokyo, Japan		2020-08-09	Kenjiro Kosaki et al
Japan/NGY-NNH-043/2020	GR		20B	Japan	Japan	Aichi	Aichi	EPI_ISL_637009	Human	Department of Infectious Diseases and Immunology, National Hospital Organization Nagoya Medical Center	B.1.1	One month ago	Asia		Clinical Research Center, National Hospital Organization Nagoya Medical Center		2020-08-10	Yoshihiro Nakata et al	Nagoya
Japan/NGY-NNH-044/2020	GR		20B	Japan	Japan	Aichi	Aichi	EPI_ISL_637010	Human	Department of Infectious Diseases and Immunology, National Hospital Organization Nagoya Medical Center	B.1.1	One month ago	Asia		Clinical Research Center, National Hospital Organization Nagoya Medical Center		2020-08-11	Yoshihiro Nakata et al	Nagoya
India/DL-65092-CSIR-IGIB/2020	GR	33	20B	India	India	Delhi	Delhi	EPI_ISL_636820	Human	National Centre for Disease control (NCDC)	B.1.1.72	One month ago	Asia	Male	NCDC/CSIR-IGIB		2020-08-11	Mahesh S. Dhar1* et al
Japan/NGY-NNH-045/2020	GR		20B	Japan	Japan	Aichi	Aichi	EPI_ISL_637011	Human	Department of Infectious Diseases and Immunology, National Hospital Organization Nagoya Medical Center	B.1.1	One month ago	Asia		Clinical Research Center, National Hospital Organization Nagoya Medical Center		2020-08-14	Yoshihiro Nakata et al	Nagoya
Japan/Donner89/2020	GR		20B	Japan	Japan	Kanto	Kanto	EPI_ISL_644993	Human	Department of Infectious Diseases, Keio University School of Medicine, Tokyo, Japan	B.1.1	One month ago	Asia		Center for Medical Genetics, Keio University School of Medicine, Tokyo, Japan		2020-08-16	Kenjiro Kosaki et al
Japan/Donner90/2020	GR		20B	Japan	Japan	Kanto	Kanto	EPI_ISL_644994	Human	Department of Infectious Diseases, Keio University School of Medicine, Tokyo, Japan	B.1.1	One month ago	Asia		Center for Medical Genetics, Keio University School of Medicine, Tokyo, Japan		2020-08-16	Kenjiro Kosaki et al
Japan/Donner91/2020	GR		20B	Japan	Japan	Kanto	Kanto	EPI_ISL_644995	Human	Department of Infectious Diseases, Keio University School of Medicine, Tokyo, Japan	B.1.1	One month ago	Asia		Center for Medical Genetics, Keio University School of Medicine, Tokyo, Japan		2020-08-17	Kenjiro Kosaki et al
Bahrain/340513774_S1_L001/2020	GR		20B	Bahrain	Bahrain	Bahrain	Bahrain	EPI_ISL_632262	Human	Communicable Disease Laboratory, Public Health Directorate	B.1.1.32	One month ago	Asia		Communicable Disease Laboratory, Public Health Directorate		2020-08-17	AlWasti et al		MW228051.1
Japan/Donner92/2020	GR		20B	Japan	Japan	Kanto	Kanto	EPI_ISL_644996	Human	Department of Infectious Diseases, Keio University School of Medicine, Tokyo, Japan	B.1.1	One month ago	Asia		Center for Medical Genetics, Keio University School of Medicine, Tokyo, Japan		2020-08-19	Kenjiro Kosaki et al
Japan/NGY-NNH-046/2020	GR		20B	Japan	Japan	Aichi	Aichi	EPI_ISL_637012	Human	Department of Infectious Diseases and Immunology, National Hospital Organization Nagoya Medical Center	B.1.1	One month ago	Asia		Clinical Research Center, National Hospital Organization Nagoya Medical Center		2020-08-20	Yoshihiro Nakata et al	Nagoya
Japan/Donner93/2020	GR		20B	Japan	Japan	Kanto	Kanto	EPI_ISL_644997	Human	Department of Infectious Diseases, Keio University School of Medicine, Tokyo, Japan	B.1.1	One month ago	Asia		Center for Medical Genetics, Keio University School of Medicine, Tokyo, Japan		2020-08-20	Kenjiro Kosaki et al
Japan/NGY-NNH-047/2020	GR		20B	Japan	Japan	Aichi	Aichi	EPI_ISL_637013	Human	Department of Infectious Diseases and Immunology, National Hospital Organization Nagoya Medical Center	B.1.1	One month ago	Asia		Clinical Research Center, National Hospital Organization Nagoya Medical Center		2020-08-22	Yoshihiro Nakata et al	Nagoya
Japan/NGY-NNH-048/2020	GR		20B	Japan	Japan	Aichi	Aichi	EPI_ISL_637014	Human	Department of Infectious Diseases and Immunology, National Hospital Organization Nagoya Medical Center	B.1.1	One month ago	Asia		Clinical Research Center, National Hospital Organization Nagoya Medical Center		2020-08-25	Yoshihiro Nakata et al	Nagoya
Japan/Donner94/2020	GR		20B	Japan	Japan	Kanto	Kanto	EPI_ISL_644998	Human	Department of Infectious Diseases, Keio University School of Medicine, Tokyo, Japan	B.1.1	One month ago	Asia		Center for Medical Genetics, Keio University School of Medicine, Tokyo, Japan		2020-08-25	Kenjiro Kosaki et al
Bahrain/023341084/2020	GR	30	20B	Bahrain	Bahrain	Bahrain	Bahrain	EPI_ISL_636973	Human	Public Health Lab	B.1.1.32	One month ago	Asia	Female	Public Health Lab		2020-08-26	Alwasti et al		MW227483.1
Japan/Donner95/2020	GR		20B	Japan	Japan	Kanto	Kanto	EPI_ISL_644999	Human	Department of Infectious Diseases, Keio University School of Medicine, Tokyo, Japan	B.1.1	One month ago	Asia		Center for Medical Genetics, Keio University School of Medicine, Tokyo, Japan		2020-08-27	Kenjiro Kosaki et al
Japan/NGY-NNH-049/2020	GR		20B	Japan	Japan	Aichi	Aichi	EPI_ISL_637015	Human	Department of Infectious Diseases and Immunology, National Hospital Organization Nagoya Medical Center	B.1.1	One month ago	Asia		Clinical Research Center, National Hospital Organization Nagoya Medical Center		2020-09-17	Yoshihiro Nakata et al	Nagoya
Japan/NGY-NNH-050/2020	GR		20B	Japan	Japan	Aichi	Aichi	EPI_ISL_637016	Human	Department of Infectious Diseases and Immunology, National Hospital Organization Nagoya Medical Center	B.1.1	One month ago	Asia		Clinical Research Center, National Hospital Organization Nagoya Medical Center		2020-09-22	Yoshihiro Nakata et al	Nagoya
Japan/NGY-NNH-051/2020	GR		20B	Japan	Japan	Aichi	Aichi	EPI_ISL_637017	Human	Department of Infectious Diseases and Immunology, National Hospital Organization Nagoya Medical Center	B.1.1	One month ago	Asia		Clinical Research Center, National Hospital Organization Nagoya Medical Center		2020-09-25	Yoshihiro Nakata et al	Nagoya
Bahrain/340798279/2020	GR		20B	Bahrain	Bahrain	Bahrain	Bahrain	EPI_ISL_632904	Human	Communicable Disease Laboratory, Public Health Directorate	B.1.1	One month ago	Asia		Communicable Disease Laboratory, Public Health Directorate		2020-10-02	AlTaif et al		MW242655.1
Japan/NGY-NNH-052/2020	GR		20B	Japan	Japan	Aichi	Aichi	EPI_ISL_637018	Human	Department of Infectious Diseases and Immunology, National Hospital Organization Nagoya Medical Center	B.1.1	One month ago	Asia		Clinical Research Center, National Hospital Organization Nagoya Medical Center		2020-10-05	Yoshihiro Nakata et al	Nagoya
Japan/NGY-NNH-053/2020	GR		20B	Japan	Japan	Aichi	Aichi	EPI_ISL_637019	Human	Department of Infectious Diseases and Immunology, National Hospital Organization Nagoya Medical Center	B.1.1	One month ago	Asia		Clinical Research Center, National Hospital Organization Nagoya Medical Center		2020-10-12	Yoshihiro Nakata et al	Nagoya
Bahrain/340858468_S5/2020	GR		20B	Bahrain	Bahrain	Bahrain	Bahrain	EPI_ISL_632269	Human	Communicable Disease Laboratory, Public Health Directorate	B.1.1.32	One month ago	Asia		Communicable Disease Laboratory, Public Health Directorate		2020-10-13	AlWasti et al		MW228264.1
Bahrain/340859906_S10/2020	GR		20B	Bahrain	Bahrain	Bahrain	Bahrain	EPI_ISL_632277	Human	Communicable Disease Laboratory, Public Health Directorate	B.1.1.32	One month ago	Asia		Communicable Disease Laboratory, Public Health Directorate		2020-10-14	AlWasti et al		MW228272.1
Bahrain/340861272_S28/2020	GR		20B	Bahrain	Bahrain	Bahrain	Bahrain	EPI_ISL_632257	Human	Communicable Disease Laboratory, Public Health Directorate	B.1.1.32	One month ago	Asia		Communicable Disease Laboratory, Public Health Directorate		2020-10-14	AlHujairi et al		MW237742.1
Bahrain/340859251_S1/2020	GR		20B	Bahrain	Bahrain	Bahrain	Bahrain	EPI_ISL_632273	Human	Communicable Disease Laboratory, Public Health Directorate	B.1.1.32	One month ago	Asia		Communicable Disease Laboratory, Public Health Directorate		2020-10-14	AlWasti et al		MW228268.1
Bahrain/920457374_S4/2020	GR		20B	Bahrain	Bahrain	Bahrain	Bahrain	EPI_ISL_632901	Human	Communicable Disease Laboratory, Public Health Directorate	B.1.1.32	One month ago	Asia		Communicable Disease Laboratory, Public Health Directorate		2020-10-14	AlAbbas et al		MW242650.1
Bahrain/340861245_S21/2020	GR		20B	Bahrain	Bahrain	Bahrain	Bahrain	EPI_ISL_632254	Human	Communicable Disease Laboratory, Public Health Directorate	B.1.1.32	One month ago	Asia		Communicable Disease Laboratory, Public Health Directorate		2020-10-14	AlWasti et al		MW237739.1
Bahrain/340861254_S20/2020	GR		20B	Bahrain	Bahrain	Bahrain	Bahrain	EPI_ISL_632253	Human	Communicable Disease Laboratory, Public Health Directorate	B.1.1.32	One month ago	Asia		Communicable Disease Laboratory, Public Health Directorate		2020-10-14	AlWasti et al		MW237738.1
Bahrain/340864151_S32/2020	GR		20B	Bahrain	Bahrain	Bahrain	Bahrain	EPI_ISL_632268	Human	Communicable Disease Laboratory, Public Health Directorate	B.1.1.32	One month ago	Asia		Communicable Disease Laboratory, Public Health Directorate		2020-10-14	AlWasti et al		MW228263.1
Bahrain/340859926_S12/2020	GR		20B	Bahrain	Bahrain	Bahrain	Bahrain	EPI_ISL_632279	Human	Communicable Disease Laboratory, Public Health Directorate	B.1.1.32	One month ago	Asia		Communicable Disease Laboratory, Public Health Directorate		2020-10-14	AlWasti et al		MW228274.1
Bahrain/920457301_S8/2020	GR		20B	Bahrain	Bahrain	Bahrain	Bahrain	EPI_ISL_632899	Human	Communicable Disease Laboratory, Public Health Directorate	B.1.1.32	One month ago	Asia		Communicable Disease Laboratory, Public Health Directorate		2020-10-14	AlAbbas et al		MW242648.1
Bahrain/340859867_S9/2020	GR		20B	Bahrain	Bahrain	Bahrain	Bahrain	EPI_ISL_632276	Human	Communicable Disease Laboratory, Public Health Directorate	B.1.1.32	One month ago	Asia		Communicable Disease Laboratory, Public Health Directorate		2020-10-14	AlWasti et al		MW228271.1
Bahrain/340860543/2020	GR		20B	Bahrain	Bahrain	Bahrain	Bahrain	EPI_ISL_632250	Human	Communicable Disease Laboratory, Public Health Directorate	B.1.1.32	One month ago	Asia		Communicable Disease Laboratory, Public Health Directorate		2020-10-14	AlWasti et al		MW237714.1
Bahrain/340864186/2020	GR		20B	Bahrain	Bahrain	Bahrain	Bahrain	EPI_ISL_632259	Human	Communicable Disease Laboratory, Public Health Directorate	B.1.1.32	One month ago	Asia		Communicable Disease Laboratory, Public Health Directorate		2020-10-14	AlTaif et al		MW237767.1
Bahrain/340862225_S35/2020	GR		20B	Bahrain	Bahrain	Bahrain	Bahrain	EPI_ISL_632903	Human	Communicable Disease Laboratory, Public Health Directorate	B.1.1.32	One month ago	Asia		Communicable Disease Laboratory, Public Health Directorate		2020-10-14	AlAbbas et al		MW242652.1
Singapore/1120/2020	GR	36	20B	Singapore	Singapore	Singapore	Singapore	EPI_ISL_626631	Human	National Public Health Laboratory, National Centre for Infectious Diseases	B.1.1.1	One month ago	Asia	Male	National Public Health Laboratory, National Centre for Infectious Diseases		2020-10-19	Tze Minn Mak et al
Singapore/1123/2020	GR	1	20B	Singapore	Singapore	Singapore	Singapore	EPI_ISL_626634	Human	National Public Health Laboratory, National Centre for Infectious Diseases	B.1.1.72	One month ago	Asia	Female	National Public Health Laboratory, National Centre for Infectious Diseases		2020-10-22	Tze Minn Mak et al
Japan/NGY-NNH-054/2020	GR		20B	Japan	Japan	Aichi	Aichi	EPI_ISL_637020	Human	Department of Infectious Diseases and Immunology, National Hospital Organization Nagoya Medical Center	B.1.1	One month ago	Asia		Clinical Research Center, National Hospital Organization Nagoya Medical Center		2020-10-23	Yoshihiro Nakata et al	Nagoya
Singapore/1126/2020	GR	22	20B	Singapore	Singapore	Singapore	Singapore	EPI_ISL_626638	Human	National Public Health Laboratory, National Centre for Infectious Diseases	B.1.1.72	One month ago	Asia	Female	National Public Health Laboratory, National Centre for Infectious Diseases		2020-10-24	Tze Minn Mak et al
Japan/NGY-NNH-055/2020	GR		20B	Japan	Japan	Aichi	Aichi	EPI_ISL_637021	Human	Department of Infectious Diseases and Immunology, National Hospital Organization Nagoya Medical Center	B.1.1	One month ago	Asia		Clinical Research Center, National Hospital Organization Nagoya Medical Center		2020-10-28	Yoshihiro Nakata et al	Nagoya
Singapore/1392/2020	GR	52	20B	Singapore	Singapore	Singapore	Singapore	EPI_ISL_645119	Human	National Public Health Laboratory, National Centre for Infectious Diseases	B.1.1.46	One month ago	Asia	Male	National Public Health Laboratory, National Centre for Infectious Diseases		2020-10-29	Tze Minn Mak et al
India/WB-IICB-031/2020	GR		20B	India	India	West Bengal	West Bengal	EPI_ISL_661304	Human	CSIR-Indian Institute of Chemical Biology, MEDICA Supercpecialty Hospital Kolkata	B.1.1.72	One week ago	Asia		CSIR-Indian Institute of Chemical Biology, MEDICA Supercpecialty Hospital Kolkata		2020-10-29	Sujay Krishna Maity et al
Singapore/1391/2020	GR	26	20B	Singapore	Singapore	Singapore	Singapore	EPI_ISL_645118	Human	National Public Health Laboratory, National Centre for Infectious Diseases	B.1.1.25	One month ago	Asia	Female	National Public Health Laboratory, National Centre for Infectious Diseases		2020-11-03	Tze Minn Mak et al
Palestine/WB-AQU-1/2020	GR		20B	Palestine	Palestine	Jericho	Jericho	EPI_ISL_649153	Human	Al-Quds Nutrition and Health Research Institute, Al-Quds University	B.1.1	One month ago	Asia		Al-Quds Nutrition and Health Research Institute, Al-Quds University		2020-11-07	Nasereddin et al
Bahrain/341063898_S19_L001/2020	GR		20B	Bahrain	Bahrain	Bahrain	Bahrain	EPI_ISL_678272	Human	Communicable Disease Laboratory, Public Health Directorate	B.1.1.32	1-2 days ago	Asia		Communicable Disease Laboratory, Public Health Directorate		2020-11-12	Alwasti et al
Bahrain/341063863_S17_L001/2020	GR		20B	Bahrain	Bahrain	Bahrain	Bahrain	EPI_ISL_678271	Human	Communicable Disease Laboratory, Public Health Directorate	B.1.1.32	1-2 days ago	Asia		Communicable Disease Laboratory, Public Health Directorate		2020-11-12	Alwasti et al
Bahrain/341013928_S4_L001/2020	GR		20B	Bahrain	Bahrain	Bahrain	Bahrain	EPI_ISL_678263	Human	Communicable Disease Laboratory, Public Health Directorate	B.1.1.32	1-2 days ago	Asia		Communicable Disease Laboratory, Public Health Directorate		2020-11-21	Alwasti et al
Bahrain/250182770_S11_L001/2020	GR		20B	Bahrain	Bahrain	Bahrain	Bahrain	EPI_ISL_678262	Human	Communicable Disease Laboratory, Public Health Directorate	B.1.1.32	1-2 days ago	Asia		Communicable Disease Laboratory, Public Health Directorate		2020-11-21	Alwasti et al
Bahrain/341038078_S3_L001/2020	GR		20B	Bahrain	Bahrain	Bahrain	Bahrain	EPI_ISL_678266	Human	Communicable Disease Laboratory, Public Health Directorate	B.1.1.32	1-2 days ago	Asia		Communicable Disease Laboratory, Public Health Directorate		2020-11-21	Alwasti et al
Bahrain/341051639_S14_L001/2020	GR		20B	Bahrain	Bahrain	Bahrain	Bahrain	EPI_ISL_678267	Human	Communicable Disease Laboratory, Public Health Directorate	B.1.1	1-2 days ago	Asia		Communicable Disease Laboratory, Public Health Directorate		2020-11-21	Alwasti et al
Bahrain/341016804_S1_L001/2020	GR		20B	Bahrain	Bahrain	Bahrain	Bahrain	EPI_ISL_678265	Human	Communicable Disease Laboratory, Public Health Directorate	B.1.1.32	1-2 days ago	Asia		Communicable Disease Laboratory, Public Health Directorate		2020-11-22	Alwasti et al
Bahrain/341051813_S12_L001/2020	GR		20B	Bahrain	Bahrain	Bahrain	Bahrain	EPI_ISL_678268	Human	Communicable Disease Laboratory, Public Health Directorate	B.1.1.32	1-2 days ago	Asia		Communicable Disease Laboratory, Public Health Directorate		2020-11-22	Alwasti et al
Bahrain/341016741_S2_L001/2020	GR		20B	Bahrain	Bahrain	Bahrain	Bahrain	EPI_ISL_678264	Human	Communicable Disease Laboratory, Public Health Directorate	B.1.1	1-2 days ago	Asia		Communicable Disease Laboratory, Public Health Directorate		2020-11-22	Alwasti et al
France/ARA-SC001/2020	GR	28	20B	France	France	Auvergne-Rh√¥ne-Alpes	Auvergne-Rh√¥ne-Alpes	EPI_ISL_629081	Human	Laboratoire du Centre Hospitalier Annecy Genevois	B.1.1	One month ago	Europe	Male	CNR Virus des Infections Respiratoires - France SUD		2020-02-28	Antonin Bal et al	Saint-Julien-en-Genevois
Ireland/D-NVRL-AIIDV0432v9/2020	GR		20B	Ireland	Ireland	Dublin	Dublin	EPI_ISL_644314	Human	CEPHR / Vincent's Hospital	B.1.1	One month ago	Europe	Female	Irish Coronavirus Sequencing Consortium - National Virus Reference Laboratory		2020-04-17	Michael Carr et al
NorthMacedonia/883/2020	GR	73	20B	North Macedonia	North Macedonia	Pelagonia	Pelagonia	EPI_ISL_677674	Human	General Hospital - Prilep	B.1.1	3-7 days ago	Europe	Male	Research Center for Genetic Engineering and Biotechnology "Georgi D. Efremov‚Äù , Macedonian Academy of Sciences and Arts		2020-05-20	RCGEB - MASA et al	Prilep
Serbia/NoviSad-158472905/2020	GR		20B	Serbia	Serbia	South Baƒçka District	South Baƒçka District	EPI_ISL_676590	Human	Scientific Veterinary Institute Novi Sad	B.1.1.35	3-7 days ago	Europe		Veterinary Specialized Institute "Kraljevo", Serbia		2020-05-28	Vidanovic et al	Novi Sad
Poland/PL_MCB_82/2020	GR		20B	Poland	Poland	Poland	Poland	EPI_ISL_645081	Human	Human Genome Variation Research Group, Malopolska Centre of Biotechnology	B.1.1	One month ago	Europe		Human Genome Variation Research Group, Malopolska Centre of Biotechnology		2020-06-06	Kowalski et al		MW273864.1
Sweden/20-52706/2020	GR	82	20B	Sweden	Sweden	Jonkoping	Jonkoping	EPI_ISL_654507	Human	The Public Health Agency of Sweden	B.1.1	One week ago	Europe	Male	The Public Health Agency of Sweden		2020-06-14	Anna-Malin Linde et al
NorthMacedonia/5313/2020	GR	31	20B	North Macedonia	North Macedonia	Pelagonia	Pelagonia	EPI_ISL_677714	Human	General Hospital - Prilep	B.1.1	3-7 days ago	Europe	Female	Research Center for Genetic Engineering and Biotechnology "Georgi D. Efremov‚Äù , Macedonian Academy of Sciences and Arts		2020-06-28	RCGEB - MASA et al	Prilep
Serbia/KosovskaMitrovica-05221607/2020	GR		20B	Kosovo	Kosovo	Kosovska Mitrovica	Kosovska Mitrovica	EPI_ISL_644565	Human	Veterinary Specialized Institute "Kraljevo", Serbia	B.1.1.1	One month ago	Europe		Veterinary Specialized Institute "Kraljevo", Serbia		2020-07-15	Vidanovic et al
Romania/BUCHAREST-IMT-1/2020	GR		20B	Romania	Romania	Romania	Romania	EPI_ISL_639739	Human	Centre of Nanotechnologies, INCD IMT-Bucuresti (National Institute for Research and Development in Microtechnologies - Bucharest)	B.1.1	One month ago	Europe		Centre of Nanotechnologies, INCD IMT-Bucuresti (National Institute for Research and Development in Microtechnologies - Bucharest)		2020-07-20	Salceanu et al		MW255830.1
Serbia/Srbobran-305963007/2020	GR		20B	Serbia	Serbia	South Baƒçka District	South Baƒçka District	EPI_ISL_661198	Human	Scientific Veterinary Institute Novi Sad	B.1.1.1	One week ago	Europe		Veterinary Specialized Institute "Kraljevo", Serbia		2020-07-29	Vidanovic et al	Srbobran
NorthMacedonia/8817/2020	GR	78	20B	North Macedonia	North Macedonia	Southwestern Region	Southwestern Region	EPI_ISL_677719	Human	General Hospital - Struga	B.1.1.70	3-7 days ago	Europe	Female	Research Center for Genetic Engineering and Biotechnology "Georgi D. Efremov‚Äù , Macedonian Academy of Sciences and Arts		2020-07-29	RCGEB - MASA et al	Struga
Lithuania/MR-LUHS-Eilnr201/2020	GR	72	20B	Lithuania	Lithuania	Kauno Apskritis	Kauno Apskritis	EPI_ISL_636843	Human	Lithuanian University of Health Sciences Hospital, Department of Laboratory Medicine	B.1.1	One month ago	Europe	Female	Lithuanian University of Health Sciences, Molecular cardiology lab.		2020-07-30	Lukas Zemaitis et al
Lithuania/MR-LUHS-Eilnr214/2020	GR	85	20B	Lithuania	Lithuania	Kauno Apskritis	Kauno Apskritis	EPI_ISL_636845	Human	Lithuanian University of Health Sciences Hospital, Department of Laboratory Medicine	B.1.1	One month ago	Europe	Female	Lithuanian University of Health Sciences, Molecular cardiology lab.		2020-08-02	Lukas Zemaitis et al
NorthMacedonia/9359/2020	GR	36	20B	North Macedonia	North Macedonia	Southwestern Region	Southwestern Region	EPI_ISL_677725	Human	General Hospital - Ohrid	B.1.1.1	3-7 days ago	Europe	Female	Research Center for Genetic Engineering and Biotechnology "Georgi D. Efremov‚Äù , Macedonian Academy of Sciences and Arts		2020-08-05	RCGEB - MASA et al	Ohrid
Spain/MD-IBV-99009614/2020	GR	49	20B	Spain	Spain	Madrid	Madrid	EPI_ISL_654333	Human	Hospital General Universitario Gregorio Mara√±√≥n	B.1.1	One week ago	Europe	Female	SeqCOVID-SPAIN consortium/IBV(CSIC)		2020-08-05	Dar√≠o Garc√≠a de Viedma et al	Madrid
NorthMacedonia/9360/2020	GR	75	20B	North Macedonia	North Macedonia	Southwestern Region	Southwestern Region	EPI_ISL_677726	Human	General Hospital - Ohrid	B.1.1	3-7 days ago	Europe	Male	Research Center for Genetic Engineering and Biotechnology "Georgi D. Efremov‚Äù , Macedonian Academy of Sciences and Arts		2020-08-05	RCGEB - MASA et al	Ohrid
NorthMacedonia/9304/2020	GR	58	20B	North Macedonia	North Macedonia	Eastern Region	Eastern Region	EPI_ISL_677724	Human	Clinical Hospital - Shtip	B.1.1	3-7 days ago	Europe	Male	Research Center for Genetic Engineering and Biotechnology "Georgi D. Efremov‚Äù , Macedonian Academy of Sciences and Arts		2020-08-05	RCGEB - MASA et al	Shtip
NorthMacedonia/9457/2020	GR	86	20B	North Macedonia	North Macedonia	Skopje	Skopje	EPI_ISL_678249	Human	Center for public health - Skopje	B.1.1.70	1-2 days ago	Europe	Female	Research Center for Genetic Engineering and Biotechnology "Georgi D. Efremov‚Äù , Macedonian Academy of Sciences and Arts		2020-08-06	RCGEB - MASA et al
NorthMacedonia/9451/2020	GR	67	20B	North Macedonia	North Macedonia	Skopje	Skopje	EPI_ISL_678248	Human	Center for public health - Skopje	B.1.1.70	1-2 days ago	Europe	Female	Research Center for Genetic Engineering and Biotechnology "Georgi D. Efremov‚Äù , Macedonian Academy of Sciences and Arts		2020-08-06	RCGEB - MASA et al
Ukraine/Chernivtsi_861/2020	GR	73	20B	Ukraine	Ukraine	Chernivtsi	Chernivtsi	EPI_ISL_654819	Human	Department of Respiratory and other Viral Infections of L.V.Gromashevsky Institute of Epidemiology & Infectious Diseases NAMS of Ukrain–µ	B.1.1	One week ago	Europe	Male	Department of Respiratory and other Viral Infections of L.V.Gromashevsky Institute of Epidemiology & Infectious Diseases NAMS of Ukrain–µ, JSC "Farmak"		2020-08-06	Alla Mironenko et al
Ukraine/Chernivtsi_860/2020	GR	30	20B	Ukraine	Ukraine	Chernivtsi	Chernivtsi	EPI_ISL_654818	Human	Department of Respiratory and other Viral Infections of L.V.Gromashevsky Institute of Epidemiology & Infectious Diseases NAMS of Ukrain–µ	B.1.1	One week ago	Europe	Male	Department of Respiratory and other Viral Infections of L.V.Gromashevsky Institute of Epidemiology & Infectious Diseases NAMS of Ukrain–µ, JSC "Farmak"		2020-08-06	Alla Mironenko et al
Lithuania/MR-LUHS-Eilnr248/2020	GR	58	20B	Lithuania	Lithuania	Kauno Apskritis	Kauno Apskritis	EPI_ISL_636853	Human	Lithuanian University of Health Sciences Hospital, Department of Laboratory Medicine	B.1.1	One month ago	Europe	Female	Lithuanian University of Health Sciences, Molecular cardiology lab.		2020-08-07	Lukas Zemaitis et al
Lithuania/MR-LUHS-Eilnr249/2020	GR	78	20B	Lithuania	Lithuania	Kauno Apskritis	Kauno Apskritis	EPI_ISL_636854	Human	Lithuanian University of Health Sciences Hospital, Department of Laboratory Medicine	B.1.1	One month ago	Europe	Male	Lithuanian University of Health Sciences, Molecular cardiology lab.		2020-08-07	Lukas Zemaitis et al
Lithuania/MR-LUHS-Eilnr262/2020	GR	14	20B	Lithuania	Lithuania	Kauno Apskritis	Kauno Apskritis	EPI_ISL_636856	Human	Lithuanian University of Health Sciences Hospital, Department of Laboratory Medicine	B.1.1	One month ago	Europe	Female	Lithuanian University of Health Sciences, Molecular cardiology lab.		2020-08-08	Lukas Zemaitis et al
Lithuania/MR-LUHS-Eilnr269/2020	GR	52	20B	Lithuania	Lithuania	Kauno Apskritis	Kauno Apskritis	EPI_ISL_636857	Human	Lithuanian University of Health Sciences Hospital, Department of Laboratory Medicine	B.1.1	One month ago	Europe	Male	Lithuanian University of Health Sciences, Molecular cardiology lab.		2020-08-09	Lukas Zemaitis et al
Lithuania/MR-LUHS-Eilnr302/2020	GR	34	20B	Lithuania	Lithuania	Kauno Apskritis	Kauno Apskritis	EPI_ISL_636861	Human	Lithuanian University of Health Sciences Hospital, Department of Laboratory Medicine	B.1.1	One month ago	Europe	Female	Lithuanian University of Health Sciences, Molecular cardiology lab.		2020-08-14	Lukas Zemaitis et al
Sweden/20-52776/2020	GR	25	20B	Sweden	Sweden	Kronoberg	Kronoberg	EPI_ISL_654951	Human	Klinisk mikrobiologi	B.1.1	One week ago	Europe	Male	The Public Health Agency of Sweden		2020-08-17	Anna-Malin Linde et al
Italy/APU-IZSPB-170APT/2020	GR	76	20B	Italy	Italy	Apulia	Apulia	EPI_ISL_649190	Human	Istituto Zooprofilattico Sperimentale della Puglia e della Basilicata	B.1.1	One month ago	Europe	Male	Istituto Zooprofilattico Sperimentale della Puglia e della Basilicata		2020-08-17	Parisi A. et al
Lithuania/MR-LUHS-Eilnr319/2020	GR	57	20B	Lithuania	Lithuania	Kauno Apskritis	Kauno Apskritis	EPI_ISL_636864	Human	Lithuanian University of Health Sciences Hospital, Department of Laboratory Medicine	B.1.1	One month ago	Europe	Female	Lithuanian University of Health Sciences, Molecular cardiology lab.		2020-08-17	Lukas Zemaitis et al
NorthMacedonia/10299/2020	GR	1	20B	North Macedonia	North Macedonia	Skopje	Skopje	EPI_ISL_678251	Human	Institute for Lung Diseases in Children - Skopje	B.1.1	1-2 days ago	Europe	Female	Research Center for Genetic Engineering and Biotechnology "Georgi D. Efremov‚Äù , Macedonian Academy of Sciences and Arts		2020-08-18	RCGEB - MASA et al
NorthMacedonia/10328/2020	GR	52	20B	North Macedonia	North Macedonia	Northeastern Region	Northeastern Region	EPI_ISL_678252	Human	General Hospital - Kumanovo	B.1.1.70	1-2 days ago	Europe	Female	Research Center for Genetic Engineering and Biotechnology "Georgi D. Efremov‚Äù , Macedonian Academy of Sciences and Arts		2020-08-18	RCGEB - MASA et al	Kumanovo
Lithuania/MR-LUHS-Eilnr334/2020	GR	68	20B	Lithuania	Lithuania	Taurages Apskritis	Taurages Apskritis	EPI_ISL_636866	Human	Lithuanian University of Health Sciences Hospital, Department of Laboratory Medicine	B.1.1	One month ago	Europe	Female	Lithuanian University of Health Sciences, Molecular cardiology lab.		2020-08-19	Lukas Zemaitis et al
Lithuania/MR-LUHS-Eilnr340/2020	GR	30	20B	Lithuania	Lithuania	Kauno Apskritis	Kauno Apskritis	EPI_ISL_636870	Human	Lithuanian University of Health Sciences Hospital, Department of Laboratory Medicine	B.1.1	One month ago	Europe	Female	Lithuanian University of Health Sciences, Molecular cardiology lab.		2020-08-19	Lukas Zemaitis et al
Italy/APU-IZSPB-172APT/2020	GR		20B	Italy	Italy	Apulia	Apulia	EPI_ISL_649191	Human	Istituto Zooprofilattico Sperimentale della Puglia e della Basilicata	B.1.1	One month ago	Europe	Male	Istituto Zooprofilattico Sperimentale della Puglia e della Basilicata		2020-08-20	Parisi A. et al
Russia/MOS-CRIE7157442/2020	GR	54	20B	Russia	Russia	Moscow Oblast	Moscow Oblast	EPI_ISL_653931	Human	Molecular diagnostic laboratory of Federal Budget Institution of Science "Central Research Institute of Epidemiology" of The Federal Service on Customers' Rights Protection and Human Well-being Surveillance	B.1.1	One week ago	Europe	Female	Group of Genomics and Postgenomic Technologies of Central Research Institute of Epidemilology		2020-08-24	Samoilov AE et al
Russia/MOS-CRIE7141819/2020	GR	62	20B	Russia	Russia	Moscow Oblast	Moscow Oblast	EPI_ISL_653932	Human	Molecular diagnostic laboratory of Federal Budget Institution of Science "Central Research Institute of Epidemiology" of The Federal Service on Customers' Rights Protection and Human Well-being Surveillance	B.1.1	One week ago	Europe	Male	Group of Genomics and Postgenomic Technologies of Central Research Institute of Epidemilology		2020-08-24	Samoilov AE et al
Lithuania/MR-LUHS-Eilnr364/2020	GR	25	20B	Lithuania	Lithuania	Marijampoles Apskritis	Marijampoles Apskritis	EPI_ISL_636873	Human	Lithuanian University of Health Sciences Hospital, Department of Laboratory Medicine	B.1.1.10	One month ago	Europe	Female	Lithuanian University of Health Sciences, Molecular cardiology lab.		2020-08-24	Lukas Zemaitis et al
Sweden/20-52722/2020	GR	29	20B	Sweden	Sweden	Orebro	Orebro	EPI_ISL_661282	Human	Orebro klinisk mikrobiologi	B.1.1	One week ago	Europe	Male	The Public Health Agency of Sweden		2020-08-24	Department of Microbiology et al
Russia/MOS-CRIE7150909/2020	GR	71	20B	Russia	Russia	Moscow Oblast	Moscow Oblast	EPI_ISL_653925	Human	Molecular diagnostic laboratory of Federal Budget Institution of Science "Central Research Institute of Epidemiology" of The Federal Service on Customers' Rights Protection and Human Well-being Surveillance	B.1.1	One week ago	Europe	Male	Group of Genomics and Postgenomic Technologies of Central Research Institute of Epidemilology		2020-08-24	Samoilov AE et al
Russia/MOS-CRIE7162018/2020	GR	82	20B	Russia	Russia	Moscow Oblast	Moscow Oblast	EPI_ISL_653922	Human	Molecular diagnostic laboratory of Federal Budget Institution of Science "Central Research Institute of Epidemiology" of The Federal Service on Customers' Rights Protection and Human Well-being Surveillance	B.1.1	One week ago	Europe	Female	Group of Genomics and Postgenomic Technologies of Central Research Institute of Epidemilology		2020-08-24	Samoilov AE et al
Russia/MOS-CRIE7122594/2020	GR	86	20B	Russia	Russia	Moscow Oblast	Moscow Oblast	EPI_ISL_653928	Human	Molecular diagnostic laboratory of Federal Budget Institution of Science "Central Research Institute of Epidemiology" of The Federal Service on Customers' Rights Protection and Human Well-being Surveillance	B.1.1	One week ago	Europe	Female	Group of Genomics and Postgenomic Technologies of Central Research Institute of Epidemilology		2020-08-24	Samoilov AE et al
Latvia/134/2020	GR		20B	Latvia	Latvia	Latvia	Latvia	EPI_ISL_639631	Human	E. Gulbja Laboratorija	B.1.1.25	One month ago	Europe		Latvian Biomedical Research and Study Centre		2020-08-27	Ivars Silamiƒ∑elis et al
Latvia/135/2020	GR		20B	Latvia	Latvia	Latvia	Latvia	EPI_ISL_639632	Human	CentrƒÅlƒÅ Laboratorija	B.1.1.25	One month ago	Europe		Latvian Biomedical Research and Study Centre		2020-08-28	Ivars Silamiƒ∑elis et al
Hungary/US-31273w/2020	GR	76	20B	Hungary	Hungary	B√°cs-Kiskun County	B√°cs-Kiskun County	EPI_ISL_677734	Human	University of Szeged, Institute of Clinical Microbiology	B.1.1.15	1-2 days ago	Europe	Female	National Laboratory of Virology, Szent√°gothai Research Centre		2020-08-28	Endre G√°bor T√≥th et al
Hungary/US-31260w/2020	GR	92	20B	Hungary	Hungary	Pest County	Pest County	EPI_ISL_677733	Human	University of Szeged, Institute of Clinical Microbiology	B.1.1.15	1-2 days ago	Europe	Female	National Laboratory of Virology, Szent√°gothai Research Centre		2020-08-28	Endre G√°bor T√≥th et al
Hungary/US-31248w/2020	GR	104	20B	Hungary	Hungary	B√°cs-Kiskun County	B√°cs-Kiskun County	EPI_ISL_677732	Human	University of Szeged, Institute of Clinical Microbiology	B.1.1.15	1-2 days ago	Europe	Male	National Laboratory of Virology, Szent√°gothai Research Centre		2020-08-28	Endre G√°bor T√≥th et al
Italy/APU-IZSPB-192PT/2020	GR	65	20B	Italy	Italy	Apulia	Apulia	EPI_ISL_649939	Human	I.R.C.C.S. "S. De Bellis" - Ente Ospedaliero	B.1.1	One month ago	Europe	Female	Istituto Zooprofilattico Sperimentale della Puglia e della Basilicata		2020-08-28	Parisi A. et al	Bari
Italy/APU-IZSPB-190PT/2020	GR	70	20B	Italy	Italy	Apulia	Apulia	EPI_ISL_649938	Human	I.R.C.C.S. "S. De Bellis" - Ente Ospedaliero	B.1.1	One month ago	Europe	Male	Istituto Zooprofilattico Sperimentale della Puglia e della Basilicata		2020-08-28	Parisi A. et al	Bari
Italy/APU-IZSPB_200PT/2020	GR	69	20B	Italy	Italy	Apulia	Apulia	EPI_ISL_653764	Human	I.R.C.C.S. "S. De Bellis" - Ente Ospedaliero	B.1.1	One month ago	Europe	Male	Istituto Zooprofilattico Sperimentale della Puglia e della Basilicata		2020-08-28	Parisi A. et al	Bari
Hungary/UD-56279/2020	GR	20	20B	Hungary	Hungary	Hajd√∫-Bihar County	Hajd√∫-Bihar County	EPI_ISL_671423	Human	University of Debrecen, Department of Medical Microbiology	B.1.1	3-7 days ago	Europe	Male	National Laboratory of Virology, Szent√°gothai Research Centre		2020-08-31	Endre G√°bor T√≥th et al
Hungary/US-31885w/2020	GR	78	20B	Hungary	Hungary	B√°cs-Kiskun County	B√°cs-Kiskun County	EPI_ISL_677738	Human	University of Szeged, Institute of Clinical Microbiology	B.1.1.15	1-2 days ago	Europe	Female	National Laboratory of Virology, Szent√°gothai Research Centre		2020-08-31	Endre G√°bor T√≥th et al
Hungary/US-31849w/2020	GR	44	20B	Hungary	Hungary	Csongr√°d County	Csongr√°d County	EPI_ISL_677737	Human	University of Szeged, Institute of Clinical Microbiology	B.1.1.70	1-2 days ago	Europe	Male	National Laboratory of Virology, Szent√°gothai Research Centre		2020-08-31	Endre G√°bor T√≥th et al
Lithuania/MR-LUHS-Eilnr403/2020	GR	19	20B	Lithuania	Lithuania	Kauno Apskritis	Kauno Apskritis	EPI_ISL_636878	Human	Lithuanian University of Health Sciences Hospital, Department of Laboratory Medicine	B.1.1	One month ago	Europe	Male	Lithuanian University of Health Sciences, Molecular cardiology lab.		2020-08-31	Lukas Zemaitis et al
Germany/NW-HHU-343/2020	GR		20B	Germany	Germany	North Rhine Westphalia	North Rhine Westphalia	EPI_ISL_666630	Human	ZOTZ KLIMAS MVZ D√ºsseldorf-Centrum GbR √úBAG f√ºr Labormedizin, Genetik, Zytologie, Pathologie	B.1.1	3-7 days ago	Europe		Center of Medical Microbiology, Virology, and Hospital Hygiene, University of Duesseldorf		2020-08-31	Maximilian Damagnez et al	Duesseldorf
Lithuania/MR-LUHS-Eilnr414/2020	GR	21	20B	Lithuania	Lithuania	Kauno Apskritis	Kauno Apskritis	EPI_ISL_636882	Human	Lithuanian University of Health Sciences Hospital, Department of Laboratory Medicine	B.1.1	One month ago	Europe	Female	Lithuanian University of Health Sciences, Molecular cardiology lab.		2020-09-01	Lukas Zemaitis et al
Hungary/US-32571w/2020	GR	84	20B	Hungary	Hungary	Csongr√°d County	Csongr√°d County	EPI_ISL_677759	Human	University of Szeged, Institute of Clinical Microbiology	B.1.1.70	1-2 days ago	Europe	Female	National Laboratory of Virology, Szent√°gothai Research Centre		2020-09-02	Endre G√°bor T√≥th et al
Hungary/US-33755w/2020	GR	35	20B	Hungary	Hungary	Csongr√°d County	Csongr√°d County	EPI_ISL_677766	Human	University of Szeged, Institute of Clinical Microbiology	B.1.1	1-2 days ago	Europe	Male	National Laboratory of Virology, Szent√°gothai Research Centre		2020-09-03	Endre G√°bor T√≥th et al
Lithuania/MR-LUHS-Eilnr427/2020	GR	58	20B	Lithuania	Lithuania	Kauno Apskritis	Kauno Apskritis	EPI_ISL_636885	Human	Lithuanian University of Health Sciences Hospital, Department of Laboratory Medicine	B.1.1.10	One month ago	Europe	Male	Lithuanian University of Health Sciences, Molecular cardiology lab.		2020-09-03	Lukas Zemaitis et al
Lithuania/MR-LUHS-Eilnr426/2020	GR	56	20B	Lithuania	Lithuania	Kauno Apskritis	Kauno Apskritis	EPI_ISL_636884	Human	Lithuanian University of Health Sciences Hospital, Department of Laboratory Medicine	B.1.1.10	One month ago	Europe	Female	Lithuanian University of Health Sciences, Molecular cardiology lab.		2020-09-03	Lukas Zemaitis et al
Lithuania/MR-LUHS-Eilnr431/2020	GR	48	20B	Lithuania	Lithuania	Kauno Apskritis	Kauno Apskritis	EPI_ISL_636886	Human	Lithuanian University of Health Sciences Hospital, Department of Laboratory Medicine	B.1.1	One month ago	Europe	Female	Lithuanian University of Health Sciences, Molecular cardiology lab.		2020-09-04	Lukas Zemaitis et al
Latvia/139/2020	GR		20B	Latvia	Latvia	Latvia	Latvia	EPI_ISL_639636	Human	CentrƒÅlƒÅ Laboratorija	B.1.1.25	One month ago	Europe		Latvian Biomedical Research and Study Centre		2020-09-04	Ivars Silamiƒ∑elis et al
NorthMacedonia/11567/2020	GR	40	20B	North Macedonia	North Macedonia	Skopje	Skopje	EPI_ISL_678253	Human	Institute for Lung Diseases in Children - Skopje	B.1.1	1-2 days ago	Europe	Female	Research Center for Genetic Engineering and Biotechnology "Georgi D. Efremov‚Äù , Macedonian Academy of Sciences and Arts		2020-09-07	RCGEB - MASA et al
NorthMacedonia/11638/2020	GR	24	20B	North Macedonia	North Macedonia	Southwestern Region	Southwestern Region	EPI_ISL_678256	Human	General Hospital - Ohrid	B.1.1	1-2 days ago	Europe	Female	Research Center for Genetic Engineering and Biotechnology "Georgi D. Efremov‚Äù , Macedonian Academy of Sciences and Arts		2020-09-07	RCGEB - MASA et al	Ohrid
NorthMacedonia/11602/2020	GR	63	20B	North Macedonia	North Macedonia	Southeastern Region	Southeastern Region	EPI_ISL_678254	Human	General Hospital - Strumica	B.1.1	1-2 days ago	Europe	Male	Research Center for Genetic Engineering and Biotechnology "Georgi D. Efremov‚Äù , Macedonian Academy of Sciences and Arts		2020-09-07	RCGEB - MASA et al	Strumica
NorthMacedonia/11633/2020	GR	21	20B	North Macedonia	North Macedonia	Southwestern Region	Southwestern Region	EPI_ISL_678255	Human	General Hospital - Ohrid	B.1.1	1-2 days ago	Europe	Male	Research Center for Genetic Engineering and Biotechnology "Georgi D. Efremov‚Äù , Macedonian Academy of Sciences and Arts		2020-09-07	RCGEB - MASA et al	Ohrid
Sweden/20-52831/2020	GR	46	20B	Sweden	Sweden	Vastra Gotaland	Vastra Gotaland	EPI_ISL_654956	Human	Skovde/Unilabs	B.1.1	One week ago	Europe	Male	The Public Health Agency of Sweden		2020-09-07	Anna-Malin Linde et al
Latvia/145/2020	GR		20B	Latvia	Latvia	Latvia	Latvia	EPI_ISL_639642	Human	CentrƒÅlƒÅ Laboratorija	B.1.1.25	One month ago	Europe		Latvian Biomedical Research and Study Centre		2020-09-08	Ivars Silamiƒ∑elis et al
NorthMacedonia/11805/2020	GR	59	20B	North Macedonia	North Macedonia	Pelagonia	Pelagonia	EPI_ISL_678258	Human	General Hospital - Prilep	B.1.1	1-2 days ago	Europe	Female	Research Center for Genetic Engineering and Biotechnology "Georgi D. Efremov‚Äù , Macedonian Academy of Sciences and Arts		2020-09-09	RCGEB - MASA et al	Prilep
Ireland/LH-NVRL-73IRL45358/2020	GR		20B	Ireland	Ireland	Louth	Louth	EPI_ISL_639861	Human	National Virus Reference Laboratory	B.1.1	One month ago	Europe	Female	National Virus Reference Laboratory		2020-09-09	Michael Carr et al
Latvia/144/2020	GR		20B	Latvia	Latvia	Latvia	Latvia	EPI_ISL_639641	Human	E. Gulbja Laboratorija	B.1.1.25	One month ago	Europe		Latvian Biomedical Research and Study Centre		2020-09-09	Ivars Silamiƒ∑elis et al
NorthMacedonia/11890/2020	GR	64	20B	North Macedonia	North Macedonia	Eastern Region	Eastern Region	EPI_ISL_678259	Human	Clinical Hospital - Shtip	B.1.1.70	1-2 days ago	Europe	Male	Research Center for Genetic Engineering and Biotechnology "Georgi D. Efremov‚Äù , Macedonian Academy of Sciences and Arts		2020-09-09	RCGEB - MASA et al	Shtip
NorthMacedonia/11777/2020	GR	43	20B	North Macedonia	North Macedonia	Southwestern Region	Southwestern Region	EPI_ISL_678257	Human	PHI Institute of Nephrology - Struga	B.1.1.70	1-2 days ago	Europe	Male	Research Center for Genetic Engineering and Biotechnology "Georgi D. Efremov‚Äù , Macedonian Academy of Sciences and Arts		2020-09-09	RCGEB - MASA et al	Struga
Latvia/168/2020	GR		20B	Latvia	Latvia	Latvia	Latvia	EPI_ISL_639665	Human	E. Gulbja Laboratorija	B.1.1.25	One month ago	Europe		Latvian Biomedical Research and Study Centre		2020-09-10	Ivars Silamiƒ∑elis et al
Sweden/20-52956/2020	GR	28	20B	Sweden	Sweden	Vastmanland	Vastmanland	EPI_ISL_660427	Human	Klinisk Mikrobiologi	B.1.1	One week ago	Europe	Male	The Public Health Agency of Sweden		2020-09-10	Anna-Malin Linde et al
NorthMacedonia/12026/2020	GR	80	20B	North Macedonia	North Macedonia	Southwestern Region	Southwestern Region	EPI_ISL_678260	Human	General Hospital - Struga	B.1.1	1-2 days ago	Europe	Male	Research Center for Genetic Engineering and Biotechnology "Georgi D. Efremov‚Äù , Macedonian Academy of Sciences and Arts		2020-09-11	RCGEB - MASA et al	Struga
Latvia/167/2020	GR		20B	Latvia	Latvia	Latvia	Latvia	EPI_ISL_639664	Human	E. Gulbja Laboratorija	B.1.1.25	One month ago	Europe		Latvian Biomedical Research and Study Centre		2020-09-11	Ivars Silamiƒ∑elis et al
Netherlands/ZH-EMC-868/2020	GR		20B	Netherlands	Netherlands	South Holland	South Holland	EPI_ISL_632405	Human	Dutch COVID-19 response team	B.1.1	One month ago	Europe		Erasmus Medical Center		2020-09-11	Bas Oude Munnink et al
Sweden/20-52963/2020	GR	18	20B	Sweden	Sweden	Vastmanland	Vastmanland	EPI_ISL_660431	Human	Klinisk Mikrobiologi	B.1.1	One week ago	Europe	Male	The Public Health Agency of Sweden		2020-09-12	Anna-Malin Linde et al
Belgium/ULG-10725/2020	GR	56	20B	Belgium	Belgium	Li√®ge	Li√®ge	EPI_ISL_641567	Human	Department of Clinical Microbiology	B.1.1.1	One month ago	Europe	Female	GIGA Medical Genomics		2020-09-15	Keith Durkin et al
CzechRepublic/NRL_9075/2020	GR	20	20B	Czech Republic	Czech Republic	Prague	Prague	EPI_ISL_626585	Human	The National Institute of Public Health	B.1.1.1	One month ago	Europe	Male	State Veterinary Institute Prague		2020-09-18	Nagy et al
Belgium/ULG-10736/2020	GR	55	20B	Belgium	Belgium	Li√®ge	Li√®ge	EPI_ISL_641578	Human	Department of Clinical Microbiology	B.1.1.55	One month ago	Europe	Male	GIGA Medical Genomics		2020-09-18	Keith Durkin et al
Russia/MOS-RII-MH2802S/2020	GR	47	20B	Russia	Russia	Moscow Oblast	Moscow Oblast	EPI_ISL_639952	Human	HELIX LLC	B.1.1	One month ago	Europe	Male	WHO National Influenza Centre Russian Federation		2020-09-19	Andrey Komissarov et al	Korolyov
Germany/NW-HHU-262/2020	GR		20B	Germany	Germany	North Rhine Westphalia	North Rhine Westphalia	EPI_ISL_631350	Human	ZOTZ KLIMAS MVZ D√ºsseldorf-Centrum GbR √úBAG f√ºr Labormedizin, Genetik, Zytologie, Pathologie	B.1.1	One month ago	Europe		Center of Medical Microbiology, Virology, and Hospital Hygiene, University of Duesseldorf		2020-09-21	Maximilian Damagnez et al	Duesseldorf
Latvia/158/2020	GR		20B	Latvia	Latvia	Latvia	Latvia	EPI_ISL_639655	Human	CentrƒÅlƒÅ Laboratorija	B.1.1	One month ago	Europe		Latvian Biomedical Research and Study Centre		2020-09-21	Ivars Silamiƒ∑elis et al
Spain/MD-IBV-99008533/2020	GR	66	20B	Spain	Spain	Madrid	Madrid	EPI_ISL_654081	Human	Hospital General Universitario Gregorio Mara√±√≥n	B.1.1	One week ago	Europe	Female	SeqCOVID-SPAIN consortium/IBV(CSIC)		2020-09-21	Dar√≠o Garc√≠a de Viedma et al	Madrid
Italy/APU-IZSPB_265PT/2020	GR	59	20B	Italy	Italy	Apulia	Apulia	EPI_ISL_653784	Human	Istituto Zooprofilattico Sperimentale della Puglia e della Basilicata	B.1.1	One month ago	Europe	Female	Istituto Zooprofilattico Sperimentale della Puglia e della Basilicata		2020-09-22	Parisi A. et al	Bari
CzechRepublic/NRL-9964/2020	GR	82	20B	Czech Republic	Czech Republic	South Moravian Region	South Moravian Region	EPI_ISL_660597	Human	The National Institute of Public Health	B.1.1	One week ago	Europe	Female	State Veterinary Institute Prague		2020-09-22	Nagy et al	Brno
Germany/NW-HHU-271/2020	GR		20B	Germany	Germany	North Rhine Westphalia	North Rhine Westphalia	EPI_ISL_631359	Human	ZOTZ KLIMAS MVZ D√ºsseldorf-Centrum GbR √úBAG f√ºr Labormedizin, Genetik, Zytologie, Pathologie	B.1.1	One month ago	Europe		Center of Medical Microbiology, Virology, and Hospital Hygiene, University of Duesseldorf		2020-09-23	Maximilian Damagnez et al	Duesseldorf
Germany/NW-HHU-268/2020	GR		20B	Germany	Germany	North Rhine Westphalia	North Rhine Westphalia	EPI_ISL_631356	Human	ZOTZ KLIMAS MVZ D√ºsseldorf-Centrum GbR √úBAG f√ºr Labormedizin, Genetik, Zytologie, Pathologie	B.1.1.10	One month ago	Europe		Center of Medical Microbiology, Virology, and Hospital Hygiene, University of Duesseldorf		2020-09-23	Maximilian Damagnez et al	Duesseldorf
CzechRepublic/NRL_9329/2020	GR	34	20B	Czech Republic	Czech Republic	Prague	Prague	EPI_ISL_626586	Human	The National Institute of Public Health	B.1.1	One month ago	Europe	Female	State Veterinary Institute Prague		2020-09-25	Nagy et al
Latvia/181/2020	GR		20B	Latvia	Latvia	Latvia	Latvia	EPI_ISL_639678	Human	CentrƒÅlƒÅ Laboratorija	B.1.1	One month ago	Europe		Latvian Biomedical Research and Study Centre		2020-09-26	Ivars Silamiƒ∑elis et al
Sweden/20-52999/2020	GR	47	20B	Sweden	Sweden	Ostergotland	Ostergotland	EPI_ISL_661284	Human	Klinsisk mikrobiologi Linkoping	B.1.1	One week ago	Europe	Male	The Public Health Agency of Sweden		2020-09-27	Department of Microbiology et al
Germany/NW-HHU-277/2020	GR		20B	Germany	Germany	North Rhine Westphalia	North Rhine Westphalia	EPI_ISL_631321	Human	ZOTZ KLIMAS MVZ D√ºsseldorf-Centrum GbR √úBAG f√ºr Labormedizin, Genetik, Zytologie, Pathologie	B.1.1	One month ago	Europe		Center of Medical Microbiology, Virology, and Hospital Hygiene, University of Duesseldorf		2020-09-28	Maximilian Damagnez et al	Duesseldorf
Germany/NW-HHU-281/2020	GR		20B	Germany	Germany	North Rhine Westphalia	North Rhine Westphalia	EPI_ISL_631325	Human	ZOTZ KLIMAS MVZ D√ºsseldorf-Centrum GbR √úBAG f√ºr Labormedizin, Genetik, Zytologie, Pathologie	B.1.1	One month ago	Europe		Center of Medical Microbiology, Virology, and Hospital Hygiene, University of Duesseldorf		2020-09-28	Maximilian Damagnez et al	Duesseldorf
Italy/APU-IZSPB_266PT/2020	GR	24	20B	Italy	Italy	Apulia	Apulia	EPI_ISL_653785	Human	Istituto Zooprofilattico Sperimentale della Puglia e della Basilicata	B.1.1	One month ago	Europe	Female	Istituto Zooprofilattico Sperimentale della Puglia e della Basilicata		2020-09-29	Parisi A. et al	Foggia
Latvia/173/2020	GR		20B	Latvia	Latvia	Latvia	Latvia	EPI_ISL_639670	Human	E. Gulbja Laboratorija	B.1.1.25	One month ago	Europe		Latvian Biomedical Research and Study Centre		2020-09-29	Ivars Silamiƒ∑elis et al
CzechRepublic/NRL_9429/2020	GR	36	20B	Czech Republic	Czech Republic	Prague	Prague	EPI_ISL_626588	Human	The National Institute of Public Health	B.1.1	One month ago	Europe	Male	State Veterinary Institute Prague		2020-09-29	Nagy et al
Latvia/178/2020	GR		20B	Latvia	Latvia	Latvia	Latvia	EPI_ISL_639675	Human	E. Gulbja Laboratorija	B.1.1.25	One month ago	Europe		Latvian Biomedical Research and Study Centre		2020-09-30	Ivars Silamiƒ∑elis et al
Germany/NW-HHU-295/2020	GR		20B	Germany	Germany	North Rhine Westphalia	North Rhine Westphalia	EPI_ISL_631339	Human	ZOTZ KLIMAS MVZ D√ºsseldorf-Centrum GbR √úBAG f√ºr Labormedizin, Genetik, Zytologie, Pathologie	B.1.1	One month ago	Europe		Center of Medical Microbiology, Virology, and Hospital Hygiene, University of Duesseldorf		2020-10-01	Maximilian Damagnez et al	Duesseldorf
Latvia/185/2020	GR		20B	Latvia	Latvia	Latvia	Latvia	EPI_ISL_639682	Human	E. Gulbja Laboratorija	B.1.1.37	One month ago	Europe		Latvian Biomedical Research and Study Centre		2020-10-01	Ivars Silamiƒ∑elis et al
Sweden/20-53067/2020	GR	53	20B	Sweden	Sweden	Kalmar	Kalmar	EPI_ISL_676534	Human	Kalmar klinisk mikrobiologi	B.1.1	3-7 days ago	Europe	Male	The Public Health Agency of Sweden		2020-10-02	Department of Microbiology et al
Norway/4066/2020	GR		20B	Norway	Norway	Viken	Viken	EPI_ISL_635159	Human	Medical Microbiology Unit, Department for Laboratory Medicine, Drammen Hospital, Vestre Viken Health Trust,	B.1.1	One month ago	Europe		Norwegian Institute of Public Health, Department of Virology		2020-10-04	Kathrine Stene-Johansen et al
Germany/NW-HHU-306/2020	GR		20B	Germany	Germany	North Rhine Westphalia	North Rhine Westphalia	EPI_ISL_631309	Human	ZOTZ KLIMAS MVZ D√ºsseldorf-Centrum GbR √úBAG f√ºr Labormedizin, Genetik, Zytologie, Pathologie	B.1.1	One month ago	Europe		Center of Medical Microbiology, Virology, and Hospital Hygiene, University of Duesseldorf		2020-10-05	Maximilian Damagnez et al	Duesseldorf
Germany/NW-HHU-303/2020	GR		20B	Germany	Germany	North Rhine Westphalia	North Rhine Westphalia	EPI_ISL_631306	Human	ZOTZ KLIMAS MVZ D√ºsseldorf-Centrum GbR √úBAG f√ºr Labormedizin, Genetik, Zytologie, Pathologie	B.1.1	One month ago	Europe		Center of Medical Microbiology, Virology, and Hospital Hygiene, University of Duesseldorf		2020-10-05	Maximilian Damagnez et al	Duesseldorf
Latvia/192/2020	GR		20B	Latvia	Latvia	Latvia	Latvia	EPI_ISL_639689	Human	E. Gulbja Laboratorija	B.1.1.25	One month ago	Europe		Latvian Biomedical Research and Study Centre		2020-10-05	Ivars Silamiƒ∑elis et al
Germany/NW-HHU-311/2020	GR		20B	Germany	Germany	North Rhine Westphalia	North Rhine Westphalia	EPI_ISL_631314	Human	ZOTZ KLIMAS MVZ D√ºsseldorf-Centrum GbR √úBAG f√ºr Labormedizin, Genetik, Zytologie, Pathologie	B.1.1	One month ago	Europe		Center of Medical Microbiology, Virology, and Hospital Hygiene, University of Duesseldorf		2020-10-05	Maximilian Damagnez et al	Duesseldorf
Latvia/172/2020	GR		20B	Latvia	Latvia	Latvia	Latvia	EPI_ISL_639669	Human	E. Gulbja Laboratorija	B.1.1.37	One month ago	Europe		Latvian Biomedical Research and Study Centre		2020-10-05	Ivars Silamiƒ∑elis et al
Norway/4314/2020	GR		20B	Norway	Norway	Innlandet	Innlandet	EPI_ISL_635183	Human	Innlandet Hospital Trust, Division Lillehammer, Department for Medical Microbiology	B.1.1	One month ago	Europe		Norwegian Institute of Public Health, Department of Virology		2020-10-06	Kathrine Stene-Johansen et al
Norway/4621/2020	GR		20B	Norway	Norway	Vestland	Vestland	EPI_ISL_635176	Human	Foerde Hospital, Department of Microbiology	B.1.1	One month ago	Europe		Norwegian Institute of Public Health, Department of Virology		2020-10-06	Kathrine Stene-Johansen et al
Germany/NW-HHU-316/2020	GR		20B	Germany	Germany	North Rhine Westphalia	North Rhine Westphalia	EPI_ISL_631319	Human	ZOTZ KLIMAS MVZ D√ºsseldorf-Centrum GbR √úBAG f√ºr Labormedizin, Genetik, Zytologie, Pathologie	B.1.1.54	One month ago	Europe		Center of Medical Microbiology, Virology, and Hospital Hygiene, University of Duesseldorf		2020-10-06	Maximilian Damagnez et al	Duesseldorf
Latvia/195/2020	GR		20B	Latvia	Latvia	Latvia	Latvia	EPI_ISL_639692	Human	E. Gulbja Laboratorija	B.1.1.37	One month ago	Europe		Latvian Biomedical Research and Study Centre		2020-10-06	Ivars Silamiƒ∑elis et al
Germany/NW-HHU-315/2020	GR		20B	Germany	Germany	North Rhine Westphalia	North Rhine Westphalia	EPI_ISL_631318	Human	ZOTZ KLIMAS MVZ D√ºsseldorf-Centrum GbR √úBAG f√ºr Labormedizin, Genetik, Zytologie, Pathologie	B.1.1	One month ago	Europe		Center of Medical Microbiology, Virology, and Hospital Hygiene, University of Duesseldorf		2020-10-06	Maximilian Damagnez et al	Duesseldorf
CzechRepublic/NRL_9713/2020	GR	27	20B	Czech Republic	Czech Republic	Plze≈à Region	Plze≈à Region	EPI_ISL_626605	Human	The National Institute of Public Health	B.1.1.1	One month ago	Europe	Male	State Veterinary Institute Prague		2020-10-07	Nagy et al	Dob≈ôany
Latvia/196/2020	GR		20B	Latvia	Latvia	Latvia	Latvia	EPI_ISL_639693	Human	E. Gulbja Laboratorija	B.1.1	One month ago	Europe		Latvian Biomedical Research and Study Centre		2020-10-07	Ivars Silamiƒ∑elis et al
Latvia/175/2020	GR		20B	Latvia	Latvia	Latvia	Latvia	EPI_ISL_639672	Human	CentrƒÅlƒÅ Laboratorija	B.1.1.37	One month ago	Europe		Latvian Biomedical Research and Study Centre		2020-10-07	Ivars Silamiƒ∑elis et al
Hungary/UD-94347/2020	GR	30	20B	Hungary	Hungary	Borsod-Aba√∫j-Zempl√©n County	Borsod-Aba√∫j-Zempl√©n County	EPI_ISL_678389	Human	University of Debrecen, Department of Medical Microbiology	B.1.1	1-2 days ago	Europe	Male	National Laboratory of Virology, Szent√°gothai Research Centre		2020-10-08	Endre G√°bor T√≥th et al
Latvia/193/2020	GR		20B	Latvia	Latvia	Latvia	Latvia	EPI_ISL_639690	Human	E. Gulbja Laboratorija	B.1.1	One month ago	Europe		Latvian Biomedical Research and Study Centre		2020-10-08	Ivars Silamiƒ∑elis et al
Ireland/CO-NVRL-75IRL73676/2020	GR		20B	Ireland	Ireland	Cork	Cork	EPI_ISL_671879	Human	National Virus Reference Laboratory	B.1.1	3-7 days ago	Europe	Male	National Virus Reference Laboratory		2020-10-11	Michael Carr et al
Latvia/188/2020	GR		20B	Latvia	Latvia	Latvia	Latvia	EPI_ISL_639685	Human	E. Gulbja Laboratorija	B.1.1.25	One month ago	Europe		Latvian Biomedical Research and Study Centre		2020-10-12	Ivars Silamiƒ∑elis et al
Germany/NW-HHU-321/2020	GR		20B	Germany	Germany	North Rhine Westphalia	North Rhine Westphalia	EPI_ISL_666623	Human	ZOTZ KLIMAS MVZ D√ºsseldorf-Centrum GbR √úBAG f√ºr Labormedizin, Genetik, Zytologie, Pathologie	B.1.1	3-7 days ago	Europe		Center of Medical Microbiology, Virology, and Hospital Hygiene, University of Duesseldorf		2020-10-12	Maximilian Damagnez et al	Duesseldorf
Germany/NW-HHU-334/2020	GR		20B	Germany	Germany	North Rhine Westphalia	North Rhine Westphalia	EPI_ISL_666628	Human	ZOTZ KLIMAS MVZ D√ºsseldorf-Centrum GbR √úBAG f√ºr Labormedizin, Genetik, Zytologie, Pathologie	B.1.1.64	3-7 days ago	Europe		Center of Medical Microbiology, Virology, and Hospital Hygiene, University of Duesseldorf		2020-10-13	Maximilian Damagnez et al	Duesseldorf
Latvia/177/2020	GR		20B	Latvia	Latvia	Latvia	Latvia	EPI_ISL_639674	Human	E. Gulbja Laboratorija	B.1.1	One month ago	Europe		Latvian Biomedical Research and Study Centre		2020-10-13	Ivars Silamiƒ∑elis et al
Latvia/194/2020	GR		20B	Latvia	Latvia	Latvia	Latvia	EPI_ISL_639691	Human	E. Gulbja Laboratorija	B.1.1.25	One month ago	Europe		Latvian Biomedical Research and Study Centre		2020-10-13	Ivars Silamiƒ∑elis et al
France/PAC-MEPHI-2413/2020	GR		20B	France	France	Provence-Alpes-C√¥te d'Azur	Provence-Alpes-C√¥te d'Azur	EPI_ISL_644561	Human	MEPHI, Aix Marseille University	B.1.1	One month ago	Europe		MEPHI, Aix Marseille University		2020-10-14	Anthony LEVASSEUR et al	Marseille
Norway/4543/2020	GR		20B	Norway	Norway	Vestfold Og Telemark	Vestfold Og Telemark	EPI_ISL_635168	Human	Vestfold Hospital, Toensberg Department of Microbiology	B.1.1	One month ago	Europe		Norwegian Institute of Public Health, Department of Virology		2020-10-15	Kathrine Stene-Johansen et al
Netherlands/ZH-EMC-831/2020	GR		20B	Netherlands	Netherlands	South Holland	South Holland	EPI_ISL_632701	Human	Dutch COVID-19 response team	B.1.1	One month ago	Europe		Erasmus Medical Center		2020-10-17	Bas Oude Munnink et al
Sweden/20-23816/2020	GR	52	20B	Sweden	Sweden	Sweden	Sweden	EPI_ISL_654501	Human	The Public Health Agency of Sweden	B.1.1	One week ago	Europe	Male	The Public Health Agency of Sweden		2020-10-19	Anna-Malin Linde et al
Belgium/ULG-10521/2020	GR	47	20B	Belgium	Belgium	Li√®ge	Li√®ge	EPI_ISL_626279	Human	Department of Clinical Microbiology	B.1.1.1	One month ago	Europe	Male	GIGA Medical Genomics		2020-10-23	Keith Durkin et al
Italy/APU-IZSPB_308PT/2020	GR	81	20B	Italy	Italy	Apulia	Apulia	EPI_ISL_653802	Human	I.R.C.C.S. "S. De Bellis" - Ente Ospedaliero	B.1.1	One month ago	Europe	Male	Istituto Zooprofilattico Sperimentale della Puglia e della Basilicata		2020-10-24	Parisi A. et al	Bari
Italy/APU-IZSPB_328PT/2020	GR	59	20B	Italy	Italy	Apulia	Apulia	EPI_ISL_653821	Human	I.R.C.C.S. "S. De Bellis" - Ente Ospedaliero	B.1.1	One month ago	Europe	Male	Istituto Zooprofilattico Sperimentale della Puglia e della Basilicata		2020-10-27	Parisi A. et al	Bari
Italy/APU-IZSPB_291PT/2020	GR	39	20B	Italy	Italy	Apulia	Apulia	EPI_ISL_653782	Human	I.R.C.C.S. "S. De Bellis" - Ente Ospedaliero	B.1.1.35	One month ago	Europe	Male	Istituto Zooprofilattico Sperimentale della Puglia e della Basilicata		2020-10-30	Parisi A. et al	Brindisi
Netherlands/ZH-EMC-894/2020	GR		20B	Netherlands	Netherlands	South Holland	South Holland	EPI_ISL_632406	Human	Dutch COVID-19 response team	B.1.1	One month ago	Europe		Erasmus Medical Center		2020-11-01	Bas Oude Munnink et al
Denmark/DCGC-11492/2020	GR		20B	Denmark	Denmark	Hovedstaden	Hovedstaden	EPI_ISL_670955	Human	Department of Virus and Microbiological Special Diagnostics, Statens Serum Institut, Copenhagen, Denmark	B.1.1	3-7 days ago	Europe		Albertsen Lab, Department of Chemistry and Bioscience, Aalborg University, Denmark		2020-11-02	Danish Covid-19 Genome Consortium et al
Italy/APU-IZSPB_306PT/2020	GR	17	20B	Italy	Italy	Apulia	Apulia	EPI_ISL_653800	Human	I.R.C.C.S. "S. De Bellis" - Ente Ospedaliero	B.1.1.39	One month ago	Europe	Female	Istituto Zooprofilattico Sperimentale della Puglia e della Basilicata		2020-11-03	Parisi A. et al	Bari
Sweden/20-53401/2020	GR	56	20B	Sweden	Sweden	Vastra Gotaland	Vastra Gotaland	EPI_ISL_661301	Human	Klinisk Mikrobiologi	B.1.1	One week ago	Europe	Male	The Public Health Agency of Sweden		2020-11-04	Department of Microbiology et al
Sweden/20-53398/2020	GR	38	20B	Sweden	Sweden	Vastra Gotaland	Vastra Gotaland	EPI_ISL_676518	Human	Klinisk Mikrobiologi	B.1.1	3-7 days ago	Europe	Male	The Public Health Agency of Sweden		2020-11-04	Department of Microbiology et al
Sweden/20-09862/2020	GR	15	20B	Sweden	Sweden	Skane	Skane	EPI_ISL_676490	Human	Klinisk mikrobiologi	B.1.1	3-7 days ago	Europe	Female	The Public Health Agency of Sweden		2020-11-04	Department of Microbiology et al
England/CAMC-B37E38/2020	GR		20B	United Kingdom	United Kingdom	England	England	EPI_ISL_658948	Human	Lighthouse Lab in Cambridge	D.1	One week ago	Europe		Wellcome Sanger Institute for the COVID-19 Genomics UK (COG-UK) Consortium		2020-11-05	Rob Howes et al
Denmark/DCGC-9792/2020	GR		20B	Denmark	Denmark	Midtjylland	Midtjylland	EPI_ISL_669181	Human	Department of Virus and Microbiological Special Diagnostics, Statens Serum Institut, Copenhagen, Denmark	B.1.1	3-7 days ago	Europe		Albertsen Lab, Department of Chemistry and Bioscience, Aalborg University, Denmark		2020-11-09	Danish Covid-19 Genome Consortium et al
Denmark/DCGC-9579/2020	GR		20B	Denmark	Denmark	Midtjylland	Midtjylland	EPI_ISL_669047	Human	Department of Virus and Microbiological Special Diagnostics, Statens Serum Institut, Copenhagen, Denmark	B.1.1.70	3-7 days ago	Europe		Albertsen Lab, Department of Chemistry and Bioscience, Aalborg University, Denmark		2020-11-09	Danish Covid-19 Genome Consortium et al
Denmark/DCGC-9874/2020	GR		20B	Denmark	Denmark	Midtjylland	Midtjylland	EPI_ISL_669244	Human	Department of Virus and Microbiological Special Diagnostics, Statens Serum Institut, Copenhagen, Denmark	B.1.1.54	3-7 days ago	Europe		Albertsen Lab, Department of Chemistry and Bioscience, Aalborg University, Denmark		2020-11-09	Danish Covid-19 Genome Consortium et al
Sweden/20-09865/2020	GR	86	20B	Sweden	Sweden	Skane	Skane	EPI_ISL_661277	Human	Klinisk mikrobiologi	B.1.1	One week ago	Europe	Male	The Public Health Agency of Sweden		2020-11-10	Department of Microbiology et al
Sweden/20-53532/2020	GR	25	20B	Sweden	Sweden	Jonkoping	Jonkoping	EPI_ISL_676505	Human	Klinisk mikrobiologi	B.1.1	3-7 days ago	Europe	Male	The Public Health Agency of Sweden		2020-11-10	Department of Microbiology et al
Sweden/20-09868/2020	GR	58	20B	Sweden	Sweden	Kronoberg	Kronoberg	EPI_ISL_676491	Human	Klinisk mikrobiologi	B.1.1	3-7 days ago	Europe	Male	The Public Health Agency of Sweden		2020-11-22	Department of Microbiology et al
Mexico/QROO-InDRE-53/2020	GR	38	20B	Mexico	Mexico	Quintana Roo	Quintana Roo	EPI_ISL_658904	Human	Instituto de Diagnostico y Referencia Epidemiologicos (INDRE)	B.1.1	One week ago	North America	Male	Instituto de Diagnostico y Referencia Epidemiologicos (INDRE)		2020-04-10	Ernesto Ramirez-Gonzalez et al
USA/IL-NM-0960/2020	GR		20B	USA	USA	Illinois	Illinois	EPI_ISL_626486	Human	Northwestern Memorial Hospital	B.1.1.73	One month ago	North America		Ozer Lab		2020-05-27	Ramon Lorenzo-Redondo et al A	Chicago
USA/CO-CDPHE-2006280582/2020	GR		20B	USA	USA	Colorado	Colorado	EPI_ISL_677268	Human	Colorado Department of Public Health and Environment	B.1.1	3-7 days ago	North America		Colorado Department of Puplic Health and Environment		2020-06-26	Laura Bankers et al
USA/IL-NM-1385/2020	GR		20B	USA	USA	Illinois	Illinois	EPI_ISL_626517	Human	Northwestern Memorial Hospital	B.1.1	One month ago	North America		Ozer Lab		2020-06-28	Ramon Lorenzo-Redondo et al A	Chicago
USA/NY-Wadsworth-194573-01/2020	GR	42	20B	USA	USA	New York	New York	EPI_ISL_676651	Human	Wadsworth Center, New York State Department.of Health	B.1.1.25	3-7 days ago	North America	Male	Wadsworth Center, New York State Department.of Health		2020-08-07	Kirsten St. George et al	Erie County
USA/NY-Wadsworth-194584-01/2020	GR	49	20B	USA	USA	New York	New York	EPI_ISL_676660	Human	Wadsworth Center, New York State Department.of Health	B.1.1.25	3-7 days ago	North America	Male	Wadsworth Center, New York State Department.of Health		2020-08-07	Kirsten St. George et al	Erie County
USA/OR-OHSU-2369/2020	GR	19	20B	USA	USA	Oregon	Oregon	EPI_ISL_667194	Human	OHSU Lab Services Molecular Microbiology Lab	B.1.1	3-7 days ago	North America	Male	Oregon SARS-CoV-2 Genome Sequencing Center		2020-08-12	Brendan L. O'Connell et al	Washington County OR
USA/MD-MDH-0301/2020	GR		20B	USA	USA	Maryland	Maryland	EPI_ISL_633083	Human	MD PHL	B.1.1	One month ago	North America		MD PHL		2020-08-16	Maryland Department of Health Laboratories Administration et al		MW243996.1
USA/CO-CDPHE-2008181790/2020	GR		20B	USA	USA	Colorado	Colorado	EPI_ISL_677310	Human	Colorado Department of Public Health and Environment	B.1.1	3-7 days ago	North America		Colorado Department of Puplic Health and Environment		2020-08-17	Laura Bankers et al
USA/NY-Wadsworth-226480-01/2020	GR	33	20B	USA	USA	New York	New York	EPI_ISL_677112	Human	Masonic Medical Research Institute	B.1.1	3-7 days ago	North America	Female	Wadsworth Center, New York State Department.of Health		2020-08-20	Nathan Tucker et al	Oneida County
USA/NY-Wadsworth-226476-01/2020	GR	30	20B	USA	USA	New York	New York	EPI_ISL_677111	Human	Masonic Medical Research Institute	B.1.1	3-7 days ago	North America	Female	Wadsworth Center, New York State Department.of Health		2020-08-22	Nathan Tucker et al	Herkimer County
USA/MS-CDC-6546/2020	GR	26	20B	USA	USA	Mississippi	Mississippi	EPI_ISL_648005	Human	MS Public Health Laboratory	B.1.1	One month ago	North America	Male	Pathogen Discovery, Respiratory Viruses Branch, Division of Viral Diseases, Centers for Disease Control and Prevention		2020-08-25	Yan Li et al B		MW279423.1
USA/VA-DCLS-1651/2020	GR		20B	USA	USA	Virginia	Virginia	EPI_ISL_644826	Human	Virginia DCLS	B.1.1.55	One month ago	North America		Virginia DCLS		2020-08-28	Virginia DCLS et al		MW280471.1
USA/MS-CDC-6549/2020	GR	23	20B	USA	USA	Mississippi	Mississippi	EPI_ISL_648006	Human	MS Public Health Laboratory	B.1.1	One month ago	North America	Male	Pathogen Discovery, Respiratory Viruses Branch, Division of Viral Diseases, Centers for Disease Control and Prevention		2020-08-28	Yan Li et al B		MW279424.1
USA/OR-OHSU-2861/2020	GR	30	20B	USA	USA	Oregon	Oregon	EPI_ISL_667364	Human	OHSU Lab Services Molecular Microbiology Lab	B.1.1	3-7 days ago	North America	Male	Oregon SARS-CoV-2 Genome Sequencing Center		2020-09-03	Brendan L. O'Connell et al	Multnomah County
USA/GA-CDC-5527/2020	GR		20B	USA	USA	Georgia	Georgia	EPI_ISL_647989	Human	GA Department of Public Health Laboratory	B.1.1	One month ago	North America		Pathogen Discovery, Respiratory Viruses Branch, Division of Viral Diseases, Centers for Disease Control and Prevention		2020-09-03	Yan Li et al B		MW279419.1
USA/MS-CDC-6556/2020	GR	91	20B	USA	USA	Mississippi	Mississippi	EPI_ISL_648040	Human	MS Public Health Laboratory	B.1.1	One month ago	North America	Female	Pathogen Discovery, Respiratory Viruses Branch, Division of Viral Diseases, Centers for Disease Control and Prevention		2020-09-03	Yan Li et al B		MW279458.1
Canada/UN-CRCHUM-PreFreeze-10/2020	GR		20B	Canada	Canada	Canada	Canada	EPI_ISL_667767	Human	Microbiology, Infectious Diseases and Immunology, Centre de Recherche du Centre Hospitalier de l'Universite de Montreal	B.1.1.55	One week ago	North America		Microbiology, Infectious Diseases and Immunology, Centre de Recherche du Centre Hospitalier de l'Universite de Montreal		2020-09-04	Benoit et al
Canada/UN-CRCHUM-PreFreeze-2/2020	GR		20B	Canada	Canada	Canada	Canada	EPI_ISL_667759	Human	Microbiology, Infectious Diseases and Immunology, Centre de Recherche du Centre Hospitalier de l'Universite de Montreal	B.1.1	One week ago	North America		Microbiology, Infectious Diseases and Immunology, Centre de Recherche du Centre Hospitalier de l'Universite de Montreal		2020-09-04	Benoit et al
Canada/UN-CRCHUM-PostFreeze-2/2020	GR		20B	Canada	Canada	Canada	Canada	EPI_ISL_667769	Human	Microbiology, Infectious Diseases and Immunology, Centre de Recherche du Centre Hospitalier de l'Universite de Montreal	B.1.1	One week ago	North America		Microbiology, Infectious Diseases and Immunology, Centre de Recherche du Centre Hospitalier de l'Universite de Montreal		2020-09-04	Benoit et al
Mexico/GRO-InDRE-93/2020	GR	47	20B	Mexico	Mexico	Guerrero	Guerrero	EPI_ISL_658901	Human	Instituto de Diagnostico y Referencia Epidemiologicos (INDRE)	B.1.1	One week ago	North America	Female	Instituto de Diagnostico y Referencia Epidemiologicos (INDRE)		2020-09-07	Ernesto Ramirez-Gonzalez et al
USA/AZ-OHSU-2984/2020	GR		20B	USA	USA	Arizona	Arizona	EPI_ISL_667448	Human	OHSU Lab Services Molecular Microbiology Lab	B.1.1	3-7 days ago	North America	Female	Oregon SARS-CoV-2 Genome Sequencing Center		2020-09-09	Brendan L. O'Connell et al	Maricopa County
USA/VA-DCLS-1752/2020	GR		20B	USA	USA	Virginia	Virginia	EPI_ISL_644852	Human	Virginia DCLS	B.1.1	One month ago	North America		Virginia DCLS		2020-09-10	Virginia DCLS et al		MW280494.1
USA/IA-GMF-21220/2020	GR		20B	USA	USA	Iowa	Iowa	EPI_ISL_660829	Human	Gundersen Molecular Diagnostics Laboratory	B.1.1.73	One week ago	North America		Kabara Cancer Research Institute		2020-09-19	Craig S. Richmond et al A
USA/UT-UPHL-201110826/2020	GR		20B	USA	USA	Utah	Utah	EPI_ISL_628935	Human	Utah Public Health Laboratory	B.1.1	One month ago	North America		Utah Public Health Laboratory		2020-09-23	Erin Young et al		MW241375.1
USA/UT-UPHL-201119442/2020	GR		20B	USA	USA	Utah	Utah	EPI_ISL_628941	Human	Utah Public Health Laboratory	B.1.1	One month ago	North America		Utah Public Health Laboratory		2020-09-28	Erin Young et al		MW241381.1
Canada/ON-UHTC-0360/2020	GR		20B	Canada	Canada	Ontario	Ontario	EPI_ISL_671663	Human	Unity Health Toronto	B.1.1.32	3-7 days ago	North America		Ontario Institute for Cancer Research		2020-09-30	Ramzi Fattouh et al
USA/NY-NYCPHL-000974/2020	GR	44	20B	USA	USA	New York	New York	EPI_ISL_633004	Human	DOHMH Jamaica	B.1.1	One month ago	North America	Male	New York City Public Health Laboratory		2020-09-30	Jade Wang et al	New York City
Canada/ON-UHTC-0363/2020	GR		20B	Canada	Canada	Ontario	Ontario	EPI_ISL_671655	Human	Unity Health Toronto	B.1.1.32	3-7 days ago	North America		Ontario Institute for Cancer Research		2020-10-01	Ramzi Fattouh et al
Canada/ON-UHTC-0362/2020	GR		20B	Canada	Canada	Ontario	Ontario	EPI_ISL_671652	Human	Unity Health Toronto	B.1.1	3-7 days ago	North America		Ontario Institute for Cancer Research		2020-10-01	Ramzi Fattouh et al
Canada/ON-UHTC-0370/2020	GR		20B	Canada	Canada	Ontario	Ontario	EPI_ISL_671662	Human	Unity Health Toronto	B.1.1	3-7 days ago	North America		Ontario Institute for Cancer Research		2020-10-01	Ramzi Fattouh et al
USA/OR-OHSU-3079/2020	GR	37	20B	USA	USA	Oregon	Oregon	EPI_ISL_667472	Human	OHSU Lab Services Molecular Microbiology Lab	B.1.1	3-7 days ago	North America	Female	Oregon SARS-CoV-2 Genome Sequencing Center		2020-10-01	Brendan L. O'Connell et al	Washington County OR
USA/NY-NYCPHL-000979/2020	GR	40	20B	USA	USA	New York	New York	EPI_ISL_633007	Human	DOHMH Jamaica	B.1.1	One month ago	North America	Female	New York City Public Health Laboratory		2020-10-01	Jade Wang et al	New York City
USA/OR-OHSU-3119/2020	GR	18	20B	USA	USA	Oregon	Oregon	EPI_ISL_667489	Human	OHSU Lab Services Molecular Microbiology Lab	B.1.1	3-7 days ago	North America	Male	Oregon SARS-CoV-2 Genome Sequencing Center		2020-10-02	Brendan L. O'Connell et al	Columbia County OR
USA/IL-UW-2119/2020	GR		20B	USA	USA	Illinois	Illinois	EPI_ISL_677524	Human	University of Wisconsin-Madison AIDS Vaccine Research Laboratories	B.1.1	3-7 days ago	North America		University of Wisconsin-Madison AIDS Vaccine Research Laboratories		2020-10-02	Gage Moreno et al A	Winnebago County IL
USA/WI-GMF-23744/2020	GR		20B	USA	USA	Wisconsin	Wisconsin	EPI_ISL_660881	Human	Gundersen Clinical Microbiology Laboratory	B.1.1	One week ago	North America		Kabara Cancer Research Institute		2020-10-03	Craig S. Richmond et al A	Vernon County
Canada/ON-UHTC-0376/2020	GR		20B	Canada	Canada	Ontario	Ontario	EPI_ISL_671659	Human	Unity Health Toronto	B.1.1	3-7 days ago	North America		Ontario Institute for Cancer Research		2020-10-04	Ramzi Fattouh et al
Canada/ON-UHTC-0377/2020	GR		20B	Canada	Canada	Ontario	Ontario	EPI_ISL_671667	Human	Unity Health Toronto	B.1.1	3-7 days ago	North America		Ontario Institute for Cancer Research		2020-10-04	Ramzi Fattouh et al
Canada/ON-UHTC-0374/2020	GR		20B	Canada	Canada	Ontario	Ontario	EPI_ISL_671658	Human	Unity Health Toronto	B.1.1	3-7 days ago	North America		Ontario Institute for Cancer Research		2020-10-04	Ramzi Fattouh et al
USA/OR-OHSU-3179/2020	GR	29	20B	USA	USA	Oregon	Oregon	EPI_ISL_667500	Human	OHSU Lab Services Molecular Microbiology Lab	B.1.1	3-7 days ago	North America	Male	Oregon SARS-CoV-2 Genome Sequencing Center		2020-10-05	Brendan L. O'Connell et al	Washington County OR
USA/WI-UW-2132/2020	GR		20B	USA	USA	Illinois	Illinois	EPI_ISL_677537	Human	University of Wisconsin-Madison AIDS Vaccine Research Laboratories	B.1.1	3-7 days ago	North America		University of Wisconsin-Madison AIDS Vaccine Research Laboratories		2020-10-05	Gage Moreno et al A	Ogle County
USA/CO-CDPHE-2010200546/2020	GR		20B	USA	USA	Colorado	Colorado	EPI_ISL_677318	Human	Colorado Department of Public Health and Environment	B.1.1	3-7 days ago	North America		Colorado Department of Puplic Health and Environment		2020-10-19	Laura Bankers et al
USA/NY-NYCPHL-001118/2020	GR	24	20B	USA	USA	Georgia	Georgia	EPI_ISL_671701	Human	DOHMH Riverside	B.1.1	3-7 days ago	North America	Male	New York City Public Health Laboratory		2020-10-21	Jade Wang et al	Atlanta
USA/MI-UM-10036628929/2020	GR		20B	USA	USA	Michigan	Michigan	EPI_ISL_650027	Human	University of Michigan Clinical Microbiology Laboratory	B.1.1	One month ago	North America		Lauring Lab, University of Michigan, Department of Microbiology and Immunology		2020-10-26	Valesano et al
USA/NY-NYCPHL-001149/2020	GR	26	20B	USA	USA	New York	New York	EPI_ISL_671731	Human	DOHMH Corona	B.1.1	3-7 days ago	North America	Male	New York City Public Health Laboratory		2020-10-26	Jade Wang et al	New York City
USA/NY-NYCPHL-001161/2020	GR	47	20B	USA	USA	New York	New York	EPI_ISL_671741	Human	DOHMH Morrisania	B.1.1	3-7 days ago	North America	Male	New York City Public Health Laboratory		2020-10-28	Jade Wang et al	New York City
USA/NY-NYCPHL-001174/2020	GR	26	20B	USA	USA	New York	New York	EPI_ISL_671754	Human	DOHMH Morrisania	B.1.1	3-7 days ago	North America	Male	New York City Public Health Laboratory		2020-10-29	Jade Wang et al	New York City
USA/MN-MDH-2000/2020	GR		20B	USA	USA	Minnesota	Minnesota	EPI_ISL_634874	Human	Minnesota Department of Health, Public Health Laboratory	B.1.1	One month ago	North America		Minnesota Department of Health, Public Health Laboratory		2020-10-29	Matt Plumb et al		MW246593.1
USA/NY-NYCPHL-001181/2020	GR	26	20B	USA	USA	New York	New York	EPI_ISL_671760	Human	DOHMH Crown Heights	B.1.1.44	3-7 days ago	North America	Female	New York City Public Health Laboratory		2020-10-30	Jade Wang et al	New York City
USA/CA-CZB-13336/2020	GR		20B	USA	USA	California	California	EPI_ISL_672438	Human	Santa Clara County Public Health Laboratory	B.1.1	3-7 days ago	North America		Chan-Zuckerberg Biohub		2020-11-02	CZB Cliahub Consortium et al B	Santa Clara County
Mexico/AGS-InDRE-78/2020	GR	45	20B	Mexico	Mexico	Aguascalientes	Aguascalientes	EPI_ISL_658863	Human	Instituto de Diagnostico y Referencia Epidemiologicos (INDRE)	B.1.1	One week ago	North America	Female	Instituto de Diagnostico y Referencia Epidemiologicos (INDRE)		2020-11-02	Gisela Barrera-Badillo et al
Mexico/AGS-InDRE-82/2020	GR	19	20B	Mexico	Mexico	Aguascalientes	Aguascalientes	EPI_ISL_658873	Human	Instituto de Diagnostico y Referencia Epidemiologicos (INDRE)	B.1.1	One week ago	North America	Female	Instituto de Diagnostico y Referencia Epidemiologicos (INDRE)		2020-11-02	Gisela Barrera-Badillo et al
Mexico/QRO-InDRE-90/2020	GR	46	20B	Mexico	Mexico	Queretaro	Queretaro	EPI_ISL_658893	Human	Instituto de Diagnostico y Referencia Epidemiologicos (INDRE)	B.1.1	One week ago	North America	Female	Instituto de Diagnostico y Referencia Epidemiologicos (INDRE)		2020-11-03	Ernesto Ramirez-Gonzalez et al
Mexico/QRO-InDRE-87/2020	GR	47	20B	Mexico	Mexico	Queretaro	Queretaro	EPI_ISL_658886	Human	Instituto de Diagnostico y Referencia Epidemiologicos (INDRE)	B.1.1.77	One week ago	North America	Female	Instituto de Diagnostico y Referencia Epidemiologicos (INDRE)		2020-11-03	Ernesto Ramirez-Gonzalez et al
USA/MN-MDH-2028/2020	GR		20B	USA	USA	Minnesota	Minnesota	EPI_ISL_654709	Human	Minnesota Department of Health, Public Health Laboratory	B.1.1.25	One week ago	North America		Minnesota Department of Health, Public Health Laboratory		2020-11-03	Matt Plumb et al		MW288265.1
USA/MN-MDH-2030/2020	GR		20B	USA	USA	Minnesota	Minnesota	EPI_ISL_654711	Human	Minnesota Department of Health, Public Health Laboratory	B.1.1	One week ago	North America		Minnesota Department of Health, Public Health Laboratory		2020-11-03	Matt Plumb et al		MW288267.1
USA/MN-MDH-2039/2020	GR		20B	USA	USA	Minnesota	Minnesota	EPI_ISL_654720	Human	Minnesota Department of Health, Public Health Laboratory	B.1.1	One week ago	North America		Minnesota Department of Health, Public Health Laboratory		2020-11-03	Matt Plumb et al		MW288276.1
USA/MN-MDH-2031/2020	GR		20B	USA	USA	Minnesota	Minnesota	EPI_ISL_654712	Human	Minnesota Department of Health, Public Health Laboratory	B.1.1	One week ago	North America		Minnesota Department of Health, Public Health Laboratory		2020-11-03	Matt Plumb et al		MW288268.1
USA/MN-MDH-2036/2020	GR		20B	USA	USA	Minnesota	Minnesota	EPI_ISL_654717	Human	Minnesota Department of Health, Public Health Laboratory	B.1.1	One week ago	North America		Minnesota Department of Health, Public Health Laboratory		2020-11-03	Matt Plumb et al		MW288273.1
USA/OR-OHSU-4446/2020	GR	29	20B	USA	USA	Oregon	Oregon	EPI_ISL_667537	Human	OHSU Lab Services Molecular Microbiology Lab	B.1.1	3-7 days ago	North America	Female	Oregon SARS-CoV-2 Genome Sequencing Center		2020-11-05	Brendan L. O'Connell et al
USA/MD-MDH-0417/2020	GR		20B	USA	USA	Maryland	Maryland	EPI_ISL_666787	Human	Maryland Public Health Laboratory	B.1.1	3-7 days ago	North America		Maryland Public Health Laboratory		2020-11-05	Maryland Department of Health Laboratories Administration et al		MW310429.1
USA/VA-DCLS-2185/2020	GR		20B	USA	USA	Virginia	Virginia	EPI_ISL_677211	Human	Virginia Division of Consolidated Laboratory Services	B.1.1.28	3-7 days ago	North America		Virginia Division of Consolidated Laboratory Services		2020-11-12	Virginia DCLS et al
USA/VA-DCLS-2187/2020	GR		20B	USA	USA	Virginia	Virginia	EPI_ISL_677212	Human	Virginia Division of Consolidated Laboratory Services	B.1.1.28	3-7 days ago	North America		Virginia Division of Consolidated Laboratory Services		2020-11-12	Virginia DCLS et al
Australia/VIC16435/2020	GR		20B	Australia	Australia	Victoria	Victoria	EPI_ISL_640323	Human	Microbiological Diagnostic Unit - Public Health Laboratory (MDU-PHL)	B.1.1	One month ago	Oceania	Female	MDU-PHL		2020-08-05	Seemann T. et al
Australia/NSW2692/2020	GR	28	20B	Australia	Australia	New South Wales	New South Wales	EPI_ISL_678336	Human	Area of Virology, Serology and Virology Division (SAViD), New South Wales Health Pathology Randwick	D.2	1-2 days ago	Oceania	Female	Virology Research Laboratory; Area of Virology, Serology and Virology Division (SAViD), New South Wales Health Pathology Randwick		2020-08-10	Foster et al	Sydney
Australia/VIC16774/2020	GR	37	20B	Australia	Australia	Victoria	Victoria	EPI_ISL_663576	Human	Microbiological Diagnostic Unit - Public Health Laboratory (MDU-PHL)	D.2	One week ago	Oceania	Female	MDU-PHL		2020-08-10	Seemann T. et al		MW320983.1
Australia/VIC16796/2020	GR	20	20B	Australia	Australia	Victoria	Victoria	EPI_ISL_663582	Human	Microbiological Diagnostic Unit - Public Health Laboratory (MDU-PHL)	D.2	One week ago	Oceania	Female	MDU-PHL		2020-08-11	Seemann T. et al		MW321104.1
Australia/VIC16978/2020	GR	57	20B	Australia	Australia	Victoria	Victoria	EPI_ISL_663294	Human	Microbiological Diagnostic Unit - Public Health Laboratory (MDU-PHL)	B.1.1	One week ago	Oceania	Male	MDU-PHL		2020-08-16	Seemann T. et al		MW321324.1
Australia/VIC16242/2020	GR		20B	Australia	Australia	Victoria	Victoria	EPI_ISL_641193	Human	Microbiological Diagnostic Unit - Public Health Laboratory (MDU-PHL)	D.2	One month ago	Oceania	Male	MDU-PHL		2020-09-06	Seemann T. et al
Australia/WA425/2020	GR		20B	Australia	Australia	Western Australia	Western Australia	EPI_ISL_672637	Human	PathWest Laboratory Medicine WA	B.1.1	3-7 days ago	Oceania		PathWest Laboratory Medicine WA Microbial Surveillance Unit		2020-09-15	PathWest Laboratory Medicine WA Microbial Surveillance Unit et al
Australia/NSW2760/2020	GR	5	20B	Australia	Australia	New South Wales	New South Wales	EPI_ISL_678343	Human	Area of Virology, Serology and Virology Division (SAViD), New South Wales Health Pathology Randwick	B.1.1	1-2 days ago	Oceania	Male	Virology Research Laboratory; Area of Virology, Serology and Virology Division (SAViD), New South Wales Health Pathology Randwick		2020-09-15	Foster et al	Sydney
Australia/WA436/2020	GR		20B	Australia	Australia	Western Australia	Western Australia	EPI_ISL_672648	Human	PathWest Laboratory Medicine WA	B.1.1.63	3-7 days ago	Oceania		PathWest Laboratory Medicine WA Microbial Surveillance Unit		2020-09-25	PathWest Laboratory Medicine WA Microbial Surveillance Unit et al
Australia/WA434/2020	GR		20B	Australia	Australia	Western Australia	Western Australia	EPI_ISL_672646	Human	PathWest Laboratory Medicine WA	B.1.1.63	3-7 days ago	Oceania		PathWest Laboratory Medicine WA Microbial Surveillance Unit		2020-09-25	PathWest Laboratory Medicine WA Microbial Surveillance Unit et al
Australia/WA432/2020	GR		20B	Australia	Australia	Western Australia	Western Australia	EPI_ISL_672644	Human	PathWest Laboratory Medicine WA	B.1.1.63	3-7 days ago	Oceania		PathWest Laboratory Medicine WA Microbial Surveillance Unit		2020-09-25	PathWest Laboratory Medicine WA Microbial Surveillance Unit et al
Australia/WA435/2020	GR		20B	Australia	Australia	Western Australia	Western Australia	EPI_ISL_672647	Human	PathWest Laboratory Medicine WA	B.1.1.63	3-7 days ago	Oceania		PathWest Laboratory Medicine WA Microbial Surveillance Unit		2020-09-25	PathWest Laboratory Medicine WA Microbial Surveillance Unit et al
Australia/WA438/2020	GR		20B	Australia	Australia	Western Australia	Western Australia	EPI_ISL_672650	Human	PathWest Laboratory Medicine WA	B.1.1.63	3-7 days ago	Oceania		PathWest Laboratory Medicine WA Microbial Surveillance Unit		2020-09-26	PathWest Laboratory Medicine WA Microbial Surveillance Unit et al
Australia/WA440/2020	GR		20B	Australia	Australia	Western Australia	Western Australia	EPI_ISL_672652	Human	PathWest Laboratory Medicine WA	B.1.1.63	3-7 days ago	Oceania		PathWest Laboratory Medicine WA Microbial Surveillance Unit		2020-09-26	PathWest Laboratory Medicine WA Microbial Surveillance Unit et al
Australia/NSW2821/2020	GR	55	20B	Australia	Australia	New South Wales	New South Wales	EPI_ISL_678351	Human	Area of Virology, Serology and Virology Division (SAViD), New South Wales Health Pathology Randwick	B.1.1	1-2 days ago	Oceania	Male	Virology Research Laboratory; Area of Virology, Serology and Virology Division (SAViD), New South Wales Health Pathology Randwick		2020-09-28	Foster et al	Sydney
Australia/NSW1159/2020	GR		20B	Australia	Australia	New South Wales	New South Wales	EPI_ISL_629030	Human	South Eastern Area Laboratory Services (SEALS)	B.1.1	One month ago	Oceania		NSW Health Pathology - Institute of Clinical Pathology and Medical Research; Westmead Hospital; University of Sydney		2020-09-28	CIDM-PH et al. et al	Sydney
Australia/VIC16198/2020	GR		20B	Australia	Australia	Victoria	Victoria	EPI_ISL_640337	Human	Victorian Infectious Diseases Reference Laboratory (VIDRL)	B.1.1	One month ago	Oceania	Female	VIDRL and MDU-PHL		2020-10-03	Caly L. et al A
Australia/VIC16197/2020	GR		20B	Australia	Australia	Victoria	Victoria	EPI_ISL_640519	Human	Victorian Infectious Diseases Reference Laboratory (VIDRL)	D.2	One month ago	Oceania	Female	VIDRL and MDU-PHL		2020-10-03	Caly L. et al A
Australia/VIC16219/2020	GR	38	20B	Australia	Australia	Victoria	Victoria	EPI_ISL_640754	Human	Microbiological Diagnostic Unit - Public Health Laboratory (MDU-PHL)	D.2	One month ago	Oceania	Female	MDU-PHL		2020-10-05	Seemann T. et al
Australia/NSW2899/2020	GR	54	20B	Australia	Australia	New South Wales	New South Wales	EPI_ISL_678363	Human	Area of Virology, Serology and Virology Division (SAViD), New South Wales Health Pathology Randwick	B.1.1	1-2 days ago	Oceania	Female	Virology Research Laboratory; Area of Virology, Serology and Virology Division (SAViD), New South Wales Health Pathology Randwick		2020-10-06	Foster et al	Sydney
Australia/NSW1150/2020	GR		20B	Australia	Australia	New South Wales	New South Wales	EPI_ISL_629003	Human	South Eastern Area Laboratory Services (SEALS)	B.1.1	One month ago	Oceania		NSW Health Pathology - Institute of Clinical Pathology and Medical Research; Westmead Hospital; University of Sydney		2020-10-06	CIDM-PH et al. et al	Sydney
Australia/VIC15880/2020	GR	36	20B	Australia	Australia	Victoria	Victoria	EPI_ISL_641177	Human	Microbiological Diagnostic Unit - Public Health Laboratory (MDU-PHL)	D.2	One month ago	Oceania	Male	MDU-PHL		2020-10-08	Seemann T. et al
Australia/VIC16215/2020	GR		20B	Australia	Australia	Victoria	Victoria	EPI_ISL_641050	Human	Microbiological Diagnostic Unit - Public Health Laboratory (MDU-PHL)	D.2	One month ago	Oceania	Female	MDU-PHL		2020-10-08	Seemann T. et al
Australia/VIC15878/2020	GR		20B	Australia	Australia	Victoria	Victoria	EPI_ISL_640543	Human	Microbiological Diagnostic Unit - Public Health Laboratory (MDU-PHL)	B.1.1	One month ago	Oceania	Female	MDU-PHL		2020-10-10	Seemann T. et al
Australia/VIC16098/2020	GR	28	20B	Australia	Australia	Victoria	Victoria	EPI_ISL_640978	Human	Microbiological Diagnostic Unit - Public Health Laboratory (MDU-PHL)	B.1.1	One month ago	Oceania	Female	MDU-PHL		2020-10-11	Seemann T. et al
Australia/VIC16192/2020	GR	53	20B	Australia	Australia	Victoria	Victoria	EPI_ISL_641017	Human	Victorian Infectious Diseases Reference Laboratory (VIDRL)	B.1.1	One month ago	Oceania	Male	VIDRL and MDU-PHL		2020-10-13	Caly L. et al A
Australia/VIC16302/2020	GR	31	20B	Australia	Australia	Victoria	Victoria	EPI_ISL_641214	Human	Microbiological Diagnostic Unit - Public Health Laboratory (MDU-PHL)	D.2	One month ago	Oceania	Female	MDU-PHL		2020-10-13	Seemann T. et al
Australia/NSW1168/2020	GR		20B	Australia	Australia	New South Wales	New South Wales	EPI_ISL_639736	Human	South Eastern Area Laboratory Services (SEALS)	B.1.1	One month ago	Oceania		NSW Health Pathology - Institute of Clinical Pathology and Medical Research; Westmead Hospital; University of Sydney		2020-10-21	CIDM-PH et al. et al	Sydney
Australia/NSW1178/2020	GR		20B	Australia	Australia	New South Wales	New South Wales	EPI_ISL_667782	Human	South Eastern Area Laboratory Services (SEALS)	B.1.1	3-7 days ago	Oceania		NSW Health Pathology - Institute of Clinical Pathology and Medical Research; Westmead Hospital; University of Sydney		2020-10-24	CIDM-PH et al. et al	Sydney
Australia/NSW1154/2020	GR		20B	Australia	Australia	New South Wales	New South Wales	EPI_ISL_629007	Human	Laverty Pathology	D.2	One month ago	Oceania		NSW Health Pathology - Institute of Clinical Pathology and Medical Research; Westmead Hospital; University of Sydney		2020-10-25	CIDM-PH et al. et al	Sydney
Australia/QLD1231/2020	GR		20B	Australia	Australia	Australia	Australia	EPI_ISL_639819	Human		B.1.1.67	One month ago	Oceania		Public Health Virology Laboratory, Forensic and Scientific Services (PHV-FSS)		2020-10-29	Son Nguyen et al. et al
NewZealand/20CV0517/2020	GR		20B	New Zealand	New Zealand	Auckland	Auckland	EPI_ISL_626355	Human	LabPLUS	B.1.1.60	One month ago	Oceania	Male	Institute of Environmental Science and Research (ESR)		2020-10-29	Xiaoyun Ren et al
Australia/NSW1167/2020	GR		20B	Australia	Australia	New South Wales	New South Wales	EPI_ISL_639735	Human	Sydney South West Pathology Service (SSWPS) - Liverpool Hospital - NSW Health Pathology	D.2	One month ago	Oceania		NSW Health Pathology - Institute of Clinical Pathology and Medical Research; Westmead Hospital; University of Sydney		2020-11-02	CIDM-PH et al. et al	Sydney
Australia/NSW1166/2020	GR		20B	Australia	Australia	New South Wales	New South Wales	EPI_ISL_639734	Human	Sydney South West Pathology Service (SSWPS) - Liverpool Hospital - NSW Health Pathology	D.2	One month ago	Oceania		NSW Health Pathology - Institute of Clinical Pathology and Medical Research; Westmead Hospital; University of Sydney		2020-11-02	CIDM-PH et al. et al	Sydney
Australia/NSW1208/2020	GR		20B	Australia	Australia	New South Wales	New South Wales	EPI_ISL_667806	Human	South Eastern Area Laboratory Services (SEALS)	B.1.1.25	3-7 days ago	Oceania		NSW Health Pathology - Institute of Clinical Pathology and Medical Research; Westmead Hospital; University of Sydney		2020-11-03	CIDM-PH et al. et al	Sydney
NewZealand/20CV0550/2020	GR		20B	New Zealand	New Zealand	Auckland	Auckland	EPI_ISL_649121	Human	Middlemore Hospital	B.1.1	One month ago	Oceania	Male	Institute of Environmental Science and Research (ESR)		2020-11-12	Xiaoyun Ren et al	Counties Manukau
Australia/NSW1217/2020	GR		20B	Australia	Australia	New South Wales	New South Wales	EPI_ISL_672661	Human	South Eastern Area Laboratory Services (SEALS)	B.1.1	3-7 days ago	Oceania		NSW Health Pathology - Institute of Clinical Pathology and Medical Research; Westmead Hospital; University of Sydney		2020-11-13	CIDM-PH et al. et al	Sydney
Australia/SAP550/2020	GR	42	20B	Australia	Australia	South Australia	South Australia	EPI_ISL_654797	Human	SA Pathology	B.1.1	One week ago	Oceania	Male	SA Pathology		2020-11-14	Lex Leong et al
Australia/SAP551/2020	GR	15	20B	Australia	Australia	South Australia	South Australia	EPI_ISL_654798	Human	SA Pathology	B.1.1	One week ago	Oceania	Female	SA Pathology		2020-11-14	Lex Leong et al
NewZealand/20CV0587/2020	GR		20B	New Zealand	New Zealand	Auckland	Auckland	EPI_ISL_661261	Human	LabPLUS	B.1.1	One week ago	Oceania	Female	Institute of Environmental Science and Research (ESR)		2020-11-20	Xiaoyun Ren et al
Australia/NSW3456/2020	GR	12	20B	Australia	Australia	New South Wales	New South Wales	EPI_ISL_678386	Human	Area of Virology, Serology and Virology Division (SAViD), New South Wales Health Pathology Randwick	B.1.1.49	1-2 days ago	Oceania	Male	Virology Research Laboratory; Area of Virology, Serology and Virology Division (SAViD), New South Wales Health Pathology Randwick		2020-11-30	Foster et al	Sydney
Brazil/SP-L25-CD648/2020	GR	25	20B	Brazil	Brazil	S√£o Paulo	S√£o Paulo	EPI_ISL_672712	Human	Institute of Tropical Medicine at the University of S√£o Paulo (IMT-USP)	B.1.1.33	3-7 days ago	South America	Male	Laborat√≥rio de Parasitologia M√©dica - Instituto de Medicina Tropical - Universidade de S√£o Paulo		2020-04-11	Brazil-UK Centre for Arbovirus Discovery Diagnosis Genomics et al
Chile/RM-CMM-0096M/2020	GR		20B	Chile	Chile	Region Metropolitana de Santiago	Region Metropolitana de Santiago	EPI_ISL_629022	Human	Centro de Biotecnolog√≠a Vegetal, Universidad Andr√©s Bello, Center for Genome Regulation	B.1.1.33	One month ago	South America		Center for Mathematical Modeling and Center for Genome Regulation. Santiago, Chile		2020-05-02	Bastias M et al	Santiago
Chile/AT-CMM-ATAC06/2020	GR		20B	Chile	Chile	Atacama	Atacama	EPI_ISL_626552	Human	Laboratorio de Biolog√≠a Molecular, Facultad de Medicina, Universidad de Atacama, Copiapo, Chile/ FONDAP CRG, Universidad Andr√©s Bello, Santiago, Chile	B.1.1.33	One month ago	South America	Female	Center for Mathematical Modeling and Center for Genome Regulation. Santiago, Chile		2020-07-22	Echeverr√≠a C et al	Tierra Amarilla
Chile/AT-CMM-ATAC09/2020	GR		20B	Chile	Chile	Atacama	Atacama	EPI_ISL_626555	Human	Laboratorio de Biolog√≠a Molecular, Facultad de Medicina, Universidad de Atacama, Copiapo, Chile/ FONDAP CRG, Universidad Andr√©s Bello, Santiago, Chile	B.1.1.33	One month ago	South America	Female	Center for Mathematical Modeling and Center for Genome Regulation. Santiago, Chile		2020-07-25	Echeverr√≠a C et al	Paipote
Chile/AT-CMM-ATAC20/2020	GR		20B	Chile	Chile	Atacama	Atacama	EPI_ISL_626565	Human	Laboratorio de Biolog√≠a Molecular, Facultad de Medicina, Universidad de Atacama, Copiapo, Chile/ FONDAP CRG, Universidad Andr√©s Bello, Santiago, Chile	B.1.1.33	One month ago	South America	Male	Center for Mathematical Modeling and Center for Genome Regulation. Santiago, Chile		2020-07-26	Echeverr√≠a C et al	Copiapo
Chile/AT-CMM-ATAC19/2020	GR		20B	Chile	Chile	Atacama	Atacama	EPI_ISL_626564	Human	Laboratorio de Biolog√≠a Molecular, Facultad de Medicina, Universidad de Atacama, Copiapo, Chile/ FONDAP CRG, Universidad Andr√©s Bello, Santiago, Chile	B.1.1.33	One month ago	South America	Male	Center for Mathematical Modeling and Center for Genome Regulation. Santiago, Chile		2020-07-30	Echeverr√≠a C et al	Copiapo
Chile/AT-CMM-ATAC11/2020	GR		20B	Chile	Chile	Atacama	Atacama	EPI_ISL_626557	Human	Laboratorio de Biolog√≠a Molecular, Facultad de Medicina, Universidad de Atacama, Copiapo, Chile/ FONDAP CRG, Universidad Andr√©s Bello, Santiago, Chile	B.1.1.33	One month ago	South America	Male	Center for Mathematical Modeling and Center for Genome Regulation. Santiago, Chile		2020-08-07	Echeverr√≠a C et al	Caldera
Chile/AT-CMM-ATAC10/2020	GR		20B	Chile	Chile	Atacama	Atacama	EPI_ISL_626556	Human	Laboratorio de Biolog√≠a Molecular, Facultad de Medicina, Universidad de Atacama, Copiapo, Chile/ FONDAP CRG, Universidad Andr√©s Bello, Santiago, Chile	B.1.1.33	One month ago	South America	Male	Center for Mathematical Modeling and Center for Genome Regulation. Santiago, Chile		2020-08-07	Echeverr√≠a C et al	Caldera
Chile/AT-CMM-ATAC13/2020	GR		20B	Chile	Chile	Atacama	Atacama	EPI_ISL_626559	Human	Laboratorio de Biolog√≠a Molecular, Facultad de Medicina, Universidad de Atacama, Copiapo, Chile/ FONDAP CRG, Universidad Andr√©s Bello, Santiago, Chile	B.1.1.33	One month ago	South America	Female	Center for Mathematical Modeling and Center for Genome Regulation. Santiago, Chile		2020-08-07	Echeverr√≠a C et al	Caldera
Aruba/AW-RIVM-10391/2020	GR		20B	Aruba	Aruba	Aruba	Aruba	EPI_ISL_636517	Human	Dutch COVID-19 response team	B.1.1	One month ago	South America		National Institute for Public Health and the Environment (RIVM)		2020-08-07	Adam Meijer et al
Chile/AT-CMM-ATAC16/2020	GR		20B	Chile	Chile	Atacama	Atacama	EPI_ISL_626562	Human	Laboratorio de Biolog√≠a Molecular, Facultad de Medicina, Universidad de Atacama, Copiapo, Chile/ FONDAP CRG, Universidad Andr√©s Bello, Santiago, Chile	B.1.1	One month ago	South America	Female	Center for Mathematical Modeling and Center for Genome Regulation. Santiago, Chile		2020-08-07	Echeverr√≠a C et al	Freirina
Chile/AT-CMM-ATAC18/2020	GR		20B	Chile	Chile	Atacama	Atacama	EPI_ISL_626563	Human	Laboratorio de Biolog√≠a Molecular, Facultad de Medicina, Universidad de Atacama, Copiapo, Chile/ FONDAP CRG, Universidad Andr√©s Bello, Santiago, Chile	B.1.1	One month ago	South America	Male	Center for Mathematical Modeling and Center for Genome Regulation. Santiago, Chile		2020-08-07	Echeverr√≠a C et al	Freirina
Chile/AT-CMM-ATAC14/2020	GR		20B	Chile	Chile	Atacama	Atacama	EPI_ISL_626560	Human	Laboratorio de Biolog√≠a Molecular, Facultad de Medicina, Universidad de Atacama, Copiapo, Chile/ FONDAP CRG, Universidad Andr√©s Bello, Santiago, Chile	B.1.1	One month ago	South America	Female	Center for Mathematical Modeling and Center for Genome Regulation. Santiago, Chile		2020-08-07	Echeverr√≠a C et al	El Salvador
Chile/MA-UMAG-Catg-2/2020	GR		20B	Chile	Chile	Magallanes	Magallanes	EPI_ISL_625681	Human	Laboratory of Molecular Medicine, University of Magallanes	B.1.1.1	One month ago	South America		Centro Asistencial Docente y de Investigacion, Universidad de Magallanes		2020-08-10	Jorge Gonzalez et al	Porvenir
Chile/MA-UMAG-Catg-3/2020	GR		20B	Chile	Chile	Magallanes	Magallanes	EPI_ISL_625682	Human	Laboratory of Molecular Medicine, University of Magallanes	B.1.1.1	One month ago	South America		Centro Asistencial Docente y de Investigacion, Universidad de Magallanes		2020-08-10	Jorge Gonzalez et al	Porvenir
Chile/AT-CMM-ATAC12/2020	GR		20B	Chile	Chile	Atacama	Atacama	EPI_ISL_626558	Human	Laboratorio de Biolog√≠a Molecular, Facultad de Medicina, Universidad de Atacama, Copiapo, Chile/ FONDAP CRG, Universidad Andr√©s Bello, Santiago, Chile	B.1.1.33	One month ago	South America	Female	Center for Mathematical Modeling and Center for Genome Regulation. Santiago, Chile		2020-08-10	Echeverr√≠a C et al	Copiapo
Colombia/ATL-INS-10/2020	GR	85	20B	Colombia	Colombia	Atlantico	Atlantico	EPI_ISL_653762	Human	Instituto Nacional de Salud, Bogot√°, Colombia	B.1.1.30	One month ago	South America	Male	Instituto Nacional de Salud, Bogot√°, Colombia		2020-08-20	Katherine Laiton-Donato et al A	Barranquilla
Chile/MA-UMAG-Catg-19/2020	GR		20B	Chile	Chile	Magallanes	Magallanes	EPI_ISL_625680	Human	Laboratory of Molecular Medicine, University of Magallanes	B.1.1.1	One month ago	South America		Centro Asistencial Docente y de Investigacion, Universidad de Magallanes		2020-08-25	Jorge Gonzalez et al	Punta Arenas
Chile/MA-UMAG-Catg-7/2020	GR		20B	Chile	Chile	Magallanes	Magallanes	EPI_ISL_625675	Human	Laboratory of Molecular Medicine, University of Magallanes	B.1.1.1	One month ago	South America		Centro Asistencial Docente y de Investigacion, Universidad de Magallanes		2020-09-03	Jorge Gonzalez et al	Porvenir
Chile/MA-UMAG-Catg-20/2020	GR		20B	Chile	Chile	Magallanes	Magallanes	EPI_ISL_625676	Human	Laboratory of Molecular Medicine, University of Magallanes	B.1.1.1	One month ago	South America		Centro Asistencial Docente y de Investigacion, Universidad de Magallanes		2020-09-08	Jorge Gonzalez et al	Punta Arenas
Chile/MA-UMAG-Catg-5/2020	GR		20B	Chile	Chile	Magallanes	Magallanes	EPI_ISL_625673	Human	Laboratory of Molecular Medicine, University of Magallanes	B.1.1.1	One month ago	South America		Centro Asistencial Docente y de Investigacion, Universidad de Magallanes		2020-09-17	Jorge Gonzalez et al	Puerto Natales
Chile/MA-UMAG-Catg-21/2020	GR		20B	Chile	Chile	Magallanes	Magallanes	EPI_ISL_625677	Human	Laboratory of Molecular Medicine, University of Magallanes	B.1.1.35	One month ago	South America		Centro Asistencial Docente y de Investigacion, Universidad de Magallanes		2020-09-19	Jorge Gonzalez et al	Punta Arenas
Chile/MA-UMAG-Catg-6/2020	GR		20B	Chile	Chile	Magallanes	Magallanes	EPI_ISL_625674	Human	Laboratory of Molecular Medicine, University of Magallanes	B.1.1.1	One month ago	South America		Centro Asistencial Docente y de Investigacion, Universidad de Magallanes		2020-09-27	Jorge Gonzalez et al	Puerto Natales
Ecuador/USFQ-230/2020	GR	25	20B	Ecuador	Ecuador	Tungurahua	Tungurahua	EPI_ISL_660530	Human	Institute of Microbiology, Universidad San Francisco de Quito	B.1.1.10	One week ago	South America	Female	Institute of Microbiology, Universidad San Francisco de Quito		2020-10-01	Sully M√°rquez et al	Ambato
Ecuador/USFQ-228/2020	GR	58	20B	Ecuador	Ecuador	Tungurahua	Tungurahua	EPI_ISL_660529	Human	Institute of Microbiology, Universidad San Francisco de Quito	B.1.1	One week ago	South America	Male	Institute of Microbiology, Universidad San Francisco de Quito		2020-10-01	Sully M√°rquez et al	Ambato
Ecuador/USFQ-520/2020	GR		20B	Ecuador	Ecuador	Pastaza	Pastaza	EPI_ISL_660539	Human	Institute of Microbiology, Universidad San Francisco de Quito	B.1.1.10	One week ago	South America		Institute of Microbiology, Universidad San Francisco de Quito		2020-10-02	Sully M√°rquez et al	Puyo
Chile/MA-UMAG-Catg-4/2020	GR		20B	Chile	Chile	Magallanes	Magallanes	EPI_ISL_625678	Human	Laboratory of Molecular Medicine, University of Magallanes	B.1.1.1	One month ago	South America		Centro Asistencial Docente y de Investigacion, Universidad de Magallanes		2020-10-09	Jorge Gonzalez et al	Puerto Williams
Chile/MA-UMAG-Catg-5-2/2020	GR		20B	Chile	Chile	Magallanes	Magallanes	EPI_ISL_625679	Human	Laboratory of Molecular Medicine, University of Magallanes	B.1.1.1	One month ago	South America		Centro Asistencial Docente y de Investigacion, Universidad de Magallanes		2020-10-09	Jorge Gonzalez et al	Puerto Williams
Ecuador/USFQ-513/2020	GR	81	20B	Ecuador	Ecuador	El Oro	El Oro	EPI_ISL_660537	Human	Institute of Microbiology, Universidad San Francisco de Quito	B.1.1.35	One week ago	South America	Male	Institute of Microbiology, Universidad San Francisco de Quito		2020-10-10	Sully M√°rquez et al	Machala
Tunisia/55400/2020	GV	40	20A	Tunisia	Tunisia	Nabeul	Nabeul	EPI_ISL_635061	Human	1-Laboratory of Microbiology, National Reference Lab, Charles Nicolle Hospital; 2-University of Tunis ElManar, Faculty of Medicine of Tunis, LR99ES09, Tunis, Tunisia	B.1.177	One month ago	Africa	Female	1-Clinical and Experimental Pharmacology Lab, LR16SP02, National Center of Pharmacovigilance, University of Tunis El Manar, Tunis, Tunisia. 2-Neurodegenerative diseases and psychiatric troubles, LR18SP03, Razi Hospital, University of Tunis El Manar, Tunis, Tunisia. 3- Ministry of Health, National Observatory of New and Emerging Diseases, 1006, Tunis, Tunisia		2020-11-02	Ilhem Boutiba-Ben Boubaker et al
Tunisia/55262/2020	GV	42	20A	Tunisia	Tunisia	Nabeul	Nabeul	EPI_ISL_654017	Human	Laboratory of Microbiology, National Reference Lab, Charles Nicolle Hospital; 2-University of Tunis ElManar, Faculty of Medicine of Tunis, LR99ES09, Tunis, Tunisia	B.1.177	One week ago	Africa	Female	1-Clinical and Experimental Pharmacology Lab, LR16SP02, National Center of Pharmacovigilance, University of Tunis El Manar, Tunis, Tunisia. 2-Neurodegenerative diseases and psychiatric troubles, LR18SP03, Razi Hospital, University of Tunis El Manar, Tunis, Tunisia. 3- Ministry of Health, National Observatory of New and Emerging Diseases, 1006, Tunis, Tunisia		2020-11-02	Ilhem Boutiba-Ben Boubaker et al
Taiwan/CGMH-CGU-32/2020	GV		20A	Taiwan	Taiwan	Taiwan	Taiwan	EPI_ISL_660544	Human	Laboratory Medicine	B.1.177	One week ago	Asia	Female	Department of Laboratory Medicine, Lin-Kou Chang Gung Memorial Hospital, Taoyuan, Taiwan		2020-09-06	Kuo-Chien Tsao et al B	Taoyuan
Singapore/1125/2020	GV	70	20A	Singapore	Singapore	Singapore	Singapore	EPI_ISL_626637	Human	National Public Health Laboratory, National Centre for Infectious Diseases	B.1.177	One month ago	Asia	Male	National Public Health Laboratory, National Centre for Infectious Diseases		2020-10-29	Tze Minn Mak et al
Singapore/1131/2020	GV	51	20A	Singapore	Singapore	Singapore	Singapore	EPI_ISL_626641	Human	National Public Health Laboratory, National Centre for Infectious Diseases	B.1.177	One month ago	Asia	Female	National Public Health Laboratory, National Centre for Infectious Diseases		2020-10-31	Tze Minn Mak et al
Singapore/1405/2020	GV	34	20A	Singapore	Singapore	Singapore	Singapore	EPI_ISL_645132	Human	National Public Health Laboratory, National Centre for Infectious Diseases	B.1.177	One month ago	Asia	Male	National Public Health Laboratory, National Centre for Infectious Diseases		2020-11-06	Tze Minn Mak et al
Singapore/1412/2020	GV	62	20A	Singapore	Singapore	Singapore	Singapore	EPI_ISL_654810	Human	National Public Health Laboratory, National Centre for Infectious Diseases	B.1.177	One week ago	Asia	Female	National Public Health Laboratory, National Centre for Infectious Diseases		2020-11-15	Tze Minn Mak et al
Spain/MD-IBV-99009627/2020	GV	27	20A	Spain	Spain	Madrid	Madrid	EPI_ISL_654367	Human	Hospital General Universitario Gregorio Mara√±√≥n	B.1.177	One week ago	Europe	Female	SeqCOVID-SPAIN consortium/IBV(CSIC)		2020-08-01	Dar√≠o Garc√≠a de Viedma et al	Madrid
Spain/CT-IBV-99009881/2020	GV	15	20A	Spain	Spain	Catalunya	Catalunya	EPI_ISL_660278	Human	Servicio de Microbiolog√≠a, Laboratori Cl√≠nic Metropolitana Nord. Hospital Universitari Germans Trias i Pujol. Institut d‚ÄôInvestigaci√≥ en Ci√®ncies de la Salut Germans Trias i Pujol (IGTP)	B.1.177	One week ago	Europe	Male	SeqCOVID-SPAIN consortium/IBV(CSIC)		2020-08-05	Elisa Martr√≥ et al	La Llagosta
Spain/MD-IBV-99008478/2020	GV	59	20A	Spain	Spain	Madrid	Madrid	EPI_ISL_654043	Human	Hospital General Universitario Gregorio Mara√±√≥n	B.1.177	One week ago	Europe	Male	SeqCOVID-SPAIN consortium/IBV(CSIC)		2020-08-09	Dar√≠o Garc√≠a de Viedma et al	Madrid
Ireland/SO-NVRL-73IRL20020/2020	GV		20A	Ireland	Ireland	Sligo	Sligo	EPI_ISL_639836	Human	National Virus Reference Laboratory	B.1.177	One month ago	Europe	Female	National Virus Reference Laboratory		2020-09-04	Michael Carr et al
Spain/MD-IBV-99008510/2020	GV	5	20A	Spain	Spain	Madrid	Madrid	EPI_ISL_654073	Human	Hospital General Universitario Gregorio Mara√±√≥n	B.1.177	One week ago	Europe	Male	SeqCOVID-SPAIN consortium/IBV(CSIC)		2020-09-10	Dar√≠o Garc√≠a de Viedma et al	Madrid
Lithuania/MR-LUHS-Eilnr469/2020	GV	37	20A	Lithuania	Lithuania	Kauno Apskritis	Kauno Apskritis	EPI_ISL_636899	Human	Lithuanian University of Health Sciences Hospital, Department of Laboratory Medicine	B.1.177	One month ago	Europe	Male	Lithuanian University of Health Sciences, Molecular cardiology lab.		2020-09-12	Lukas Zemaitis et al
Lithuania/MR-LUHS-Eilnr479/2020	GV	51	20A	Lithuania	Lithuania	Kauno Apskritis	Kauno Apskritis	EPI_ISL_636906	Human	Lithuanian University of Health Sciences Hospital, Department of Laboratory Medicine	B.1.177	One month ago	Europe	Female	Lithuanian University of Health Sciences, Molecular cardiology lab.		2020-09-12	Lukas Zemaitis et al
Lithuania/MR-LUHS-Eilnr470/2020	GV	53	20A	Lithuania	Lithuania	Kauno Apskritis	Kauno Apskritis	EPI_ISL_636900	Human	Lithuanian University of Health Sciences Hospital, Department of Laboratory Medicine	B.1.177	One month ago	Europe	Female	Lithuanian University of Health Sciences, Molecular cardiology lab.		2020-09-12	Lukas Zemaitis et al
Lithuania/MR-LUHS-Eilnr468/2020	GV	61	20A	Lithuania	Lithuania	Kauno Apskritis	Kauno Apskritis	EPI_ISL_636898	Human	Lithuanian University of Health Sciences Hospital, Department of Laboratory Medicine	B.1.177	One month ago	Europe	Female	Lithuanian University of Health Sciences, Molecular cardiology lab.		2020-09-12	Lukas Zemaitis et al
Germany/NW-HHU-243/2020	GV		20A	Germany	Germany	North Rhine Westphalia	North Rhine Westphalia	EPI_ISL_631376	Human	ZOTZ KLIMAS MVZ D√ºsseldorf-Centrum GbR √úBAG f√ºr Labormedizin, Genetik, Zytologie, Pathologie	B.1.177	One month ago	Europe		Center of Medical Microbiology, Virology, and Hospital Hygiene, University of Duesseldorf		2020-09-15	Maximilian Damagnez et al	Duesseldorf
Germany/NW-HHU-240/2020	GV		20A	Germany	Germany	North Rhine Westphalia	North Rhine Westphalia	EPI_ISL_631373	Human	ZOTZ KLIMAS MVZ D√ºsseldorf-Centrum GbR √úBAG f√ºr Labormedizin, Genetik, Zytologie, Pathologie	B.1.177	One month ago	Europe		Center of Medical Microbiology, Virology, and Hospital Hygiene, University of Duesseldorf		2020-09-15	Maximilian Damagnez et al	Duesseldorf
Spain/MD-IBV-99008573/2020	GV	20	20A	Spain	Spain	Madrid	Madrid	EPI_ISL_654113	Human	Hospital General Universitario Gregorio Mara√±√≥n	B.1.177	One week ago	Europe	Male	SeqCOVID-SPAIN consortium/IBV(CSIC)		2020-09-21	Dar√≠o Garc√≠a de Viedma et al	Madrid
Latvia/182/2020	GV		20A	Latvia	Latvia	Latvia	Latvia	EPI_ISL_639679	Human	CentrƒÅlƒÅ Laboratorija	B.1.177	One month ago	Europe		Latvian Biomedical Research and Study Centre		2020-09-27	Ivars Silamiƒ∑elis et al
Spain/AR-IBV-98008076/2020	GV	70	20A	Spain	Spain	Aragon	Aragon	EPI_ISL_654451	Human	Servicio de Microbiolog√≠a, Hospital Miguel Servet, Zaragoza	B.1.177	One week ago	Europe	Female	SeqCOVID-SPAIN consortium/IBV(CSIC)		2020-09-29	Antonio Rezusta L√≥pez et al	Zaragoza
Spain/MD-IBV-99008642/2020	GV	10	20A	Spain	Spain	Madrid	Madrid	EPI_ISL_654210	Human	Hospital General Universitario Gregorio Mara√±√≥n	B.1.177	One week ago	Europe	Male	SeqCOVID-SPAIN consortium/IBV(CSIC)		2020-09-29	Dar√≠o Garc√≠a de Viedma et al	Madrid
Germany/NW-HHU-255/2020	GV		20A	Germany	Germany	North Rhine Westphalia	North Rhine Westphalia	EPI_ISL_631388	Human	University Hospital Cologne	B.1.177	One month ago	Europe		Center of Medical Microbiology, Virology, and Hospital Hygiene, University of Duesseldorf		2020-09-30	Maximilian Damagnez et al	Cologne
Italy/APU-IZSPB_267PT/2020	GV	54	20A	Italy	Italy	Apulia	Apulia	EPI_ISL_653786	Human	Istituto Zooprofilattico Sperimentale della Puglia e della Basilicata	B.1.177	One month ago	Europe	Male	Istituto Zooprofilattico Sperimentale della Puglia e della Basilicata		2020-09-30	Parisi A. et al	Bari
Spain/PV-IBV-98008284/2020	GV	57	20A	Spain	Spain	Basque Country	Basque Country	EPI_ISL_654561	Human	Servicio de Microbiolog√≠a. Hospital Universitario Donostia. OSI Donostialdea. √Årea de Enfermedades Infecciosas, Grupo de Infecci√≥n Respiratoria y Resistencia Antimicrobiana. Instituto de Investigaci√≥n Sanitaria Biodonostia	B.1.177	One week ago	Europe	Female	SeqCOVID-SPAIN consortium/IBV(CSIC)		2020-10-03	Gustavo Cilla Eguiluz et al	San Sebastian
Ireland/MH-NVRL-20IRL82653/2020	GV		20A	Ireland	Ireland	Meath	Meath	EPI_ISL_639875	Human	National Virus Reference Laboratory	B.1.177	One month ago	Europe	Male	National Virus Reference Laboratory		2020-10-05	Michael Carr et al
Ireland/LH-NVRL-20IRL82456/2020	GV		20A	Ireland	Ireland	Louth	Louth	EPI_ISL_639879	Human	National Virus Reference Laboratory	B.1.177	One month ago	Europe	Male	National Virus Reference Laboratory		2020-10-05	Michael Carr et al
Ireland/CN-NVRL-20IRL82685/2020	GV		20A	Ireland	Ireland	Cavan	Cavan	EPI_ISL_639886	Human	National Virus Reference Laboratory	B.1.177	One month ago	Europe	Male	National Virus Reference Laboratory		2020-10-05	Michael Carr et al
Spain/MD-IBV-99008685/2020	GV	85	20A	Spain	Spain	Madrid	Madrid	EPI_ISL_654240	Human	Hospital General Universitario Gregorio Mara√±√≥n	B.1.177	One week ago	Europe	Male	SeqCOVID-SPAIN consortium/IBV(CSIC)		2020-10-06	Dar√≠o Garc√≠a de Viedma et al	Madrid
Germany/NW-HHU-314/2020	GV		20A	Germany	Germany	North Rhine Westphalia	North Rhine Westphalia	EPI_ISL_631317	Human	ZOTZ KLIMAS MVZ D√ºsseldorf-Centrum GbR √úBAG f√ºr Labormedizin, Genetik, Zytologie, Pathologie	B.1.177	One month ago	Europe		Center of Medical Microbiology, Virology, and Hospital Hygiene, University of Duesseldorf		2020-10-06	Maximilian Damagnez et al	Duesseldorf
Spain/CT-IBV-97009528/2020	GV	57	20A	Spain	Spain	Catalunya	Catalunya	EPI_ISL_671834	Human	Servicio de Microbiolog√≠a, Laboratori Cl√≠nic Metropolitana Nord. Hospital Universitari Germans Trias i Pujol. Institut d‚ÄôInvestigaci√≥ en Ci√®ncies de la Salut Germans Trias i Pujol (IGTP)	B.1	3-7 days ago	Europe	Female	SeqCOVID-SPAIN consortium/IBV(CSIC)		2020-10-07	Elisa Martr√≥ et al	Badalona
Ireland/D-NVRL-75IRL26026/2020	GV		20A	Ireland	Ireland	Dublin	Dublin	EPI_ISL_671884	Human	National Virus Reference Laboratory	B.1.177	3-7 days ago	Europe	Male	National Virus Reference Laboratory		2020-10-07	Michael Carr et al
Netherlands/UT-EMC-110/2020	GV		20A	Netherlands	Netherlands	Utrecht	Utrecht	EPI_ISL_632629	Human	Dutch COVID-19 response team	B.1.177	One month ago	Europe		Erasmus Medical Center		2020-10-08	Bas Oude Munnink et al
Ireland/D-NVRL-75IRL77046/2020	GV		20A	Ireland	Ireland	Dublin	Dublin	EPI_ISL_671892	Human	National Virus Reference Laboratory	B.1.177	3-7 days ago	Europe	Female	National Virus Reference Laboratory		2020-10-12	Michael Carr et al
Norway/4333/2020	GV		20A	Norway	Norway	Oslo	Oslo	EPI_ISL_635145	Human	Nordland Hospital - Bodo, Laboratory Department, Molecular Biology Unit	B.1.177	One month ago	Europe		Norwegian Institute of Public Health, Department of Virology		2020-10-12	Kathrine Stene-Johansen et al
Spain/PV-IBV-98008356/2020	GV	13	20A	Spain	Spain	Basque Country	Basque Country	EPI_ISL_654573	Human	Servicio de Microbiolog√≠a. Hospital Universitario Donostia. OSI Donostialdea. √Årea de Enfermedades Infecciosas, Grupo de Infecci√≥n Respiratoria y Resistencia Antimicrobiana. Instituto de Investigaci√≥n Sanitaria Biodonostia	B.1.177	One week ago	Europe	Female	SeqCOVID-SPAIN consortium/IBV(CSIC)		2020-10-12	Gustavo Cilla Eguiluz et al	San Sebastian
Ireland/D-NVRL-75IRL68622/2020	GV		20A	Ireland	Ireland	Dublin	Dublin	EPI_ISL_671889	Human	National Virus Reference Laboratory	B.1.177	3-7 days ago	Europe	Female	National Virus Reference Laboratory		2020-10-12	Michael Carr et al
Norway/4755/2020	GV		20A	Norway	Norway	Nordland	Nordland	EPI_ISL_668398	Human	Nordland Hospital - Bodo, Laboratory Department, Molecular Biology Unit	B.1.177	3-7 days ago	Europe		Norwegian Institute of Public Health, Department of Virology		2020-10-13	Kathrine Stene-Johansen et al
Ireland/D-NVRL-75IRL75521/2020	GV		20A	Ireland	Ireland	Dublin	Dublin	EPI_ISL_671890	Human	National Virus Reference Laboratory	B.1.177	3-7 days ago	Europe	Female	National Virus Reference Laboratory		2020-10-13	Michael Carr et al
Netherlands/UT-EMC-132/2020	GV		20A	Netherlands	Netherlands	Utrecht	Utrecht	EPI_ISL_632726	Human	Dutch COVID-19 response team	B.1.177	One month ago	Europe		Erasmus Medical Center		2020-10-14	Bas Oude Munnink et al
Netherlands/GE-RIVM-10399/2020	GV	30	20A	Netherlands	Netherlands	Gelderland	Gelderland	EPI_ISL_636537	Human	Dutch COVID-19 response team	B.1.177	One month ago	Europe	Male	National Institute for Public Health and the Environment (RIVM)		2020-10-20	Adam Meijer et al
Belgium/ULG-10584/2020	GV	58	20A	Belgium	Belgium	Li√®ge	Li√®ge	EPI_ISL_626298	Human	Department of Clinical Microbiology	B.1.177	One month ago	Europe	Female	GIGA Medical Genomics		2020-10-23	Keith Durkin et al
Spain/MD-IBV-99009664/2020	GV	32	20A	Spain	Spain	Madrid	Madrid	EPI_ISL_654391	Human	Hospital General Universitario Gregorio Mara√±√≥n	B.1.177	One week ago	Europe	Male	SeqCOVID-SPAIN consortium/IBV(CSIC)		2020-10-24	Dar√≠o Garc√≠a de Viedma et al	Madrid
Spain/PV-IBV-98008451/2020	GV	65	20A	Spain	Spain	Basque Country	Basque Country	EPI_ISL_654612	Human	Servicio de Microbiolog√≠a. Hospital Universitario Donostia. OSI Donostialdea. √Årea de Enfermedades Infecciosas, Grupo de Infecci√≥n Respiratoria y Resistencia Antimicrobiana. Instituto de Investigaci√≥n Sanitaria Biodonostia	B.1.177	One week ago	Europe	Female	SeqCOVID-SPAIN consortium/IBV(CSIC)		2020-10-24	Gustavo Cilla Eguiluz et al	San Sebastian
Sweden/20-53236/2020	GV	23	20A	Sweden	Sweden	Orebro	Orebro	EPI_ISL_676496	Human	Klinisk mikrobiologi	B.1.177	3-7 days ago	Europe	Male	The Public Health Agency of Sweden		2020-10-26	Department of Microbiology et al
Denmark/DCGC-8770/2020	GV		20A	Denmark	Denmark	Midtjylland	Midtjylland	EPI_ISL_626048	Human	Department of Virus and Microbiological Special Diagnostics, Statens Serum Institut, Denmark	B.1.177	One month ago	Europe		Albertsen lab, Department of Chemistry and Bioscience, Aalborg University, Denmark		2020-10-26	Danish Covid-19 Genome Consortia et al
Spain/MD-IBV-99009637/2020	GV	95	20A	Spain	Spain	Madrid	Madrid	EPI_ISL_654373	Human	Hospital General Universitario Gregorio Mara√±√≥n	B.1.177	One week ago	Europe	Male	SeqCOVID-SPAIN consortium/IBV(CSIC)		2020-10-27	Dar√≠o Garc√≠a de Viedma et al	Madrid
Spain/MD-IBV-99009643/2020	GV	93	20A	Spain	Spain	Madrid	Madrid	EPI_ISL_654378	Human	Hospital General Universitario Gregorio Mara√±√≥n	B.1.177	One week ago	Europe	Female	SeqCOVID-SPAIN consortium/IBV(CSIC)		2020-10-27	Dar√≠o Garc√≠a de Viedma et al	Madrid
Spain/CT-IBV-97009538/2020	GV	55	20A	Spain	Spain	Catalunya	Catalunya	EPI_ISL_671840	Human	Servicio de Microbiolog√≠a, Laboratori Cl√≠nic Metropolitana Nord. Hospital Universitari Germans Trias i Pujol. Institut d‚ÄôInvestigaci√≥ en Ci√®ncies de la Salut Germans Trias i Pujol (IGTP)	B.1.177	3-7 days ago	Europe	Female	SeqCOVID-SPAIN consortium/IBV(CSIC)		2020-10-28	Elisa Martr√≥ et al	Santa Coloma de Gramenet
Spain/MD-IBV-99009675/2020	GV	34	20A	Spain	Spain	Madrid	Madrid	EPI_ISL_654400	Human	Hospital General Universitario Gregorio Mara√±√≥n	B.1.177	One week ago	Europe	Female	SeqCOVID-SPAIN consortium/IBV(CSIC)		2020-10-31	Dar√≠o Garc√≠a de Viedma et al	Madrid
Denmark/DCGC-11212/2020	GV		20A	Denmark	Denmark	Nordjylland	Nordjylland	EPI_ISL_670772	Human	Department of Virus and Microbiological Special Diagnostics, Statens Serum Institut, Copenhagen, Denmark	B.1.177	3-7 days ago	Europe		Albertsen Lab, Department of Chemistry and Bioscience, Aalborg University, Denmark		2020-11-02	Danish Covid-19 Genome Consortium et al
France/IDF-IPP9555/2020	GV	51	20A	France	France	Ile de France	Ile de France	EPI_ISL_660325	Human	General practitioner	B.1.177	One week ago	Europe	Female	National Reference Center for Viruses of Respiratory Infections, Institut Pasteur, Paris		2020-11-02	Marion Barbet et al B	Villeneuve St Georges
Italy/APU-IZSPB_310PT/2020	GV	28	20A	Italy	Italy	Apulia	Apulia	EPI_ISL_653804	Human	I.R.C.C.S. "S. De Bellis" - Ente Ospedaliero	B.1.177	One month ago	Europe	Female	Istituto Zooprofilattico Sperimentale della Puglia e della Basilicata		2020-11-03	Parisi A. et al	Bari
Italy/APU-IZSPB_294PT/2020	GV	15	20A	Italy	Italy	Apulia	Apulia	EPI_ISL_653788	Human	I.R.C.C.S. "S. De Bellis" - Ente Ospedaliero	B.1.177	One month ago	Europe	Male	Istituto Zooprofilattico Sperimentale della Puglia e della Basilicata		2020-11-03	Parisi A. et al	Bari
Italy/APU-IZSPB_304PT/2020	GV	14	20A	Italy	Italy	Apulia	Apulia	EPI_ISL_653798	Human	I.R.C.C.S. "S. De Bellis" - Ente Ospedaliero	B.1.177	One month ago	Europe	Male	Istituto Zooprofilattico Sperimentale della Puglia e della Basilicata		2020-11-03	Parisi A. et al	Bari
Italy/APU-IZSPB_326PT/2020	GV	57	20A	Italy	Italy	Apulia	Apulia	EPI_ISL_653819	Human	I.R.C.C.S. "S. De Bellis" - Ente Ospedaliero	B.1.177	One month ago	Europe	Female	Istituto Zooprofilattico Sperimentale della Puglia e della Basilicata		2020-11-04	Parisi A. et al	Bari
England/QEUH-B3219E/2020	GV		20A	United Kingdom	United Kingdom	England	England	EPI_ISL_646425	Human	Lighthouse Lab in Glasgow	B.1.177	One month ago	Europe		Wellcome Sanger Institute for the COVID-19 Genomics UK (COG-UK) Consortium		2020-11-04	Harper VanSteenhouse et al
Sweden/20-53396/2020	GV	45	20A	Sweden	Sweden	Vastra Gotaland	Vastra Gotaland	EPI_ISL_676498	Human	Klinisk Mikrobiologi	B.1.177	3-7 days ago	Europe	Male	The Public Health Agency of Sweden		2020-11-05	Department of Microbiology et al
England/ALDP-B46CA5/2020	GV		20A	United Kingdom	United Kingdom	England	England	EPI_ISL_656219	Human	Lighthouse Lab in Alderley Park	B.1.177	One week ago	Europe		Wellcome Sanger Institute for the COVID-19 Genomics UK (COG-UK) Consortium		2020-11-06	Jacquelyn Wynn et al
England/QEUH-B424B0/2020	GV		20A	United Kingdom	United Kingdom	England	England	EPI_ISL_657092	Human	Lighthouse Lab in Glasgow	B.1.177	One week ago	Europe		Wellcome Sanger Institute for the COVID-19 Genomics UK (COG-UK) Consortium		2020-11-08	Harper VanSteenhouse et al
England/NOTT-11BD46/2020	GV		20A	United Kingdom	United Kingdom	England	England	EPI_ISL_652385	Human	Queens Medical Centre, Clinical Microbiology Department / DeepSeq Nottingham	B.1.177	One month ago	Europe		COVID-19 Genomics UK (COG-UK) Consortium		2020-11-13	Gemma Clark et al
Spain/AR-IBV-97009527/2020	GV	63	20A	Spain	Spain	Aragon	Aragon	EPI_ISL_671804	Human	Hospital Cl√≠nico Universitario Lozano Blesa de Zaragoza (Espa√±a)	B.1.177	3-7 days ago	Europe	Male	SeqCOVID-SPAIN consortium/IBV(CSIC)		2020-11-14	Rafael Benito et al	Zaragoza
England/ALDP-B8524E/2020	GV		20A	United Kingdom	United Kingdom	England	England	EPI_ISL_674340	Human	Lighthouse Lab in Alderley Park	B.1.177	3-7 days ago	Europe		Wellcome Sanger Institute for the COVID-19 Genomics UK (COG-UK) Consortium		2020-11-15	Jacquelyn Wynn et al
Denmark/DCGC-9376/2020	GV		20A	Denmark	Denmark	Midtjylland	Midtjylland	EPI_ISL_668939	Human	Department of Virus and Microbiological Special Diagnostics, Statens Serum Institut, Copenhagen, Denmark	B.1.177	3-7 days ago	Europe		Albertsen Lab, Department of Chemistry and Bioscience, Aalborg University, Denmark		2020-11-16	Danish Covid-19 Genome Consortium et al
Ireland/D-NVRL-20IRL87996/2020	GV		20A	Ireland	Ireland	Dublin	Dublin	EPI_ISL_671883	Human	National Virus Reference Laboratory	B.1.177	3-7 days ago	Europe	Female	National Virus Reference Laboratory		2020-11-17	Michael Carr et al
Sweden/20-53525/2020	GV	43	20A	Sweden	Sweden	Orebro	Orebro	EPI_ISL_676504	Human	Klinisk mikrobiologi	B.1.177	3-7 days ago	Europe	Male	The Public Health Agency of Sweden		2020-11-22	Department of Microbiology et al
Belgium/ULG-10925/2020	GV	29	20A	Belgium	Belgium	Li√®ge	Li√®ge	EPI_ISL_678465	Human	Department of Clinical Microbiology	B.1.177	1-2 days ago	Europe	Female	GIGA Medical Genomics		2020-11-24	Keith Durkin et al
England/204961201/2020	GV	48	20A	United Kingdom	United Kingdom	England	England	EPI_ISL_678830	Human	Respiratory Virus Unit, Microbiology Services Colindale, Public Health England	B.1	1-2 days ago	Europe	Male	COVID-19 Genomics UK (COG-UK) Consortium		2020-12-01	PHE Covid Sequencing Team et al
Australia/NSW1158/2020	GV		20A	Australia	Australia	New South Wales	New South Wales	EPI_ISL_629029	Human	South Eastern Area Laboratory Services (SEALS)	B.1.177	One month ago	Oceania		NSW Health Pathology - Institute of Clinical Pathology and Medical Research; Westmead Hospital; University of Sydney		2020-09-24	CIDM-PH et al. et al	Sydney
Australia/NSW1186/2020	GV		20A	Australia	Australia	New South Wales	New South Wales	EPI_ISL_667787	Human	South Eastern Area Laboratory Services (SEALS)	B.1.177	3-7 days ago	Oceania		NSW Health Pathology - Institute of Clinical Pathology and Medical Research; Westmead Hospital; University of Sydney		2020-10-21	CIDM-PH et al. et al	Sydney
NewZealand/20CV0540/2020	GV		20A	New Zealand	New Zealand	Auckland	Auckland	EPI_ISL_637091	Human	LabPLUS	B.1.177	One month ago	Oceania	Female	Institute of Environmental Science and Research (ESR)		2020-11-08	Xiaoyun Ren et al
NewZealand/20CV0558/2020	GV		20A	New Zealand	New Zealand	Waikato	Waikato	EPI_ISL_649124	Human	Waikato Hospital	B.1.177	One month ago	Oceania	Male	Institute of Environmental Science and Research (ESR)		2020-11-13	Xiaoyun Ren et al
NewZealand/20CV0567/2020	GV		20A	New Zealand	New Zealand	Auckland	Auckland	EPI_ISL_661256	Human	LabPLUS	B.1.177	One week ago	Oceania	Female	Institute of Environmental Science and Research (ESR)		2020-11-14	Xiaoyun Ren et al
NewZealand/20CV0588/2020	GV		20A	New Zealand	New Zealand	Auckland	Auckland	EPI_ISL_661262	Human	LabPLUS	B.1.177	One week ago	Oceania	Female	Institute of Environmental Science and Research (ESR)		2020-11-19	Xiaoyun Ren et al
Curacao/CW-RIVM-10309/2020	L	67	19A	Curacao	Curacao	Curacao	Curacao	EPI_ISL_636493	Human	Dutch COVID-19 response team	B.27	One month ago	South America	Male	National Institute for Public Health and the Environment (RIVM)		2020-03-10	Adam Meijer et al
Curacao/CW-RIVM-10308/2020	L	68	19A	Curacao	Curacao	Curacao	Curacao	EPI_ISL_636492	Human	Dutch COVID-19 response team	B.27	One month ago	South America	Male	National Institute for Public Health and the Environment (RIVM)		2020-03-10	Adam Meijer et al
Madagascar/VIRO-2728/2020	O	46	19A	Madagascar	Madagascar	Toamasina	Toamasina	EPI_ISL_677636	Human	Virology Unit, Institut Pasteur de Madagascar	B.6	3-7 days ago	Africa	Male	Virology Unit, Institut Pasteur de Madagascar		2020-03-26	Christian Ranaivoson et al
Iran/Q111/2020	O	52	19A	Iran	Iran	Iran	Iran	EPI_ISL_637102	Human	Indian Council of Medical Research-National Institute of Virology, Microbial Containment Complex	B.4	One month ago	Asia	Female	Indian Council of Medical Research-National Institute of Virology, Microbial Containment Complex		2020-03-10	Pragya D. Yadav et al
Pakistan/KP-RMI-01/2020	O		19A	Pakistan	Pakistan	Pakistan	Pakistan	EPI_ISL_632908	Human	Genomic Sciences, Rehman Medical Institute	B.6	One month ago	Asia		Genomic Sciences, Rehman Medical Institute		2020-04-01	Ali et al		MW242667.1
SaudiArabia/KAUST-RIYADH1229/2020	O		20A	Saudi Arabia	Saudi Arabia	Riyadh	Riyadh	EPI_ISL_678238	Human	Pathogen Genomics Lab King Abdullah University of Science and Technology(KAUST)	B.1.36	1-2 days ago	Asia		Pathogen Genomics Lab King Abdullah University of Science and Technology(KAUST)		2020-08-11	Muhammad Shuaib et al
Japan/Donner88/2020	O		20B	Japan	Japan	Kanto	Kanto	EPI_ISL_644992	Human	Department of Infectious Diseases, Keio University School of Medicine, Tokyo, Japan	B.1.1.72	One month ago	Asia		Center for Medical Genetics, Keio University School of Medicine, Tokyo, Japan		2020-08-11	Kenjiro Kosaki et al
India/WB-IICB-034/2020	O		19A	India	India	West Bengal	West Bengal	EPI_ISL_661307	Human	CSIR-Indian Institute of Chemical Biology, MEDICA Supercpecialty Hospital Kolkata	B.1.153	One week ago	Asia		CSIR-Indian Institute of Chemical Biology, MEDICA Supercpecialty Hospital Kolkata		2020-10-29	Sujay Krishna Maity et al
India/WB-IICB-037/2020	O		20A	India	India	West Bengal	West Bengal	EPI_ISL_661310	Human	CSIR-Indian Institute of Chemical Biology, MEDICA Supercpecialty Hospital Kolkata	B.1.36	One week ago	Asia		CSIR-Indian Institute of Chemical Biology, MEDICA Supercpecialty Hospital Kolkata		2020-10-29	Sujay Krishna Maity et al
India/WB-IICB-036/2020	O		20B	India	India	West Bengal	West Bengal	EPI_ISL_661309	Human	CSIR-Indian Institute of Chemical Biology, MEDICA Supercpecialty Hospital Kolkata	B.1.1	One week ago	Asia		CSIR-Indian Institute of Chemical Biology, MEDICA Supercpecialty Hospital Kolkata		2020-10-29	Sujay Krishna Maity et al
SriLanka/C26818/2020	O	54	20C	Sri Lanka	Sri Lanka	Colombo	Colombo	EPI_ISL_668447	Human	Centre for Dengue Research, Department of Immunology and Molecular Medicine	B.1	3-7 days ago	Asia	Female	Centre for Dengue Research, Department of Immunology and Molecular Medicine		2020-11-03	Chandima Jeewandara et al A
SriLanka/C27337/2020	O	46	20C	Sri Lanka	Sri Lanka	Colombo	Colombo	EPI_ISL_668448	Human	Centre for Dengue Research, Department of Immunology and Molecular Medicine	B	3-7 days ago	Asia	Male	Centre for Dengue Research, Department of Immunology and Molecular Medicine		2020-11-03	Chandima Jeewandara et al A
Palestine/WB-AQU-P3/2020	O		20B	Palestine	Palestine	Jericho	Jericho	EPI_ISL_661272	Human	Al-Quds Nutrition and Health Research Institute, Al-Quds University	B.2.1	One week ago	Asia		Al-Quds Nutrition and Health Research Institute, Al-Quds University		2020-11-07	Ereqat et al
SriLanka/C31262/2020	O	74	20C	Sri Lanka	Sri Lanka	Colombo	Colombo	EPI_ISL_668452	Human	Centre for Dengue Research, Department of Immunology and Molecular Medicine	B.1	3-7 days ago	Asia	Male	Centre for Dengue Research, Department of Immunology and Molecular Medicine		2020-11-09	Chandima Jeewandara et al A
Hungary/UD-56307/2020	O	22	20A	Hungary	Hungary	Hajd√∫-Bihar County	Hajd√∫-Bihar County	EPI_ISL_671426	Human	University of Debrecen, Department of Medical Microbiology	B.1.160	3-7 days ago	Europe	Female	National Laboratory of Virology, Szent√°gothai Research Centre		2020-08-31	Endre G√°bor T√≥th et al
Hungary/UD-57955/2020	O	45	20B	Hungary	Hungary	Hajd√∫-Bihar County	Hajd√∫-Bihar County	EPI_ISL_671439	Human	University of Debrecen, Department of Medical Microbiology	B.1.1.1	3-7 days ago	Europe	Female	National Laboratory of Virology, Szent√°gothai Research Centre		2020-09-02	Endre G√°bor T√≥th et al
Hungary/US-63539w/2020	O	37	20A	Hungary	Hungary	Csongr√°d County	Csongr√°d County	EPI_ISL_677820	Human	University of Szeged, Institute of Clinical Microbiology	B.1.160	1-2 days ago	Europe	Male	National Laboratory of Virology, Szent√°gothai Research Centre		2020-10-07	Endre G√°bor T√≥th et al
Hungary/UD-93943/2020	O	22	20A	Hungary	Hungary	Hajd√∫-Bihar County	Hajd√∫-Bihar County	EPI_ISL_671489	Human	University of Debrecen, Department of Medical Microbiology	B.1.160	3-7 days ago	Europe	Male	National Laboratory of Virology, Szent√°gothai Research Centre		2020-10-08	Endre G√°bor T√≥th et al
Hungary/UD-93941/2020	O	28	20A	Hungary	Hungary	Hajd√∫-Bihar County	Hajd√∫-Bihar County	EPI_ISL_671488	Human	University of Debrecen, Department of Medical Microbiology	B.1.160	3-7 days ago	Europe	Male	National Laboratory of Virology, Szent√°gothai Research Centre		2020-10-08	Endre G√°bor T√≥th et al
Hungary/UD-94381/2020	O	44	20A	Hungary	Hungary	Borsod-Aba√∫j-Zempl√©n County	Borsod-Aba√∫j-Zempl√©n County	EPI_ISL_678394	Human	University of Debrecen, Department of Medical Microbiology	B.1.160	1-2 days ago	Europe	Female	National Laboratory of Virology, Szent√°gothai Research Centre		2020-10-08	Endre G√°bor T√≥th et al
USA/MS-CDC-6516/2020	O	58	20C	USA	USA	Mississippi	Mississippi	EPI_ISL_648004	Human	MS Public Health Laboratory	B.1	One month ago	North America	Male	Pathogen Discovery, Respiratory Viruses Branch, Division of Viral Diseases, Centers for Disease Control and Prevention		2020-08-22	Yan Li et al B		MW279422.1
Ecuador/ZZL-4/2020	O	28	20B	Ecuador	Ecuador	Pichincha	Pichincha	EPI_ISL_660070	Human	Zurita & Zurita Laboratorios	B.1.1	One week ago	South America	Male	Zurita & Zurita Laboratorios		2020-11-26	Gabriela Sevillano Camilo Zurita-Salinas Karen Loaiza David Ortega-Paredes Jeannete Zurita et al	Quito
BurkinaFaso/2-009/2020	S	50	19B	Burkina Faso	Burkina Faso	Hauts-Bassins	Hauts-Bassins	EPI_ISL_660450	Human	Laboratoire de Microbiologie CHU Souro Sanou	A	One week ago	Africa	Male	Centre Muraz		2020-05-08	Abdoul-Salam Ouedraogo et al	Bobo Dioulasso
BurkinaFaso/2-012/2020	S	54	19B	Burkina Faso	Burkina Faso	Hauts-Bassins	Hauts-Bassins	EPI_ISL_660451	Human	Laboratoire de Microbiologie CHU Souro Sanou	A	One week ago	Africa	Female	Centre Muraz		2020-05-10	Abdoul-Salam Ouedraogo et al	Bobo Dioulasso
BurkinaFaso/588/2020	S	34	19B	Burkina Faso	Burkina Faso	Sud-Ouest	Sud-Ouest	EPI_ISL_660475	Human	Laboratoire de Microbiologie CHU Souro Sanou	A	One week ago	Africa	Male	Centre Muraz		2020-06-21	Abdoul-Salam Ouedraogo et al	Bati√©
BurkinaFaso/1174/2020	S	44	19B	Burkina Faso	Burkina Faso	Hauts-Bassins	Hauts-Bassins	EPI_ISL_660478	Human	Laboratoire de Microbiologie CHU Souro Sanou	A	One week ago	Africa	Male	Centre Muraz		2020-07-23	Abdoul-Salam Ouedraogo et al	Bobo Dioulasso
BurkinaFaso/1447/2020	S	55	19B	Burkina Faso	Burkina Faso	Hauts-Bassins	Hauts-Bassins	EPI_ISL_660447	Human	Laboratoire de Microbiologie CHU Souro Sanou	A	One week ago	Africa	Male	Centre Muraz		2020-08-07	Abdoul-Salam Ouedraogo et al	Bobo Dioulasso
BurkinaFaso/2-039-1610/2020	S	53	19B	Burkina Faso	Burkina Faso	Hauts-Bassins	Hauts-Bassins	EPI_ISL_660454	Human	Laboratoire de Microbiologie CHU Souro Sanou	A	One week ago	Africa	Female	Centre Muraz		2020-08-10	Abdoul-Salam Ouedraogo et al	Bobo Dioulasso
BurkinaFaso/2-053-1646/2020	S	36	19B	Burkina Faso	Burkina Faso	Hauts-Bassins	Hauts-Bassins	EPI_ISL_660455	Human	Laboratoire de Microbiologie CHU Souro Sanou	A	One week ago	Africa	Female	Centre Muraz		2020-08-12	Abdoul-Salam Ouedraogo et al	Bobo Dioulasso
BurkinaFaso/1683/2020	S	40	19B	Burkina Faso	Burkina Faso	Hauts-Bassins	Hauts-Bassins	EPI_ISL_660513	Human	Laboratoire de Microbiologie CHU Souro Sanou	A	One week ago	Africa	Female	Centre Muraz		2020-08-14	Abdoul-Salam Ouedraogo et al	Bobo Dioulasso
BurkinaFaso/2-037-1654/2020	S	32	19B	Burkina Faso	Burkina Faso	Hauts-Bassins	Hauts-Bassins	EPI_ISL_660453	Human	Laboratoire de Microbiologie CHU Souro Sanou	A	One week ago	Africa	Female	Centre Muraz		2020-08-14	Abdoul-Salam Ouedraogo et al	Bobo Dioulasso
BurkinaFaso/1689/2020	S	58	19B	Burkina Faso	Burkina Faso	Hauts-Bassins	Hauts-Bassins	EPI_ISL_660448	Human	Laboratoire de Microbiologie CHU Souro Sanou	A	One week ago	Africa	Male	Centre Muraz		2020-08-14	Abdoul-Salam Ouedraogo et al	Bobo Dioulasso
BurkinaFaso/1698/2020	S	29	19B	Burkina Faso	Burkina Faso	Hauts-Bassins	Hauts-Bassins	EPI_ISL_660449	Human	Laboratoire de Microbiologie CHU Souro Sanou	A	One week ago	Africa	Male	Centre Muraz		2020-08-14	Abdoul-Salam Ouedraogo et al	Bobo Dioulasso
BurkinaFaso/1718/2020	S	30	19B	Burkina Faso	Burkina Faso	Hauts-Bassins	Hauts-Bassins	EPI_ISL_660514	Human	Laboratoire de Microbiologie CHU Souro Sanou	A	One week ago	Africa	Female	Centre Muraz		2020-08-15	Abdoul-Salam Ouedraogo et al	Bobo Dioulasso
BurkinaFaso/2-043-1764/2020	S	32	19B	Burkina Faso	Burkina Faso	Hauts-Bassins	Hauts-Bassins	EPI_ISL_660499	Human	Laboratoire de Microbiologie CHU Souro Sanou	A	One week ago	Africa	Female	Centre Muraz		2020-08-15	Abdoul-Salam Ouedraogo et al	Bobo Dioulasso
BurkinaFaso/2-052-1891/2020	S	30	19B	Burkina Faso	Burkina Faso	Hauts-Bassins	Hauts-Bassins	EPI_ISL_660527	Human	Laboratoire de Microbiologie CHU Souro Sanou	A	One week ago	Africa	Male	Centre Muraz		2020-08-20	Abdoul-Salam Ouedraogo et al	Bobo Dioulasso
BurkinaFaso/1941/2020	S	40	19B	Burkina Faso	Burkina Faso	Hauts-Bassins	Hauts-Bassins	EPI_ISL_660505	Human	Laboratoire de Microbiologie CHU Souro Sanou	A	One week ago	Africa	Male	Centre Muraz		2020-08-24	Abdoul-Salam Ouedraogo et al	Bobo Dioulasso
BurkinaFaso/2-060-1985/2020	S	24	19B	Burkina Faso	Burkina Faso	Hauts-Bassins	Hauts-Bassins	EPI_ISL_660500	Human	Laboratoire de Microbiologie CHU Souro Sanou	A	One week ago	Africa	Male	Centre Muraz		2020-08-24	Abdoul-Salam Ouedraogo et al	Bobo Dioulasso
BurkinaFaso/1977/2020	S	33	19B	Burkina Faso	Burkina Faso	Hauts-Bassins	Hauts-Bassins	EPI_ISL_660526	Human	Laboratoire de Microbiologie CHU Souro Sanou	A	One week ago	Africa	Female	Centre Muraz		2020-08-27	Abdoul-Salam Ouedraogo et al	Bobo Dioulasso
BurkinaFaso/2173/2020	S	29	19B	Burkina Faso	Burkina Faso	Hauts-Bassins	Hauts-Bassins	EPI_ISL_660508	Human	Laboratoire de Microbiologie CHU Souro Sanou	A	One week ago	Africa	Male	Centre Muraz		2020-09-02	Abdoul-Salam Ouedraogo et al	Bobo Dioulasso
BurkinaFaso/2163/2020	S	21	19B	Burkina Faso	Burkina Faso	Hauts-Bassins	Hauts-Bassins	EPI_ISL_660512	Human	Laboratoire de Microbiologie CHU Souro Sanou	A	One week ago	Africa	Male	Centre Muraz		2020-09-02	Abdoul-Salam Ouedraogo et al	Bobo Dioulasso
BurkinaFaso/2306/2020	S	38	19B	Burkina Faso	Burkina Faso	Hauts-Bassins	Hauts-Bassins	EPI_ISL_660523	Human	Laboratoire de Microbiologie CHU Souro Sanou	A	One week ago	Africa	Female	Centre Muraz		2020-09-09	Abdoul-Salam Ouedraogo et al	Bobo Dioulasso
BurkinaFaso/2307/2020	S	57	19B	Burkina Faso	Burkina Faso	Hauts-Bassins	Hauts-Bassins	EPI_ISL_660480	Human	Laboratoire de Microbiologie CHU Souro Sanou	A	One week ago	Africa	Female	Centre Muraz		2020-09-09	Abdoul-Salam Ouedraogo et al	Bobo Dioulasso
BurkinaFaso/2411/2020	S	35	19B	Burkina Faso	Burkina Faso	Hauts-Bassins	Hauts-Bassins	EPI_ISL_660496	Human	Laboratoire de Microbiologie CHU Souro Sanou	A	One week ago	Africa	Female	Centre Muraz		2020-09-11	Abdoul-Salam Ouedraogo et al	Orodara
BurkinaFaso/2496/2020	S	31	19B	Burkina Faso	Burkina Faso	Hauts-Bassins	Hauts-Bassins	EPI_ISL_660487	Human	Laboratoire de Microbiologie CHU Souro Sanou	A	One week ago	Africa	Male	Centre Muraz		2020-09-11	Abdoul-Salam Ouedraogo et al	Bobo Dioulasso
BurkinaFaso/2407/2020	S	26	19B	Burkina Faso	Burkina Faso	Hauts-Bassins	Hauts-Bassins	EPI_ISL_660528	Human	Laboratoire de Microbiologie CHU Souro Sanou	A	One week ago	Africa	Male	Centre Muraz		2020-09-11	Abdoul-Salam Ouedraogo et al	Bobo Dioulasso
BurkinaFaso/2372/2020	S	40	19B	Burkina Faso	Burkina Faso	Hauts-Bassins	Hauts-Bassins	EPI_ISL_660501	Human	Laboratoire de Microbiologie CHU Souro Sanou	A	One week ago	Africa	Male	Centre Muraz		2020-09-11	Abdoul-Salam Ouedraogo et al	Orodara
BurkinaFaso/2359/2020	S	42	19B	Burkina Faso	Burkina Faso	Hauts-Bassins	Hauts-Bassins	EPI_ISL_660481	Human	Laboratoire de Microbiologie CHU Souro Sanou	A	One week ago	Africa	Female	Centre Muraz		2020-09-11	Abdoul-Salam Ouedraogo et al	N'Dorola
BurkinaFaso/2375/2020	S	39	19B	Burkina Faso	Burkina Faso	Hauts-Bassins	Hauts-Bassins	EPI_ISL_660524	Human	Laboratoire de Microbiologie CHU Souro Sanou	A	One week ago	Africa	Female	Centre Muraz		2020-09-11	Abdoul-Salam Ouedraogo et al	Orodara
BurkinaFaso/2481/2020	S	36	19B	Burkina Faso	Burkina Faso	Hauts-Bassins	Hauts-Bassins	EPI_ISL_660502	Human	Laboratoire de Microbiologie CHU Souro Sanou	A	One week ago	Africa	Male	Centre Muraz		2020-09-11	Abdoul-Salam Ouedraogo et al	N'Dorola
BurkinaFaso/2439/2020	S	34	19B	Burkina Faso	Burkina Faso	Hauts-Bassins	Hauts-Bassins	EPI_ISL_660483	Human	Laboratoire de Microbiologie CHU Souro Sanou	A	One week ago	Africa	Male	Centre Muraz		2020-09-11	Abdoul-Salam Ouedraogo et al	N'Dorola
BurkinaFaso/2446/2020	S	37	19B	Burkina Faso	Burkina Faso	Hauts-Bassins	Hauts-Bassins	EPI_ISL_660484	Human	Laboratoire de Microbiologie CHU Souro Sanou	A	One week ago	Africa	Male	Centre Muraz		2020-09-11	Abdoul-Salam Ouedraogo et al	N'Dorola
BurkinaFaso/2453/2020	S	27	19B	Burkina Faso	Burkina Faso	Hauts-Bassins	Hauts-Bassins	EPI_ISL_660485	Human	Laboratoire de Microbiologie CHU Souro Sanou	A	One week ago	Africa	Male	Centre Muraz		2020-09-11	Abdoul-Salam Ouedraogo et al	N'Dorola
BurkinaFaso/2473/2020	S	34	19B	Burkina Faso	Burkina Faso	Hauts-Bassins	Hauts-Bassins	EPI_ISL_660486	Human	Laboratoire de Microbiologie CHU Souro Sanou	A	One week ago	Africa	Male	Centre Muraz		2020-09-11	Abdoul-Salam Ouedraogo et al	N'Dorola
BurkinaFaso/2366/2020	S	40	19B	Burkina Faso	Burkina Faso	Hauts-Bassins	Hauts-Bassins	EPI_ISL_660482	Human	Laboratoire de Microbiologie CHU Souro Sanou	A	One week ago	Africa	Male	Centre Muraz		2020-09-11	Abdoul-Salam Ouedraogo et al	Bobo Dioulasso
BurkinaFaso/2-064-2547/2020	S	22	19B	Burkina Faso	Burkina Faso	Hauts-Bassins	Hauts-Bassins	EPI_ISL_660456	Human	Laboratoire de Microbiologie CHU Souro Sanou	A	One week ago	Africa	Female	Centre Muraz		2020-09-12	Abdoul-Salam Ouedraogo et al	Bobo Dioulasso
BurkinaFaso/2561/2020	S	31	19B	Burkina Faso	Burkina Faso	Hauts-Bassins	Hauts-Bassins	EPI_ISL_660510	Human	Laboratoire de Microbiologie CHU Souro Sanou	A	One week ago	Africa	Male	Centre Muraz		2020-09-13	Abdoul-Salam Ouedraogo et al	Bobo Dioulasso
BurkinaFaso/2598/2020	S	60	19B	Burkina Faso	Burkina Faso	Hauts-Bassins	Hauts-Bassins	EPI_ISL_660459	Human	Laboratoire de Microbiologie CHU Souro Sanou	A	One week ago	Africa	Male	Centre Muraz		2020-09-14	Abdoul-Salam Ouedraogo et al	Bobo Dioulasso
BurkinaFaso/2636/2020	S	42	19B	Burkina Faso	Burkina Faso	Hauts-Bassins	Hauts-Bassins	EPI_ISL_660460	Human	Laboratoire de Microbiologie CHU Souro Sanou	A	One week ago	Africa	Female	Centre Muraz		2020-09-16	Abdoul-Salam Ouedraogo et al	Bobo Dioulasso
BurkinaFaso/2645/2020	S	32	19B	Burkina Faso	Burkina Faso	Hauts-Bassins	Hauts-Bassins	EPI_ISL_660517	Human	Laboratoire de Microbiologie CHU Souro Sanou	A	One week ago	Africa	Female	Centre Muraz		2020-09-16	Abdoul-Salam Ouedraogo et al	Bobo Dioulasso
BurkinaFaso/2701/2020	S	39	19B	Burkina Faso	Burkina Faso	Hauts-Bassins	Hauts-Bassins	EPI_ISL_660461	Human	Laboratoire de Microbiologie CHU Souro Sanou	A	One week ago	Africa	Male	Centre Muraz		2020-09-16	Abdoul-Salam Ouedraogo et al	Bobo Dioulasso
BurkinaFaso/2679/2020	S	38	19B	Burkina Faso	Burkina Faso	Hauts-Bassins	Hauts-Bassins	EPI_ISL_660509	Human	Laboratoire de Microbiologie CHU Souro Sanou	A	One week ago	Africa	Female	Centre Muraz		2020-09-16	Abdoul-Salam Ouedraogo et al	Bobo Dioulasso
BurkinaFaso/2939/2020	S	40	19B	Burkina Faso	Burkina Faso	Hauts-Bassins	Hauts-Bassins	EPI_ISL_660520	Human	Laboratoire de Microbiologie CHU Souro Sanou	A	One week ago	Africa	Male	Centre Muraz		2020-09-21	Abdoul-Salam Ouedraogo et al	Bobo Dioulasso
BurkinaFaso/2944/2020	S	70	19B	Burkina Faso	Burkina Faso	Hauts-Bassins	Hauts-Bassins	EPI_ISL_660464	Human	Laboratoire de Microbiologie CHU Souro Sanou	A	One week ago	Africa	Female	Centre Muraz		2020-09-21	Abdoul-Salam Ouedraogo et al	Bobo Dioulasso
BurkinaFaso/2957/2020	S	47	19B	Burkina Faso	Burkina Faso	Hauts-Bassins	Hauts-Bassins	EPI_ISL_660518	Human	Laboratoire de Microbiologie CHU Souro Sanou	A	One week ago	Africa	Male	Centre Muraz		2020-09-21	Abdoul-Salam Ouedraogo et al	Bobo Dioulasso
BurkinaFaso/3007/2020	S	50	19B	Burkina Faso	Burkina Faso	Hauts-Bassins	Hauts-Bassins	EPI_ISL_660506	Human	Laboratoire de Microbiologie CHU Souro Sanou	A	One week ago	Africa	Male	Centre Muraz		2020-09-24	Abdoul-Salam Ouedraogo et al	Bobo Dioulasso
BurkinaFaso/3052/2020	S	56	19B	Burkina Faso	Burkina Faso	Hauts-Bassins	Hauts-Bassins	EPI_ISL_660466	Human	Laboratoire de Microbiologie CHU Souro Sanou	A	One week ago	Africa	Female	Centre Muraz		2020-09-25	Abdoul-Salam Ouedraogo et al	Bobo Dioulasso
BurkinaFaso/3535/2020	S	62	19B	Burkina Faso	Burkina Faso	Hauts-Bassins	Hauts-Bassins	EPI_ISL_660521	Human	Laboratoire de Microbiologie CHU Souro Sanou	A	One week ago	Africa	Male	Centre Muraz		2020-10-09	Abdoul-Salam Ouedraogo et al	Bobo Dioulasso
BurkinaFaso/3548/2020	S	35	19B	Burkina Faso	Burkina Faso	Hauts-Bassins	Hauts-Bassins	EPI_ISL_660507	Human	Laboratoire de Microbiologie CHU Souro Sanou	A	One week ago	Africa	Female	Centre Muraz		2020-10-09	Abdoul-Salam Ouedraogo et al	Bobo Dioulasso
BurkinaFaso/3570/2020	S	42	19B	Burkina Faso	Burkina Faso	Hauts-Bassins	Hauts-Bassins	EPI_ISL_660468	Human	Laboratoire de Microbiologie CHU Souro Sanou	A	One week ago	Africa	Male	Centre Muraz		2020-10-09	Abdoul-Salam Ouedraogo et al	Bobo Dioulasso
BurkinaFaso/3573/2020	S	33	19B	Burkina Faso	Burkina Faso	Hauts-Bassins	Hauts-Bassins	EPI_ISL_660511	Human	Laboratoire de Microbiologie CHU Souro Sanou	A	One week ago	Africa	Female	Centre Muraz		2020-10-09	Abdoul-Salam Ouedraogo et al	Bobo Dioulasso
BurkinaFaso/3567/2020	S	68	19B	Burkina Faso	Burkina Faso	Hauts-Bassins	Hauts-Bassins	EPI_ISL_660488	Human	Laboratoire de Microbiologie CHU Souro Sanou	A	One week ago	Africa	Male	Centre Muraz		2020-10-09	Abdoul-Salam Ouedraogo et al	Bobo Dioulasso
BurkinaFaso/3953/2020	S	31	19B	Burkina Faso	Burkina Faso	Hauts-Bassins	Hauts-Bassins	EPI_ISL_660497	Human	Laboratoire de Microbiologie CHU Souro Sanou	A	One week ago	Africa	Male	Centre Muraz		2020-10-19	Abdoul-Salam Ouedraogo et al	Bobo Dioulasso
BurkinaFaso/3952/2020	S	58	19B	Burkina Faso	Burkina Faso	Hauts-Bassins	Hauts-Bassins	EPI_ISL_660489	Human	Laboratoire de Microbiologie CHU Souro Sanou	A	One week ago	Africa	Male	Centre Muraz		2020-10-19	Abdoul-Salam Ouedraogo et al	Bobo Dioulasso
BurkinaFaso/4215/2020	S	42	19B	Burkina Faso	Burkina Faso	Hauts-Bassins	Hauts-Bassins	EPI_ISL_660472	Human	Laboratoire de Microbiologie CHU Souro Sanou	A	One week ago	Africa	Male	Centre Muraz		2020-10-27	Abdoul-Salam Ouedraogo et al	Bobo Dioulasso
BurkinaFaso/4307/2020	S	41	19B	Burkina Faso	Burkina Faso	Hauts-Bassins	Hauts-Bassins	EPI_ISL_660473	Human	Laboratoire de Microbiologie CHU Souro Sanou	A	One week ago	Africa	Female	Centre Muraz		2020-11-03	Abdoul-Salam Ouedraogo et al	Bobo Dioulasso
BurkinaFaso/4312/2020	S	46	19B	Burkina Faso	Burkina Faso	Hauts-Bassins	Hauts-Bassins	EPI_ISL_660519	Human	Laboratoire de Microbiologie CHU Souro Sanou	A	One week ago	Africa	Male	Centre Muraz		2020-11-03	Abdoul-Salam Ouedraogo et al	Bobo Dioulasso
Vietnam/38238/2020	S	29	19B	Vietnam	China	Vinhphuc	Hubei	EPI_ISL_660541	Human	National Influenza Center, National Institute of Hygiene and Epidemiology (NIHE)	A	One week ago	Asia	Female	National Influenza Center, National Institute of Hygiene and Epidemiology (NIHE)		2020-01-31	Le Quynh Mai et al
Singapore/1390/2020	S	33	19B	Singapore	Singapore	Singapore	Singapore	EPI_ISL_645117	Human	National Public Health Laboratory, National Centre for Infectious Diseases	A	One month ago	Asia	Female	National Public Health Laboratory, National Centre for Infectious Diseases		2020-11-04	Tze Minn Mak et al
Spain/MD-IBV-99009625/2020	S	63	19B	Spain	Spain	Madrid	Madrid	EPI_ISL_654337	Human	Hospital General Universitario Gregorio Mara√±√≥n	A.5	One week ago	Europe	Female	SeqCOVID-SPAIN consortium/IBV(CSIC)		2020-06-15	Dar√≠o Garc√≠a de Viedma et al	Madrid
Spain/MD-IBV-99009630/2020	S	36	19B	Spain	Spain	Madrid	Madrid	EPI_ISL_654339	Human	Hospital General Universitario Gregorio Mara√±√≥n	A.5	One week ago	Europe	Male	SeqCOVID-SPAIN consortium/IBV(CSIC)		2020-08-08	Dar√≠o Garc√≠a de Viedma et al	Madrid
USA/IL-NM-0499/2020	S		19B	USA	USA	Illinois	Illinois	EPI_ISL_626434	Human	Northwestern Memorial Hospital	A.3	One month ago	North America		Ozer Lab		2020-04-24	Ramon Lorenzo-Redondo et al A	Chicago
Australia/QLD1175/2020	S		19B	Australia	Australia	Australia	Australia	EPI_ISL_639766	Human		A.1	One month ago	Oceania		Public Health Virology Laboratory, Forensic and Scientific Services (PHV-FSS)		2020-03-23	Son Nguyen et al. et al
EquatorialGuinea/253/2020			19B	Equatorial Guinea	Equatorial Guinea	Equatorial Guinea	Equatorial Guinea	EPI_ISL_648318	Human	Laboratorio de Investigaciones de Baney		One month ago	Africa		University Hospital Basel, Clinical Bacteriology		2020-03-24	Carlos Cortes et al
EquatorialGuinea/2500/2020		31	20A	Equatorial Guinea	Equatorial Guinea	Bioko Norte	Bioko Norte	EPI_ISL_648317	Human	Laboratorio de Investigaciones de Baney		One month ago	Africa	Female	University Hospital Basel, Clinical Bacteriology		2020-04-21	Carlos Cortes et al	Baney
EquatorialGuinea/5117/2020		28	20A	Equatorial Guinea	Equatorial Guinea	Bioko Norte	Bioko Norte	EPI_ISL_648341	Human	Laboratorio de Investigaciones de Baney		One month ago	Africa	Female	University Hospital Basel, Clinical Bacteriology		2020-04-30	Carlos Cortes et al	Malabo
EquatorialGuinea/8971/2020		48	20A	Equatorial Guinea	Equatorial Guinea	Bioko Norte	Bioko Norte	EPI_ISL_648351	Human	Laboratorio de Investigaciones de Baney		One month ago	Africa	Female	University Hospital Basel, Clinical Bacteriology		2020-05-18	Carlos Cortes et al	Malabo
EquatorialGuinea/12462/2020		48	20A	Equatorial Guinea	Equatorial Guinea	Bioko Norte	Bioko Norte	EPI_ISL_648311	Human	Laboratorio de Investigaciones de Baney		One month ago	Africa	Male	University Hospital Basel, Clinical Bacteriology		2020-05-29	Carlos Cortes et al	Baney
Ghana/UHAS-G541/2020		30	19B	Ghana	Ghana	Volta	Volta	EPI_ISL_648125	Human	UHAS COVID-19 Lab		One month ago	Africa	Male	UHAS COVID-19 Lab		2020-06-12	Kwabena O. Duedu et al
Ghana/UHAS-G441/2020		39	20B	Ghana	Ghana	Volta	Volta	EPI_ISL_648124	Human	UHAS COVID-19 Lab		One month ago	Africa	Male	UHAS COVID-19 Lab		2020-06-12	Kwabena O. Duedu et al
EquatorialGuinea/28098/2020		19	20A	Equatorial Guinea	Equatorial Guinea	Bioko Norte	Bioko Norte	EPI_ISL_648320	Human	Laboratorio de Investigaciones de Baney		One month ago	Africa	Female	University Hospital Basel, Clinical Bacteriology		2020-06-29	Carlos Cortes et al	Baney
EquatorialGuinea/32447/2020		48	20A	Equatorial Guinea	Equatorial Guinea	Litoral	Litoral	EPI_ISL_648324	Human	Laboratorio de Investigaciones de Baney		One month ago	Africa	Male	University Hospital Basel, Clinical Bacteriology		2020-07-07	Carlos Cortes et al	Mbini
EquatorialGuinea/38087/2020		67	20A	Equatorial Guinea	Equatorial Guinea	Bioko Norte	Bioko Norte	EPI_ISL_648330	Human	Laboratorio de Investigaciones de Baney		One month ago	Africa	Female	University Hospital Basel, Clinical Bacteriology		2020-07-16	Carlos Cortes et al	Malabo
EquatorialGuinea/46787/2020		34	20A	Equatorial Guinea	Equatorial Guinea	Litoral	Litoral	EPI_ISL_648337	Human	Laboratorio de Investigaciones de Baney		One month ago	Africa	Male	University Hospital Basel, Clinical Bacteriology		2020-08-02	Carlos Cortes et al	Bata
EquatorialGuinea/47665/2020		32	20A	Equatorial Guinea	Equatorial Guinea	Equatorial Guinea	Equatorial Guinea	EPI_ISL_648379	Human	Laboratorio de Investigaciones de Baney		One month ago	Africa	Male	University Hospital Basel, Clinical Bacteriology		2020-08-05	Carlos Cortes et al
EquatorialGuinea/49849/2020		45	20A	Equatorial Guinea	Equatorial Guinea	Bioko Norte	Bioko Norte	EPI_ISL_648338	Human	Laboratorio de Investigaciones de Baney		One month ago	Africa	Female	University Hospital Basel, Clinical Bacteriology		2020-08-12	Carlos Cortes et al	Malabo
EquatorialGuinea/50236/2020		30	20A	Equatorial Guinea	Equatorial Guinea	Bioko Norte	Bioko Norte	EPI_ISL_648339	Human	Laboratorio de Investigaciones de Baney		One month ago	Africa	Male	University Hospital Basel, Clinical Bacteriology		2020-08-14	Carlos Cortes et al	Malabo
Singapore/1251/2020		37	19A	Singapore	Singapore	Singapore	Singapore	EPI_ISL_648669	Human	Department of Laboratory Medicine, Tan Tock Seng Hospital		One month ago	Asia	Male	Department of Laboratory Medicine, Tan Tock Seng Hospital		2020-05-02	Chen YYC et al
Sweden/20-52820/2020		34	20A	Sweden	Sweden	Gavleborgs Lan	Gavleborgs Lan	EPI_ISL_648163	Human	Gavle klinisk mikrobiologi		One month ago	Europe	Female	The Public Health Agency of Sweden		2020-08-17	Anna-Malin Linde et al
Sweden/20-52711/2020		22	20B	Sweden	Sweden	Orebro	Orebro	EPI_ISL_648204	Human	Orebro klinisk mikrobiologi		One month ago	Europe	Female	The Public Health Agency of Sweden		2020-08-26	Anna-Malin Linde et al
Sweden/20-53128/2020		18	20B	Sweden	Sweden	Sweden	Sweden	EPI_ISL_648170	Human	The Public Health Agency of Sweden		One month ago	Europe	Female	The Public Health Agency of Sweden		2020-09-14	Anna-Malin Linde et al
Sweden/20-53009/2020		73	20B	Sweden	Sweden	Orebro	Orebro	EPI_ISL_648206	Human	Orebro klinisk mikrobiologi		One month ago	Europe	Male	The Public Health Agency of Sweden		2020-09-28	Anna-Malin Linde et al
Sweden/20-53105/2020		31	20B	Sweden	Sweden	Sweden	Sweden	EPI_ISL_648197	Human	The Public Health Agency of Sweden		One month ago	Europe	Female	The Public Health Agency of Sweden		2020-09-28	Anna-Malin Linde et al
Sweden/20-53078/2020		44	20B	Sweden	Sweden	Sweden	Sweden	EPI_ISL_648147	Human	The Public Health Agency of Sweden		One month ago	Europe	Female	The Public Health Agency of Sweden		2020-10-02	Anna-Malin Linde et al
Sweden/20-09857/2020		65	20A	Sweden	Sweden	Sweden	Sweden	EPI_ISL_648152	Human	Stockholm		One month ago	Europe	Female	The Public Health Agency of Sweden		2020-10-17	Anna-Malin Linde et al
Sweden/20-53238/2020		49	20A	Sweden	Sweden	Sweden	Sweden	EPI_ISL_648200	Human	Linkoping		One month ago	Europe	Male	The Public Health Agency of Sweden		2020-10-26	Anna-Malin Linde et al
Sweden/20-53269/2020		60	20A	Sweden	Sweden	Sweden	Sweden	EPI_ISL_648161	Human	Sundsvall		One month ago	Europe	Female	The Public Health Agency of Sweden		2020-10-26	Anna-Malin Linde et al
Mexico/NLE-UANL-126/2020		58	20A	Mexico	Mexico	Nuevo Leon	Nuevo Leon	EPI_ISL_648595	Human	Laboratorio de Infectolog√≠a Servicio de Infectolog√≠a Hospital Universitario Dr. Jos√© Eleuterio Gonz√°lez - Universidad Aut√≥noma de Nuevo Le√≥n		One month ago	North America	Female	Laboratorio de Infectolog√≠a Molecular Departamento de Bioqu√≠mica y Medicina Molecular Facultad de Medicina - Universidad Aut√≥noma de Nuevo Le√≥n		2020-03-16	Kame A. Gal√°n-Huerta et al
Mexico/NLE-UANL-1281/2020		51	20A	Mexico	Mexico	Nuevo Leon	Nuevo Leon	EPI_ISL_648600	Human	Laboratorio de Infectolog√≠a Servicio de Infectolog√≠a Hospital Universitario Dr. Jos√© Eleuterio Gonz√°lez - Universidad Aut√≥noma de Nuevo Le√≥n		One month ago	North America	Male	Laboratorio de Infectolog√≠a Molecular Departamento de Bioqu√≠mica y Medicina Molecular Facultad de Medicina - Universidad Aut√≥noma de Nuevo Le√≥n		2020-04-28	Kame A. Gal√°n-Huerta et al
USA/MA-JLL-383468S/2020		54	20C	USA	USA	Massachusetts	Massachusetts	EPI_ISL_648267	Human	Brigham and Women's Hospital		One month ago	North America	Male	Jonathan Li laboratory		2020-05-11	Jonathan Z. Li et al
Mexico/NLE-UANL-2098/2020		53	20B	Mexico	Mexico	Nuevo Leon	Nuevo Leon	EPI_ISL_648602	Human	Laboratorio de Infectolog√≠a Servicio de Infectolog√≠a Hospital Universitario Dr. Jos√© Eleuterio Gonz√°lez - Universidad Aut√≥noma de Nuevo Le√≥n		One month ago	North America	Male	Laboratorio de Infectolog√≠a Molecular Departamento de Bioqu√≠mica y Medicina Molecular Facultad de Medicina - Universidad Aut√≥noma de Nuevo Le√≥n		2020-05-23	Kame A. Gal√°n-Huerta et al
Mexico/NLE-UANL-4485/2020		33	20A	Mexico	Mexico	Nuevo Leon	Nuevo Leon	EPI_ISL_648608	Human	Laboratorio de Infectolog√≠a, Servicio de Infectolog√≠a, Hospital Universitario Dr. Jos√© Eleuterio Gonz√°lez - Universidad Aut√≥noma de Nuevo Le√≥n		One month ago	North America	Female	Laboratorio de Infectolog√≠a Molecular, Departamento de Bioqu√≠mica y Medicina Molecular,Facultad de Medicina - Universidad Aut√≥noma de Nuevo Le√≥n		2020-06-17	Kame A. Gal√°n-Huerta et al
Mexico/NLE-UANL-7088/2020		51	20A	Mexico	Mexico	Nuevo Leon	Nuevo Leon	EPI_ISL_648609	Human	Laboratorio de Infectolog√≠a, Servicio de Infectolog√≠a, Hospital Universitario Dr. Jos√© Eleuterio Gonz√°lez - Universidad Aut√≥noma de Nuevo Le√≥n		One month ago	North America	Female	Laboratorio de Infectolog√≠a Molecular, Departamento de Bioqu√≠mica y Medicina Molecular,Facultad de Medicina - Universidad Aut√≥noma de Nuevo Le√≥n		2020-07-05	Kame A. Gal√°n-Huerta et al
USA/CA-CZB-12812/2020			20B	USA	USA	California	California	EPI_ISL_648463	Human	Santa Clara County Public Health Laboratory		One month ago	North America		Chan-Zuckerberg Biohub		2020-09-10	CZB Cliahub Consortium et al B	Santa Clara County
USA/MD-MDH-0336/2020			20C	USA	USA	Maryland	Maryland	EPI_ISL_648280	Human	MD PHL		One month ago	North America		MD PHL		2020-10-14	Maryland Department of Health Laboratories Administration et al		MW280158.1
USA/CA-CZB-12869/2020			20B	USA	USA	California	California	EPI_ISL_648524	Human	Orange County Public Health Lab		One month ago	North America		Chan-Zuckerberg Biohub		2020-10-15	CZB Cliahub Consortium et al B	Orange County CA	MW306423.1
USA/MD-MDH-0348/2020			20A	USA	USA	Maryland	Maryland	EPI_ISL_648288	Human	MD PHL		One month ago	North America		MD PHL		2020-10-20	Maryland Department of Health Laboratories Administration et al		MW280166.1
USA/MD-MDH-0351/2020			20C	USA	USA	Maryland	Maryland	EPI_ISL_648290	Human	MD PHL		One month ago	North America		MD PHL		2020-10-20	Maryland Department of Health Laboratories Administration et al		MW280169.1
USA/MD-MDH-0360/2020			20C	USA	USA	Maryland	Maryland	EPI_ISL_648296	Human	MD PHL		One month ago	North America		MD PHL		2020-10-21	Maryland Department of Health Laboratories Administration et al		MW280178.1
Argentina/argenTAG-12926008/2020		49	20C	Argentina	Argentina	Buenos Aires	Buenos Aires	EPI_ISL_648216	Human	INBIRS-UBA		One month ago	South America	Male	Laboratorio Mixto de Biotecnolog√≠a Acu√°tica (LMBA)		2020-07-22	Joaqu√≠n Ezpeleta et al	La Matanza
Argentina/argenTAG-12CF5045/2020		56	20C	Argentina	Argentina	Buenos Aires	Buenos Aires	EPI_ISL_648212	Human	INBIRS-UBA		One month ago	South America	Female	Laboratorio Mixto de Biotecnolog√≠a Acu√°tica (LMBA)		2020-07-22	Joaqu√≠n Ezpeleta et al	La Matanza
Argentina/argenTAG-12CB103F/2020			20B	Argentina	Argentina	Buenos Aires	Buenos Aires	EPI_ISL_648218	Human	INBIRS-UBA		One month ago	South America		Laboratorio Mixto de Biotecnolog√≠a Acu√°tica (LMBA)		2020-07-22	Joaqu√≠n Ezpeleta et al	M√°ximo Paz
Argentina/argenTAG-12C0A026/2020		41	20B	Argentina	Argentina	Buenos Aires	Buenos Aires	EPI_ISL_648209	Human	INBIRS-UBA		One month ago	South America	Female	Laboratorio Mixto de Biotecnolog√≠a Acu√°tica (LMBA)		2020-07-22	Joaqu√≠n Ezpeleta et al	Ca√±uelas
Argentina/argenTAG-12BBC055/2020		49	20B	Argentina	Argentina	Buenos Aires	Buenos Aires	EPI_ISL_648210	Human	INBIRS-UBA		One month ago	South America	Female	Laboratorio Mixto de Biotecnolog√≠a Acu√°tica (LMBA)		2020-07-22	Joaqu√≠n Ezpeleta et al	Ca√±uelas

## Sheet: Region
Africa	264
Asia	155
Europe	345
North America	333
Oceania	90
South America	64

## Sheet: GISAID clade
G	235
GH	377
GR	441
GV	74
L	2
O	20
S	61
Unk.	41
